# Supplementary material for: A DNA Vaccine Inducing T Cell Responses Against CCHF: From in silico to in vivo
Source: Research Square preprint supplement (doi:10.21203/rs.3.rs-6238452/v1), 2025-05-22
Supplement: Supplementary file 1 [file f79efef9ceba42fb636990d2.docx]

**Supplementary Data**

**Supplementary Data S1**

**Sequence of Ank-2 strain**

**>CCHFV_Ank-2**

MENKIEVNNKDEMNRWFEEFKKGNGLMDTFTNSYSFCENVPNLDKFVFQMASATDDAQKDSIYASALVEATKFCAPIYECAWVSSTGIVKKGLEWFEKNSGTIKSWDENYAELKVDVPKIEQLANYQQAALKWRKDIGFRVNANTAALSNKVLAEYKVPGEIVMSVKEMLSDMIRRRNLILNRGGDENPRGPVSREHVEWCREFVKGKYIMAFNPPWGDINKSGRSGIALVATGLAKLAETEGKGVFDEAKKTVEALNGYLDKHRDEVDKASADSMITNLLKHIAKAQELYKNSSALRAQGAQIDTPFSSFYWLYKAGVTPETFPTISQFLFELGKQPRGTKKMKKALLSTPMKWGKKLYELFADDSFQQNRIYMHPAVLTAGRISEMGVCFGTIPVANPDDAAQGSGHTKSILNLRTSTETNNPCAKTIVKLFEIQKTGFNIQDMDIVASEHLLHQSLVGKQSPFQNAYNVKGNATSANII

**Supplementary Table 1.** Protein sequences from other Orthonairovirus haemorrhagiae strains.

| **No** | **Strain/Isolate** | **Organism** | **Accession number** |
| --- | --- | --- | --- |
| 1 | 10200 | *Orthonairovirus haemorrhagiae* | NP_950237.1 |
| 2 | isolate | *Orthonairovirus haemorrhagiae* | AHL45282.1 |
| 3 | HSADL/Gujrat/India/2011/292240 | *Orthonairovirus haemorrhagiae* | AFY97403.1 |
| 4 | Sudan AB1-2009 | *Orthonairovirus haemorrhagiae* | AEI70581.1 |
| 5 | Afg09-2990 | *Orthonairovirus haemorrhagiae* | ADQ57288.1 |
| 6 | Uganda 3010 | *Orthonairovirus haemorrhagiae* | AAB48507.1 |
| 7 | SPU415/85 | *Orthonairovirus haemorrhagiae* | AAB48506.1 |
| 8 | JD206 | *Orthonairovirus haemorrhagiae* | AAB48505.1 |
| 9 | HY-13 | *Orthonairovirus haemorrhagiae* | AAB48504.1 |
| 10 | Drosdov | *Orthonairovirus haemorrhagiae* | AAB48503.1 |
| 11 | DAK8194 | *Orthonairovirus haemorrhagiae* | AAB48502.1 |
| 12 | 10200 | *Orthonairovirus haemorrhagiae* | AAB48501.1 |
| 13 | isolate | *Orthonairovirus haemorrhagiae* | AAL28095.2 |
| 14 | SPU4/81 | *Orthonairovirus haemorrhagiae* | AAZ38665.1 |
| 15 | Semunya | *Orthonairovirus haemorrhagiae* | AAZ38662.1 |
| 16 | 7001 | *Orthonairovirus haemorrhagiae* | AAL08008.1 |
| 17 | isolate | *Orthonairovirus haemorrhagiae* | AAZ38664.1 |
| 18 | isolate | *Orthonairovirus haemorrhagiae* | ATG31910.1 |
| 19 | - | *Orthonairovirus haemorrhagiae* | AAA42888.1 |
| 20 | YL16070 | *Orthonairovirus haemorrhagiae* | APX34598.1 |
| 21 | SK2015/human | *Orthonairovirus haemorrhagiae* | ANN89748.1 |
| 22 | isolate | *Orthonairovirus haemorrhagiae* | AIE16147.1 |
| 23 | isolate | *Orthonairovirus haemorrhagiae* | AIE16146.1 |
| 24 | isolate | *Orthonairovirus haemorrhagiae* | AIE16145.1 |
| 25 | isolate | *Orthonairovirus haemorrhagiae* | AIE16144.1 |
| 26 | isolate | *Orthonairovirus haemorrhagiae* | AIE16143.1 |
| 27 | isolate | *Orthonairovirus haemorrhagiae* | AIE16142.1 |
| 28 | isolate | *Orthonairovirus haemorrhagiae* | AIE16141.1 |
| 29 | isolate | *Orthonairovirus haemorrhagiae* | AIE16140.1 |
| 30 | isolate | *Orthonairovirus haemorrhagiae* | AIE16139.1 |
| 31 | isolate | *Orthonairovirus haemorrhagiae* | AIE16138.1 |
| 32 | isolate | *Orthonairovirus haemorrhagiae* | AGR84316.1 |
| 33 | isolate | *Orthonairovirus haemorrhagiae* | ACF93431.2 |
| 34 | isolate | *Orthonairovirus haemorrhagiae* | AAA50177.1 |
| 35 | Sudan AL-Fulah 4-2008 | *Orthonairovirus haemorrhagiae* | ADE06073.1 |
| 36 | Sudan AL-Fulah 3-2008 | *Orthonairovirus haemorrhagiae* | ADE06072.1 |
| 37 | Kosava Hoti | *Orthonairovirus haemorrhagiae* | AAZ2529.1 |
| 38 | 8402 | *Orthonairovirus haemorrhagiae* | CAC11126.1 |
| 39 | 66019 | *Orthonairovirus haemorrhagiae* | CAC11125.1 |
| 40 | BA84027 | *Orthonairovirus haemorrhagiae* | XLQ26685.1 |
| 41 | BA84021 | *Orthonairovirus haemorrhagiae* | XLQ26684.1 |
| 42 | 84007 | *Orthonairovirus haemorrhagiae* | XLQ26683.1 |
| 43 | 7903 | *Orthonairovirus haemorrhagiae* | WLV27553.1 |
| 44 | 66019 | *Orthonairovirus haemorrhagiae* | WLV27552.1 |
| 45 | 75024 | *Orthonairovirus haemorrhagiae* | WLV27551.1 |
| 46 | 88017 | *Orthonairovirus haemorrhagiae* | WLV27550.1 |
| 47 | 88168 | *Orthonairovirus haemorrhagiae* | WLV27549.1 |
| 48 | A7001 | *Orthonairovirus haemorrhagiae* | WLV27548.1 |
| 49 | A73017 | *Orthonairovirus haemorrhagiae* | WLV27547.1 |
| 50 | A76048 | *Orthonairovirus haemorrhagiae* | WLV27546.1 |
| 51 | BA04032 | *Orthonairovirus haemorrhagiae* | WLV27545.1 |
| 52 | BA7708 | *Orthonairovirus haemorrhagiae* | WLV27544.1 |
| 53 | BA7902 | *Orthonairovirus haemorrhagiae* | WLV27543.1 |
| 54 | BA8004 | *Orthonairovirus haemorrhagiae* | WLV27542.1 |
| 55 | BA68038 | *Orthonairovirus haemorrhagiae* | WLV27541.1 |
| 56 | BA68045 | *Orthonairovirus haemorrhagiae* | WLV27540.1 |
| 57 | BA69034 | *Orthonairovirus haemorrhagiae* | WLV27539.1 |
| 58 | BA84002 | *Orthonairovirus haemorrhagiae* | WLV27538.1 |
| 59 | BA84051 | *Orthonairovirus haemorrhagiae* | WLV27537.1 |
| 60 | Ha75001 | *Orthonairovirus haemorrhagiae* | WLV27536.1 |
| 61 | HF7802 | *Orthonairovirus haemorrhagiae* | WLV27535.1 |
| 62 | YL04041 | *Orthonairovirus haemorrhagiae* | WLV275354.1 |
| 63 | isolate | *Orthonairovirus haemorrhagiae* | ULE37761.1 |
| 64 | isolate | *Orthonairovirus haemorrhagiae* | ULE37760.1 |
| 65 | isolate | *Orthonairovirus haemorrhagiae* | ULE37759.1 |
| 66 | isolate | *Orthonairovirus haemorrhagiae* | ULE37758.1 |
| 67 | MA/CCHFV | *Orthonairovirus haemorrhagiae* | ULE37757.1 |
| 68 | isolate | *Orthonairovirus haemorrhagiae* | QQK53154.1 |
| 69 | isolate | *Orthonairovirus haemorrhagiae* | QRG45926.1 |
| 70 | isolate | *Orthonairovirus haemorrhagiae* | QEQ12757.1 |
| 71 | isolate | *Orthonairovirus haemorrhagiae* | QEQ12754.1 |
| 72 | 10200 | *Orthonairovirus haemorrhagiae* | AUX63619.1 |
| 73 | Hoti | *Orthonairovirus haemorrhagiae* | AUX63616.1 |
| 74 | isolate | *Orthonairovirus haemorrhagiae* | AVO00705.1 |
| 75 | 75024 | CCHFV strain China | AAK52505.1 |
| 76 | 79121 | CCHFV strain China | AAK43619.1 |
| 77 | 88166 | CCHFV strain China | AAK32973.1 |
| 78 | 7803 | CCHFV strain China | AAK40124.1 |
| 79 | IbAr10200 | *Orthonairovirus haemorrhagiae* | XJU66845.1 |
| 80 | isolate | *Orthonairovirus haemorrhagiae* | XCY99300.1 |
| 81 | 2795 | *Orthonairovirus haemorrhagiae* | XCG44748.1 |
| 82 | 2713 | *Orthonairovirus haemorrhagiae* | XCG44745.1 |
| 83 | isolate | *Orthonairovirus haemorrhagiae* | XAF84303.1 |
| 84 | isolate | *Orthonairovirus haemorrhagiae* | WRV02128.1 |
| 85 | isolate | *Orthonairovirus haemorrhagiae* | WRV02127.1 |
| 86 | isolate | *Orthonairovirus haemorrhagiae* | WRV02126.1 |
| 87 | isolate | *Orthonairovirus haemorrhagiae* | WRV02125.1 |
| 88 | isolate | *Orthonairovirus haemorrhagiae* | WRV02124.1 |
| 89 | isolate | *Orthonairovirus haemorrhagiae* | WRV02123.1 |
| 90 | isolate | *Orthonairovirus haemorrhagiae* | WRV02122.1 |
| 91 | isolate | *Orthonairovirus haemorrhagiae* | WRV02121.1 |
| 92 | isolate | *Orthonairovirus haemorrhagiae* | WRV02120.1 |
| 93 | isolate | *Orthonairovirus haemorrhagiae* | WRV02119.1 |
| 94 | isolate | *Orthonairovirus haemorrhagiae* | WRV02118.1 |
| 95 | isolate | *Orthonairovirus haemorrhagiae* | WRV02117.1 |
| 96 | isolate | *Orthonairovirus haemorrhagiae* | WRV02116.1 |
| 97 | isolate | *Orthonairovirus haemorrhagiae* | WRV02115.1 |
| 98 | isolate | *Orthonairovirus haemorrhagiae* | WHU52062.1 |
| 99 | isolate | *Orthonairovirus haemorrhagiae* | WCP86762.1 |
| 100 | isolate | *Orthonairovirus haemorrhagiae* | WCP86761.1 |
| 101 | isolate | *Orthonairovirus haemorrhagiae* | WCP86760.1 |
| 102 | isolate | *Orthonairovirus haemorrhagiae* | WCD68695.1 |
| 103 | isolate | *Orthonairovirus haemorrhagiae* | WCD68694.1 |
| 104 | isolate | *Orthonairovirus haemorrhagiae* | WCD68693.1 |
| 105 | isolate | *Orthonairovirus haemorrhagiae* | WCD68692.1 |
| 106 | isolate | *Orthonairovirus haemorrhagiae* | WCD68691.1 |
| 107 | isolate | *Orthonairovirus haemorrhagiae* | WCD68690.1 |
| 108 | isolate | *Orthonairovirus haemorrhagiae* | WCC90989.1 |
| 109 | isolate | *Orthonairovirus haemorrhagiae* | WCC90988.1 |
| 110 | isolate | *Orthonairovirus haemorrhagiae* | UXM19304.1 |
| 111 | isolate | *Orthonairovirus haemorrhagiae* | UXM19303.1 |
| 112 | isolate | *Orthonairovirus haemorrhagiae* | UXM19302.1 |
| 113 | isolate | *Orthonairovirus haemorrhagiae* | QYF06548.1 |
| 114 | isolate | *Orthonairovirus haemorrhagiae* | QYF06547.1 |
| 115 | isolate | *Orthonairovirus haemorrhagiae* | QYF06546.1 |
| 116 | isolate | *Orthonairovirus haemorrhagiae* | QYF06545.1 |
| 117 | isolate | *Orthonairovirus haemorrhagiae* | QYF06544.1 |
| 118 | isolate | *Orthonairovirus haemorrhagiae* | QYF06543.1 |
| 119 | isolate | *Orthonairovirus haemorrhagiae* | QYF06542.1 |
| 120 | Badajoz 2018 | *Orthonairovirus haemorrhagiae* | QQL93571.1 |
| 121 | isolate | *Orthonairovirus haemorrhagiae* | QKW94277.1 |
| 122 | isolate | *Orthonairovirus haemorrhagiae* | QKW94276.1 |
| 123 | isolate | *Orthonairovirus haemorrhagiae* | QKW94273.1 |
| 124 | isolate | *Orthonairovirus haemorrhagiae* | QKW94270.1 |
| 125 | isolate | *Orthonairovirus haemorrhagiae* | QKW94267.1 |
| 126 | isolate | *Orthonairovirus haemorrhagiae* | QKW94263.1 |
| 127 | isolate | *Orthonairovirus haemorrhagiae* | QKW94261.1 |
| 128 | isolate | *Orthonairovirus haemorrhagiae* | QKW94258.1 |
| 129 | isolate | *Orthonairovirus haemorrhagiae* | QKW94255.1 |
| 130 | isolate | *Orthonairovirus haemorrhagiae* | QKW94251.1 |
| 131 | isolate | *Orthonairovirus haemorrhagiae* | QKW94249.1 |
| 132 | isolate | *Orthonairovirus haemorrhagiae* | QKW94246.1 |
| 133 | isolate | *Orthonairovirus haemorrhagiae* | QKW94243.1 |
| 134 | isolate | *Orthonairovirus haemorrhagiae* | QKW94240.1 |
| 135 | isolate | *Orthonairovirus haemorrhagiae* | QKW94237.1 |
| 136 | isolate | *Orthonairovirus haemorrhagiae* | QKW94234.1 |
| 137 | isolate | *Orthonairovirus haemorrhagiae* | QKW94231.1 |
| 138 | isolate | *Orthonairovirus haemorrhagiae* | QKW94228.1 |
| 139 | isolate | *Orthonairovirus haemorrhagiae* | QKW94225.1 |
| 140 | isolate | *Orthonairovirus haemorrhagiae* | QKW93989.1 |
| 141 | isolate | *Orthonairovirus haemorrhagiae* | QKW93986.1 |
| 142 | isolate | *Orthonairovirus haemorrhagiae* | QKW93983.1 |
| 143 | isolate | *Orthonairovirus haemorrhagiae* | QKW93981.1 |
| 144 | isolate | *Orthonairovirus haemorrhagiae* | QKW93977.1 |
| 145 | isolate | *Orthonairovirus haemorrhagiae* | QKW93975.1 |
| 146 | isolate | *Orthonairovirus haemorrhagiae* | QKW93972.1 |
| 147 | isolate | *Orthonairovirus haemorrhagiae* | QKW93969.1 |
| 148 | isolate | *Orthonairovirus haemorrhagiae* | QKW93964.1 |
| 149 | isolate | *Orthonairovirus haemorrhagiae* | QKW93963.1 |
| 150 | isolate | *Orthonairovirus haemorrhagiae* | QKW93960.1 |
| 151 | isolate | *Orthonairovirus haemorrhagiae* | QKW93957.1 |
| 152 | isolate | *Orthonairovirus haemorrhagiae* | QKV43188.1 |
| 153 | isolate | *Orthonairovirus haemorrhagiae* | QKV43187.1 |
| 154 | isolate | *Orthonairovirus haemorrhagiae* | QKV43186.1 |
| 155 | isolate | *Orthonairovirus haemorrhagiae* | QKV43185.1 |
| 156 | isolate | *Orthonairovirus haemorrhagiae* | QKV43184.1 |
| 157 | isolate | *Orthonairovirus haemorrhagiae* | QKV43183.1 |
| 158 | isolate | *Orthonairovirus haemorrhagiae* | QKV43182.1 |
| 159 | isolate | *Orthonairovirus haemorrhagiae* | QKV43181.1 |
| 160 | isolate | *Orthonairovirus haemorrhagiae* | QKV43180.1 |
| 161 | YL16204 | *Orthonairovirus haemorrhagiae* | QBQ64916.1 |
| 162 | isolate | *Orthonairovirus haemorrhagiae* | AXH37994.1 |
| 163 | isolate | *Orthonairovirus haemorrhagiae* | AXH37993.1 |
| 164 | isolate | *Orthonairovirus haemorrhagiae* | AXH37992.1 |
| 165 | isolate | *Orthonairovirus haemorrhagiae* | AXH37991.1 |
| 166 | isolate | *Orthonairovirus haemorrhagiae* | AXH37990.1 |
| 167 | isolate | *Orthonairovirus haemorrhagiae* | AXH37989.1 |
| 168 | isolate | *Orthonairovirus haemorrhagiae* | AXH37988.1 |
| 169 | isolate | *Orthonairovirus haemorrhagiae* | AXH37987.1 |
| 170 | isolate | *Orthonairovirus haemorrhagiae* | AXH37986.1 |
| 171 | isolate | *Orthonairovirus haemorrhagiae* | AXH37985.1 |
| 172 | isolate | *Orthonairovirus haemorrhagiae* | AXH37984.1 |
| 173 | isolate | *Orthonairovirus haemorrhagiae* | AXH37983.1 |
| 174 | isolate | *Orthonairovirus haemorrhagiae* | AWD73836.1 |
| 175 | isolate | *Orthonairovirus haemorrhagiae* | AWD73835.1 |
| 176 | isolate | *Orthonairovirus haemorrhagiae* | AWD73834.1 |
| 177 | isolate | *Orthonairovirus haemorrhagiae* | AWD73833.1 |
| 178 | isolate | *Orthonairovirus haemorrhagiae* | AWD73832.1 |
| 179 | isolate | *Orthonairovirus haemorrhagiae* | AWD73831.1 |
| 180 | isolate | *Orthonairovirus haemorrhagiae* | AWD73830.1 |
| 181 | isolate | *Orthonairovirus haemorrhagiae* | AWD73829.1 |
| 182 | isolate | *Orthonairovirus haemorrhagiae* | AWD73828.1 |
| 183 | isolate | *Orthonairovirus haemorrhagiae* | AWD73827.1 |
| 184 | isolate | *Orthonairovirus haemorrhagiae* | AWD73826.1 |
| 185 | isolate | *Orthonairovirus haemorrhagiae* | AWD73825.1 |
| 186 | isolate | *Orthonairovirus haemorrhagiae* | AVY03783.1 |
| 187 | AP92 | *Orthonairovirus haemorrhagiae* | SIP56223.1 |
| 188 | isolate | *Orthonairovirus haemorrhagiae* | ASW22381.1 |
| 189 | isolate | *Orthonairovirus haemorrhagiae* | ASW22380.1 |
| 190 | isolate | *Orthonairovirus haemorrhagiae* | ASW22379.1 |
| 191 | isolate | *Orthonairovirus haemorrhagiae* | ASW22377.1 |
| 192 | isolate | *Orthonairovirus haemorrhagiae* | ASW22376.1 |
| 193 | isolate | *Orthonairovirus haemorrhagiae* | ASW22358.1 |
| 194 | isolate | *Orthonairovirus haemorrhagiae* | ASW22357.1 |
| 195 | isolate | *Orthonairovirus haemorrhagiae* | ASW22356.1 |
| 196 | isolate | *Orthonairovirus haemorrhagiae* | ASW22355.1 |
| 197 | isolate | *Orthonairovirus haemorrhagiae* | ASW22353.1 |
| 198 | isolate | *Orthonairovirus haemorrhagiae* | ASW22352.1 |
| 199 | isolate | *Orthonairovirus haemorrhagiae* | ASW22351.1 |
| 200 | isolate | *Orthonairovirus haemorrhagiae* | ASW22350.1 |
| 201 | isolate | *Orthonairovirus haemorrhagiae* | ASW22349.1 |
| 202 | isolate | *Orthonairovirus haemorrhagiae* | ASW22348.1 |
| 203 | isolate | *Orthonairovirus haemorrhagiae* | APZ76785.1 |
| 204 | NIV161064 | *Orthonairovirus haemorrhagiae* | ABA18804 |
| 205 | Congo 3010 | CCHFV | P89522.1 |
| 206 | IbAr10200 | CCHFV | P27317.1 |
| 207 | isolate | *Orthonairovirus haemorrhagiae* | QBP34449.1 |
| 208 | NIV1733666 | *Orthonairovirus haemorrhagiae* | QBP34446.1 |
| 209 | NIV1727150 | *Orthonairovirus haemorrhagiae* | QBP34443.1 |
| 210 | NIV1616734 | *Orthonairovirus haemorrhagiae* | QBP34440.1 |
| 211 | NIV1614467 | *Orthonairovirus haemorrhagiae* | QBP34437.1 |
| 212 | NIV164392 | *Orthonairovirus haemorrhagiae* | QBP34434.1 |
| 213 | NIV1513322 | *Orthonairovirus haemorrhagiae* | QBP34431.1 |
| 214 | NIV1511559 | *Orthonairovirus haemorrhagiae* | QBP34428.1 |
| 215 | NIV151175 | *Orthonairovirus haemorrhagiae* | QBP34425.1 |
| 216 | NIV149247 | *Orthonairovirus haemorrhagiae* | QBP34422.1 |
| 217 | NIV1721741 | *Orthonairovirus haemorrhagiae* | QBP34419.1 |
| 218 | NIV1311122 | *Orthonairovirus haemorrhagiae* | QBP34416.1 |
| 219 | NIV1040505 | *Orthonairovirus haemorrhagiae* | 3U3I_A |
| 220 | - | *Orthonairovirus haemorrhagiae* |  |
| 221 | - | *Orthonairovirus haemorrhagiae* | 6Z0O_B |
| 222 | - | *Orthonairovirus haemorrhagiae* | 6Z0O_A |
| 223 | isolate | *Orthonairovirus haemorrhagiae* | XKB88838.1 |
| 224 | isolate | *Orthonairovirus haemorrhagiae* | XKB88837.1 |
| 225 | isolate | *Orthonairovirus haemorrhagiae* | XKB88836.1 |
| 226 | isolate | *Orthonairovirus haemorrhagiae* | XKB88835.1 |

**Supplementary Table 2** Prediction of MHC-I epitopes with binding affinity to CCHFV-NP using the IEDB database (August 2020 data)

| **Allele** | **Peptide** | **Score** | **Percentile Rank** |
| --- | --- | --- | --- |
| HLA-A*01:01 | LVDTFTNSY | 0.993204 | 0.01 |
| HLA-A*01:01 | IDTAFSSYY | 0.493413 | 0.39 |
| HLA-A*01:01 | QIDTAFSSY | 0.970015 | 0.02 |
| HLA-A*01:01 | LSNKVLAEY | 0.896224 | 0.08 |
| HLA-A*01:01 | KTVEALNGY | 0.607245 | 0.28 |
| HLA-A*01:01 | HIAKAQELY | 0.702644 | 0.2 |
| HLA-A*01:01 | GLVDTFTNSY | 0.905531 | 0.07 |
| HLA-A*01:01 | QIDTAFSSYY | 0.959414 | 0.04 |
| HLA-A*01:01 | LVDTFTNSYS | 0.586191 | 0.3 |
| HLA-A*01:01 | AQIDTAFSSY | 0.850279 | 0.11 |
| HLA-A*01:01 | ALSNKVLAEY | 0.549241 | 0.33 |
| HLA-A*01:01 | GTIKSWDESY | 0.440396 | 0.47 |
| HLA-A*01:01 | DTAFSSYYWLY | 0.509498 | 0.37 |
| HLA-A*01:01 | ATDDAQKDSIY | 0.987467 | 0.01 |
| HLA-A*01:01 | NGLVDTFTNSY | 0.830019 | 0.12 |
| HLA-A*01:01 | SAQIDTAFSSY | 0.796317 | 0.14 |
|  |  |  |  |
| HLA-A*02:01 | YLDKHKDEV | 0.899315 | 0.04 |
| HLA-A*02:01 | YMHPAVLTA | 0.881028 | 0.06 |
| HLA-A*02:01 | NLDRFVFQM | 0.587772 | 0.28 |
| HLA-A*02:01 | NLLKHIAKA | 0.538669 | 0.33 |
| HLA-A*02:01 | KTIVKLFEV | 0.494662 | 0.38 |
| HLA-A*02:01 | VTPETFPTV | 0.488594 | 0.38 |
|  |  |  |  |
| HLA-A*02:06 | YMHPAVLTA | 0.820639 | 0.08 |
| HLA-A*02:06 | VTPETFPTV | 0.787122 | 0.09 |
| HLA-A*02:06 | YLDKHKDEV | 0.742005 | 0.11 |
| HLA-A*02:06 | KTIVKLFEV | 0.72414 | 0.12 |
| HLA-A*02:06 | TVSQFLFEL | 0.486154 | 0.32 |
| HLA-A*02:06 | LVATGLAKL | 0.429845 | 0.41 |
| HLA-A*02:06 | KVPGEIVMSV | 0.578689 | 0.23 |
| HLA-A*02:06 | GVTPETFPTV | 0.501617 | 0.31 |
|  |  |  |  |
| HLA-A*03:01 | ALVATGLAK | 0.852154 | 0.04 |
| HLA-A*03:01 | LLHQSLVGK | 0.786364 | 0.08 |
| HLA-A*03:01 | VSSTGIVKK | 0.699535 | 0.14 |
| HLA-A*03:01 | SQFLFELGK | 0.45137 | 0.39 |
| HLA-A*03:01 | KALLSTPMK | 0.571541 | 0.25 |
| HLA-A*03:01 | ASALVEATK | 0.536735 | 0.29 |
| HLA-A*03:01 | IVKLFEVQK | 0.529966 | 0.3 |
| HLA-A*03:01 | ALNGYLDKHK | 0.50004 | 0.33 |
| HLA-A*03:01 | HLLHQSLVGK | 0.483692 | 0.34 |
| HLA-A*03:01 | HIAKAQELYK | 0.644565 | 0.18 |
| HLA-A*03:01 | AWVSSTGIVK | 0.586723 | 0.23 |
| HLA-A*03:01 | IALVATGLAK | 0.416852 | 0.43 |
| HLA-A*03:01 | ALSNKVLAEY | 0.39939 | 0.48 |
| HLA-A*03:01 | ALSNKVLAEYK | 0.386307 | 0.49 |
| HLA-A*03:01 | ALLSTPMKWGK | 0.541885 | 0.28 |
|  |  |  |  |
| HLA-A*11:01 | VSSTGIVKK | 0.860106 | 0.04 |
| HLA-A*11:01 | ASALVEATK | 0.785538 | 0.08 |
| HLA-A*11:01 | ALVATGLAK | 0.716099 | 0.13 |
| HLA-A*11:01 | KALLSTPMK | 0.667678 | 0.17 |
| HLA-A*11:01 | IAKAQELYK | 0.424309 | 0.45 |
| HLA-A*11:01 | SQFLFELGK | 0.655228 | 0.18 |
| HLA-A*11:01 | KTVEALNGY | 0.616912 | 0.22 |
| HLA-A*11:01 | AAQGSGHTK | 0.605948 | 0.23 |
| HLA-A*11:01 | IVKLFEVQK | 0.599784 | 0.23 |
| HLA-A*11:01 | WVSSTGIVK | 0.500201 | 0.33 |
| HLA-A*11:01 | FSSYYWLYK | 0.498112 | 0.34 |
| HLA-A*11:01 | LLHQSLVGK | 0.453419 | 0.39 |
| HLA-A*11:01 | WVSSTGIVKK | 0.430911 | 0.45 |
| HLA-A*11:01 | HIAKAQELYK | 0.591108 | 0.24 |
| HLA-A*11:01 | AWVSSTGIVK | 0.659144 | 0.18 |
| HLA-A*11:01 | AWVSSTGIVKK | 0.408575 | 0.48 |
|  |  |  |  |
| HLA-A*23:01 | GYQQAALKW | 0.826919 | 0.09 |
| HLA-A*23:01 | ALLSTPMKW | 0.416076 | 0.47 |
| HLA-A*23:01 | TFPTVSQFL | 0.68308 | 0.17 |
| HLA-A*23:01 | KWGKKLYEL | 0.550427 | 0.29 |
| HLA-A*23:01 | SWDESYTEL | 0.496271 | 0.37 |
| HLA-A*23:01 | TFPTVSQFLF | 0.87924 | 0.07 |
| HLA-A*23:01 | KWGKKLYELF | 0.550539 | 0.29 |
| HLA-A*23:01 | TGYQQAALKW | 0.490539 | 0.38 |
| HLA-A*23:01 | LYELFADDSF | 0.485294 | 0.38 |
| HLA-A*23:01 | KYIMAFNPPW | 0.422782 | 0.45 |
| HLA-A*23:01 | LYKAGVTPETF | 0.649055 | 0.19 |
|  |  |  |  |
| HLA-A*24:02 | GYQQAALKW | 0.833483 | 0.09 |
| HLA-A*24:02 | KWGKKLYEL | 0.669753 | 0.21 |
| HLA-A*24:02 | TFPTVSQFL | 0.768682 | 0.13 |
| HLA-A*24:02 | SWDESYTEL | 0.589548 | 0.29 |
| HLA-A*24:02 | KWGKKLYELF | 0.666664 | 0.21 |
| HLA-A*24:02 | KYIMAFNPPW | 0.453057 | 0.45 |
| HLA-A*24:02 | TGYQQAALKW | 0.565447 | 0.31 |
| HLA-A*24:02 | LYELFADDSF | 0.505421 | 0.39 |
| HLA-A*24:02 | TFPTVSQFLF | 0.928261 | 0.04 |
| HLA-A*24:02 | LYKAGVTPETF | 0.749375 | 0.15 |
|  |  |  |  |
| HLA-A*25:01 | ETFPTVSQF | 0.925043 | 0.01 |
| HLA-A*25:01 | DTFTNSYSF | 0.686178 | 0.01 |
| HLA-A*25:01 | KTVEALNGY | 0.420014 | 0.05 |
| HLA-A*25:01 | DTAFSSYYW | 0.386981 | 0.06 |
| HLA-A*25:01 | ESVPNLDRF | 0.342815 | 0.09 |
| HLA-A*25:01 | EIVMSVKEM | 0.304987 | 0.1 |
| HLA-A*25:01 | DSFQQNRIY | 0.284774 | 0.12 |
| HLA-A*25:01 | HIAKAQELY | 0.283293 | 0.12 |
| HLA-A*25:01 | LTAGRISEM | 0.278739 | 0.12 |
| HLA-A*25:01 | TIKSWDESY | 0.204059 | 0.19 |
| HLA-A*25:01 | ELYKNSSAL | 0.152088 | 0.27 |
| HLA-A*25:01 | QIDTAFSSY | 0.144207 | 0.28 |
| HLA-A*25:01 | LVDTFTNSY | 0.143071 | 0.28 |
| HLA-A*25:01 | QSAQIDTAF | 0.180153 | 0.22 |
| HLA-A*25:01 | EAKKTVEAL | 0.136675 | 0.29 |
| HLA-A*25:01 | LSNKVLAEY | 0.125323 | 0.33 |
| HLA-A*25:01 | YIMAFNPPW | 0.120317 | 0.34 |
| HLA-A*25:01 | DSIYASALV | 0.097201 | 0.44 |
| HLA-A*25:01 | DIVASEHLL | 0.094896 | 0.46 |
| HLA-A*25:01 | ETFPTVSQFL | 0.169234 | 0.24 |
| HLA-A*25:01 | PETFPTVSQF | 0.155208 | 0.26 |
| HLA-A*25:01 | FVKGKYIMAF | 0.142267 | 0.28 |
| HLA-A*25:01 | AQIDTAFSSY | 0.09107 | 0.48 |
| HLA-A*25:01 | DVPKIEQLTGY | 0.247579 | 0.14 |
| HLA-A*25:01 | ETFPTVSQFLF | 0.182726 | 0.22 |
|  |  |  |  |
| HLA-A*26:01 | ETFPTVSQF | 0.966343 | 0.01 |
| HLA-A*26:01 | DTFTNSYSF | 0.8193 | 0.03 |
| HLA-A*26:01 | KTVEALNGY | 0.714531 | 0.05 |
| HLA-A*26:01 | EIVMSVKEM | 0.637006 | 0.08 |
| HLA-A*26:01 | HIAKAQELY | 0.624127 | 0.08 |
| HLA-A*26:01 | LTAGRISEM | 0.623531 | 0.08 |
| HLA-A*26:01 | DTAFSSYYW | 0.310478 | 0.26 |
| HLA-A*26:01 | ESVPNLDRF | 0.494652 | 0.13 |
| HLA-A*26:01 | DSFQQNRIY | 0.451591 | 0.16 |
| HLA-A*26:01 | TIKSWDESY | 0.419654 | 0.17 |
| HLA-A*26:01 | ELYKNSSAL | 0.186386 | 0.47 |
| HLA-A*26:01 | QIDTAFSSY | 0.365394 | 0.21 |
| HLA-A*26:01 | QSAQIDTAF | 0.254385 | 0.35 |
| HLA-A*26:01 | LVDTFTNSY | 0.341931 | 0.22 |
| HLA-A*26:01 | LSNKVLAEY | 0.297681 | 0.27 |
| HLA-A*26:01 | SVKEMLSDM | 0.242781 | 0.37 |
| HLA-A*26:01 | FVKGKYIMAF | 0.293824 | 0.28 |
| HLA-A*26:01 | KKTVEALNGY | 0.273882 | 0.31 |
| HLA-A*26:01 | GLVDTFTNSY | 0.259804 | 0.34 |
| HLA-A*26:01 | ETFPTVSQFL | 0.297154 | 0.27 |
| HLA-A*26:01 | AQIDTAFSSY | 0.202594 | 0.43 |
| HLA-A*26:01 | PETFPTVSQF | 0.351657 | 0.22 |
| HLA-A*26:01 | DVPKIEQLTGY | 0.810356 | 0.03 |
| HLA-A*26:01 | ETFPTVSQFLF | 0.40578 | 0.18 |
| HLA-A*26:01 | AKKTVEALNGY | 0.239018 | 0.37 |
|  |  |  |  |
| HLA-A*29:02 | AFSSYYWLY | 0.92803 | 0.02 |
| HLA-A*29:02 | HIAKAQELY | 0.880607 | 0.04 |
| HLA-A*29:02 | LVDTFTNSY | 0.783188 | 0.09 |
| HLA-A*29:02 | KTVEALNGY | 0.755513 | 0.11 |
| HLA-A*29:02 | QIDTAFSSY | 0.671297 | 0.15 |
| HLA-A*29:02 | LSNKVLAEY | 0.650917 | 0.16 |
| HLA-A*29:02 | KQSPFQNAY | 0.613644 | 0.17 |
| HLA-A*29:02 | TIKSWDESY | 0.4615 | 0.26 |
| HLA-A*29:02 | IDTAFSSYY | 0.303281 | 0.43 |
| HLA-A*29:02 | IVASEHLLH | 0.286904 | 0.46 |
| HLA-A*29:02 | ALSNKVLAEY | 0.351189 | 0.36 |
| HLA-A*29:02 | QIDTAFSSYY | 0.280555 | 0.47 |
| HLA-A*29:02 | AQIDTAFSSY | 0.596303 | 0.17 |
| HLA-A*29:02 | GLVDTFTNSY | 0.522089 | 0.22 |
| HLA-A*29:02 | TAFSSYYWLY | 0.468821 | 0.25 |
| HLA-A*29:02 | AQIDTAFSSYY | 0.451504 | 0.26 |
|  |  |  |  |
| HLA-A*30:01 | KALLSTPMK | 0.56122 | 0.05 |
| HLA-A*30:01 | AAQGSGHTK | 0.528262 | 0.07 |
| HLA-A*30:01 | RVNANTAAL | 0.487045 | 0.1 |
| HLA-A*30:01 | IAKAQELYK | 0.466083 | 0.1 |
| HLA-A*30:01 | IVKLFEVQK | 0.395324 | 0.16 |
| HLA-A*30:01 | RIYMHPAVL | 0.380876 | 0.18 |
| HLA-A*30:01 | VSSTGIVKK | 0.364222 | 0.21 |
| HLA-A*30:01 | KMKKALLST | 0.349765 | 0.24 |
| HLA-A*30:01 | ASALVEATK | 0.339134 | 0.27 |
| HLA-A*30:01 | LGKQPRGTK | 0.329555 | 0.28 |
| HLA-A*30:01 | SGRSGIALV | 0.324287 | 0.29 |
| HLA-A*30:01 | ALVATGLAK | 0.263382 | 0.47 |
| HLA-A*30:01 | MIRRRNLIL | 0.261043 | 0.48 |
| HLA-A*30:01 | KTIVKLFEV | 0.260166 | 0.48 |
| HLA-A*30:01 | ALRAQSAQI | 0.257547 | 0.5 |
| HLA-A*30:01 | KSGRSGIALV | 0.354021 | 0.23 |
|  |  |  |  |
| HLA-A*30:02 | KQSPFQNAY | 0.888079 | 0.01 |
| HLA-A*30:02 | KTVEALNGY | 0.881236 | 0.01 |
| HLA-A*30:02 | LSNKVLAEY | 0.784321 | 0.03 |
| HLA-A*30:02 | HIAKAQELY | 0.75729 | 0.04 |
| HLA-A*30:02 | IDTAFSSYY | 0.313314 | 0.47 |
| HLA-A*30:02 | LVDTFTNSY | 0.663553 | 0.09 |
| HLA-A*30:02 | QIDTAFSSY | 0.656045 | 0.09 |
| HLA-A*30:02 | ATKFCAPIY | 0.532165 | 0.18 |
| HLA-A*30:02 | AFSSYYWLY | 0.524186 | 0.18 |
| HLA-A*30:02 | TIKSWDESY | 0.507009 | 0.19 |
| HLA-A*30:02 | GKQSPFQNAY | 0.505504 | 0.19 |
| HLA-A*30:02 | GLVDTFTNSY | 0.494166 | 0.21 |
| HLA-A*30:02 | KHIAKAQELY | 0.486286 | 0.22 |
| HLA-A*30:02 | GTIKSWDESY | 0.421056 | 0.29 |
| HLA-A*30:02 | QIDTAFSSYY | 0.353227 | 0.39 |
| HLA-A*30:02 | AQIDTAFSSY | 0.716541 | 0.06 |
| HLA-A*30:02 | ALSNKVLAEY | 0.576576 | 0.13 |
| HLA-A*30:02 | KKTVEALNGY | 0.568572 | 0.14 |
| HLA-A*30:02 | AQIDTAFSSYY | 0.489847 | 0.21 |
|  |  |  |  |
| HLA-A*31:01 | HTKSILNLR | 0.903229 | 0.01 |
| HLA-A*31:01 | MLSDMIRRR | 0.577589 | 0.17 |
| HLA-A*31:01 | KWRKDIGFR | 0.554062 | 0.19 |
| HLA-A*31:01 | LYKNSSALR | 0.550176 | 0.19 |
| HLA-A*31:01 | IVKLFEVQK | 0.373139 | 0.43 |
| HLA-A*31:01 | GHTKSILNLR | 0.556538 | 0.19 |
|  |  |  |  |
| HLA-A*32:01 | RIYMHPAVL | 0.786003 | 0.02 |
| HLA-A*32:01 | ALLSTPMKW | 0.779898 | 0.03 |
| HLA-A*32:01 | RVNANTAAL | 0.630148 | 0.07 |
| HLA-A*32:01 | KTVEALNGY | 0.617783 | 0.08 |
| HLA-A*32:01 | RISEMGVCF | 0.605153 | 0.09 |
| HLA-A*32:01 | YIMAFNPPW | 0.564707 | 0.1 |
| HLA-A*32:01 | KQSPFQNAY | 0.554599 | 0.1 |
| HLA-A*32:01 | ETFPTVSQF | 0.436286 | 0.16 |
| HLA-A*32:01 | GIVKKGLEW | 0.433896 | 0.16 |
| HLA-A*32:01 | IVMSVKEML | 0.285936 | 0.36 |
| HLA-A*32:01 | KTIVKLFEV | 0.275418 | 0.39 |
| HLA-A*32:01 | KGNGLVDTF | 0.27011 | 0.4 |
| HLA-A*32:01 | QSAQIDTAF | 0.238621 | 0.46 |
| HLA-A*32:01 | DTFTNSYSF | 0.237373 | 0.46 |
| HLA-A*32:01 | SLVGKQSPF | 0.233629 | 0.47 |
| HLA-A*32:01 | KNAGTIKSW | 0.232305 | 0.47 |
| HLA-A*32:01 | KALLSTPMKW | 0.388658 | 0.22 |
| HLA-A*32:01 | KLFEVQKTGF | 0.659254 | 0.07 |
|  |  |  |  |
| HLA-A*33:03 | HTKSILNLR | 0.873108 | 0.01 |
| HLA-A*33:03 | MLSDMIRRR | 0.592986 | 0.08 |
| HLA-A*33:03 | EMLSDMIRR | 0.516757 | 0.12 |
| HLA-A*33:03 | LYKNSSALR | 0.475072 | 0.16 |
| HLA-A*33:03 | ELYKNSSALR | 0.450381 | 0.18 |
| HLA-A*33:03 | GHTKSILNLR | 0.346745 | 0.31 |
| HLA-A*33:03 | EMLSDMIRRR | 0.297489 | 0.4 |
|  |  |  |  |
| HLA-A*68:01 | HTKSILNLR | 0.893497 | 0.02 |
| HLA-A*68:01 | DSMITNLLK | 0.726496 | 0.13 |
| HLA-A*68:01 | MLSDMIRRR | 0.615473 | 0.25 |
| HLA-A*68:01 | EMLSDMIRR | 0.613473 | 0.25 |
| HLA-A*68:01 | WVSSTGIVK | 0.560866 | 0.32 |
| HLA-A*68:01 | ASALVEATK | 0.505761 | 0.43 |
| HLA-A*68:01 | HIAKAQELY | 0.502075 | 0.44 |
| HLA-A*68:01 | YASALVEATK | 0.607334 | 0.26 |
| HLA-A*68:01 | EVNNKDEMNR | 0.489421 | 0.46 |
| HLA-A*68:01 | HIAKAQELYK | 0.485734 | 0.47 |
| HLA-A*68:01 | ELYKNSSALR | 0.518295 | 0.41 |
|  |  |  |  |
| HLA-A*68:02 | NTAALSNKV | 0.919226 | 0.01 |
| HLA-A*68:02 | DSIYASALV | 0.748586 | 0.06 |
| HLA-A*68:02 | VTPETFPTV | 0.649326 | 0.12 |
| HLA-A*68:02 | RIYMHPAVL | 0.559589 | 0.17 |
| HLA-A*68:02 | ETFPTVSQF | 0.555803 | 0.18 |
| HLA-A*68:02 | EVQKTGFNI | 0.519972 | 0.21 |
| HLA-A*68:02 | NSYSFCESV | 0.493978 | 0.24 |
| HLA-A*68:02 | DIVASEHLL | 0.431374 | 0.31 |
| HLA-A*68:02 | LVATGLAKL | 0.412724 | 0.33 |
| HLA-A*68:02 | LTAGRISEM | 0.387389 | 0.37 |
| HLA-A*68:02 | TAFSSYYWL | 0.354847 | 0.42 |
| HLA-A*68:02 | IVMSVKEML | 0.327198 | 0.47 |
| HLA-A*68:02 | DTFTNSYSF | 0.324275 | 0.48 |
| HLA-A*68:02 | SVPNLDRFV | 0.318417 | 0.49 |
| HLA-A*68:02 | ETFPTVSQFL | 0.687784 | 0.1 |
| HLA-A*68:02 | MAFNPPWGDI | 0.370823 | 0.39 |
| HLA-A*68:02 | KVPGEIVMSV | 0.321838 | 0.48 |
| HLA-A*68:02 | DTAFSSYYWL | 0.321577 | 0.48 |
|  |  |  |  |
| HLA-A*74:01 | MLSDMIRRR | 0.325371 | 0.1 |
| HLA-A*74:01 | HTKSILNLR | 0.304353 | 0.11 |
| HLA-A*74:01 | IVKLFEVQK | 0.20942 | 0.22 |
| HLA-A*74:01 | ALVATGLAK | 0.163822 | 0.32 |
| HLA-A*74:01 | KTVEALNGY | 0.162817 | 0.32 |
| HLA-A*74:01 | ASALVEATK | 0.140242 | 0.38 |
| HLA-A*74:01 | LLHQSLVGK | 0.133903 | 0.42 |
| HLA-A*74:01 | VSSTGIVKK | 0.119236 | 0.49 |
| HLA-A*74:01 | SQFLFELGK | 0.118239 | 0.49 |
| HLA-A*74:01 | KEMLSDMIRR | 0.197532 | 0.23 |
|  |  |  |  |
| HLA-B*07:02 | VPNLDRFVF | 0.879983 | 0.04 |
| HLA-B*07:02 | RVNANTAAL | 0.711955 | 0.09 |
| HLA-B*07:02 | VPGEIVMSV | 0.579712 | 0.17 |
| HLA-B*07:02 | SPFQNAYNV | 0.497413 | 0.21 |
| HLA-B*07:02 | RIYMHPAVL | 0.412342 | 0.29 |
| HLA-B*07:02 | MIRRRNLIL | 0.269744 | 0.49 |
| HLA-B*07:02 | STPMKWGKKL | 0.628812 | 0.13 |
| HLA-B*07:02 | SVPNLDRFVF | 0.520456 | 0.2 |
| HLA-B*07:02 | NPCAKTIVKL | 0.34777 | 0.37 |
|  |  |  |  |
| HLA-B*08:01 | MIRRRNLIL | 0.843307 | 0.02 |
| HLA-B*08:01 | ELYKNSSAL | 0.666044 | 0.07 |
| HLA-B*08:01 | DMIRRRNLI | 0.654187 | 0.07 |
| HLA-B*08:01 | RIYMHPAVL | 0.650904 | 0.07 |
| HLA-B*08:01 | EAKKTVEAL | 0.645122 | 0.08 |
| HLA-B*08:01 | TKKMKKALL | 0.577123 | 0.13 |
| HLA-B*08:01 | SDMIRRRNL | 0.512174 | 0.18 |
| HLA-B*08:01 | TPMKWGKKL | 0.371205 | 0.35 |
| HLA-B*08:01 | RVNANTAAL | 0.313655 | 0.46 |
| HLA-B*08:01 | DMIRRRNLIL | 0.332455 | 0.42 |
|  |  |  |  |
| HLA-B*13:01 | AEYKVPGEI | 0.645042 | 0.04 |
| HLA-B*13:01 | YELFADDSF | 0.549116 | 0.07 |
| HLA-B*13:01 | REFVKGKYI | 0.526011 | 0.09 |
| HLA-B*13:01 | KQSPFQNAY | 0.345844 | 0.29 |
| HLA-B*13:01 | SEHLLHQSL | 0.467475 | 0.12 |
| HLA-B*13:01 | ALLSTPMKW | 0.435005 | 0.16 |
| HLA-B*13:01 | VDVPKIEQL | 0.396103 | 0.21 |
| HLA-B*13:01 | AETEGKGIF | 0.379428 | 0.23 |
| HLA-B*13:01 | ADSMITNLL | 0.379057 | 0.23 |
| HLA-B*13:01 | ETFPTVSQF | 0.310978 | 0.36 |
| HLA-B*13:01 | AQIDTAFSSY | 0.315299 | 0.36 |
| HLA-B*13:01 | AQSAQIDTAF | 0.477505 | 0.12 |
| HLA-B*13:01 | AEYKVPGEIVM | 0.371302 | 0.25 |
|  |  |  |  |
| HLA-B*13:02 | AEYKVPGEI | 0.637517 | 0.02 |
| HLA-B*13:02 | REFVKGKYI | 0.507264 | 0.05 |
| HLA-B*13:02 | SEHLLHQSL | 0.317865 | 0.25 |
| HLA-B*13:02 | ADSMITNLL | 0.30441 | 0.28 |
| HLA-B*13:02 | VDVPKIEQL | 0.30375 | 0.28 |
| HLA-B*13:02 | YELFADDSF | 0.272974 | 0.35 |
| HLA-B*13:02 | MDIVASEHL | 0.232451 | 0.49 |
| HLA-B*13:02 | YMHPAVLTA | 0.232206 | 0.49 |
| HLA-B*13:02 | AEYKVPGEIV | 0.445502 | 0.08 |
| HLA-B*13:02 | TELKVDVPKI | 0.313882 | 0.27 |
| HLA-B*13:02 | SEMGVCFGTI | 0.261895 | 0.38 |
| HLA-B*13:02 | AEYKVPGEIVM | 0.250303 | 0.41 |
|  |  |  |  |
| HLA-B*14:02 | NRIYMHPAV | 0.537404 | 0.03 |
| HLA-B*14:02 | KHIAKAQEL | 0.359757 | 0.09 |
| HLA-B*14:02 | ELYKNSSAL | 0.359362 | 0.09 |
| HLA-B*14:02 | RIYMHPAVL | 0.312425 | 0.13 |
| HLA-B*14:02 | EHLLHQSL | 0.245915 | 0.23 |
| HLA-B*14:02 | YKVPGEIVM | 0.24544 | 0.23 |
| HLA-B*14:02 | WRKDIGFRV | 0.223236 | 0.26 |
| HLA-B*14:02 | EHVDWCREF | 0.206874 | 0.3 |
| HLA-B*14:02 | EAKKTVEAL | 0.193562 | 0.34 |
| HLA-B*14:02 | RVNANTAAL | 0.180019 | 0.4 |
| HLA-B*14:02 | EEFKKGNGL | 0.179874 | 0.4 |
| HLA-B*14:02 | MIRRRNLIL | 0.175651 | 0.41 |
| HLA-B*14:02 | SEHLLHQSL | 0.166128 | 0.45 |
| HLA-B*14:02 | GHTKSILNL | 0.165922 | 0.45 |
| HLA-B*14:02 | DRASADSMI | 0.1643 | 0.45 |
| HLA-B*14:02 | DTFTNSYSF | 0.164271 | 0.45 |
| HLA-B*14:02 | EHLLHQSLV | 0.154524 | 0.49 |
| HLA-B*14:02 | NRIYMHPAVL | 0.518583 | 0.03 |
| HLA-B*14:02 | FRVNANTAAL | 0.256374 | 0.2 |
|  |  |  |  |
| HLA-B*15:01 | KQSPFQNAY | 0.967003 | 0.01 |
| HLA-B*15:01 | KTVEALNGY | 0.77272 | 0.06 |
| HLA-B*15:01 | LVDTFTNSY | 0.379346 | 0.43 |
| HLA-B*15:01 | HIAKAQELY | 0.689374 | 0.11 |
| HLA-B*15:01 | TIKSWDESY | 0.659396 | 0.12 |
| HLA-B*15:01 | LSNKVLAEY | 0.576094 | 0.18 |
| HLA-B*15:01 | SLVGKQSPF | 0.568106 | 0.18 |
| HLA-B*15:01 | RISEMGVCF | 0.547378 | 0.21 |
| HLA-B*15:01 | QSAQIDTAF | 0.529831 | 0.22 |
| HLA-B*15:01 | ETFPTVSQF | 0.51832 | 0.23 |
| HLA-B*15:01 | IVKKGLEWF | 0.334293 | 0.5 |
| HLA-B*15:01 | QIDTAFSSY | 0.33233 | 0.5 |
| HLA-B*15:01 | RVNANTAAL | 0.409552 | 0.39 |
| HLA-B*15:01 | AQIDTAFSSY | 0.972483 | 0.01 |
| HLA-B*15:01 | AQSAQIDTAF | 0.869577 | 0.02 |
| HLA-B*15:01 | GKQSPFQNAY | 0.794087 | 0.05 |
| HLA-B*15:01 | GLVDTFTNSY | 0.775425 | 0.05 |
| HLA-B*15:01 | KQSPFQNAYN | 0.47561 | 0.28 |
| HLA-B*15:01 | ALSNKVLAEY | 0.435359 | 0.35 |
| HLA-B*15:01 | KLFEVQKTGF | 0.423335 | 0.37 |
| HLA-B*15:01 | AQIDTAFSSYY | 0.72617 | 0.09 |
| HLA-B*15:01 | SAQIDTAFSSY | 0.349218 | 0.48 |
|  |  |  |  |
| HLA-B*15:02 | ETFPTVSQF | 0.676925 | 0.04 |
| HLA-B*15:02 | KQSPFQNAY | 0.621983 | 0.07 |
| HLA-B*15:02 | HIAKAQELY | 0.555913 | 0.09 |
| HLA-B*15:02 | LVDTFTNSY | 0.53782 | 0.1 |
| HLA-B*15:02 | TIKSWDESY | 0.529061 | 0.1 |
| HLA-B*15:02 | DTFTNSYSF | 0.514862 | 0.11 |
| HLA-B*15:02 | QIDTAFSSY | 0.483204 | 0.13 |
| HLA-B*15:02 | QSAQIDTAF | 0.482008 | 0.13 |
| HLA-B*15:02 | SLVGKQSPF | 0.409944 | 0.17 |
| HLA-B*15:02 | KTVEALNGY | 0.387077 | 0.19 |
| HLA-B*15:02 | DSFQQNRIY | 0.358501 | 0.21 |
| HLA-B*15:02 | ELYKNSSAL | 0.315088 | 0.26 |
| HLA-B*15:02 | SALVEATKF | 0.268244 | 0.34 |
| HLA-B*15:02 | LSNKVLAEY | 0.256062 | 0.37 |
| HLA-B*15:02 | VPNLDRFVF | 0.255121 | 0.37 |
| HLA-B*15:02 | RISEMGVCF | 0.242382 | 0.39 |
| HLA-B*15:02 | RVNANTAAL | 0.228644 | 0.42 |
| HLA-B*15:02 | YMHPAVLTA | 0.214688 | 0.45 |
| HLA-B*15:02 | AQIDTAFSSY | 0.670976 | 0.05 |
| HLA-B*15:02 | GLVDTFTNSY | 0.415316 | 0.16 |
| HLA-B*15:02 | AQSAQIDTAF | 0.231749 | 0.4 |
|  |  |  |  |
| HLA-B*15:25 | KQSPFQNAY | 0.95598 | 0.01 |
| HLA-B*15:25 | KTVEALNGY | 0.735181 | 0.07 |
| HLA-B*15:25 | HIAKAQELY | 0.601339 | 0.14 |
| HLA-B*15:25 | SLVGKQSPF | 0.568706 | 0.17 |
| HLA-B*15:25 | LVDTFTNSY | 0.558209 | 0.18 |
| HLA-B*15:25 | RISEMGVCF | 0.539432 | 0.19 |
| HLA-B*15:25 | ETFPTVSQF | 0.533035 | 0.19 |
| HLA-B*15:25 | TIKSWDESY | 0.521363 | 0.2 |
| HLA-B*15:25 | QSAQIDTAF | 0.470684 | 0.26 |
| HLA-B*15:25 | LSNKVLAEY | 0.467246 | 0.27 |
| HLA-B*15:25 | RVNANTAAL | 0.451961 | 0.28 |
| HLA-B*15:25 | RIYMHPAVL | 0.434502 | 0.3 |
| HLA-B*15:25 | QIDTAFSSY | 0.425149 | 0.32 |
| HLA-B*15:25 | KLFEVQKTGF | 0.404208 | 0.34 |
| HLA-B*15:25 | YMHPAVLTA | 0.392537 | 0.37 |
| HLA-B*15:25 | ALSNKVLAEY | 0.3859 | 0.38 |
| HLA-B*15:25 | AQIDTAFSSY | 0.933595 | 0.01 |
| HLA-B*15:25 | GLVDTFTNSY | 0.72341 | 0.07 |
| HLA-B*15:25 | AQSAQIDTAF | 0.709704 | 0.08 |
| HLA-B*15:25 | GKQSPFQNAY | 0.6194 | 0.13 |
| HLA-B*15:25 | AQIDTAFSSYY | 0.593236 | 0.15 |
|  |  |  |  |
| HLA-B*18:01 | YELFADDSF | 0.829831 | 0.03 |
| HLA-B*18:01 | SEHLLHQSL | 0.645047 | 0.07 |
| HLA-B*18:01 | EEFKKGNGL | 0.629917 | 0.07 |
| HLA-B*18:01 | AETEGKGIF | 0.473549 | 0.14 |
| HLA-B*18:01 | IEVNNKDEM | 0.271684 | 0.31 |
| HLA-B*18:01 | DEAKKTVEA | 0.241134 | 0.36 |
| HLA-B*18:01 | KQSPFQNAY | 0.20455 | 0.41 |
| HLA-B*18:01 | DESYTELKV | 0.199122 | 0.43 |
| HLA-B*18:01 | DENPRGPVS | 0.189331 | 0.46 |
| HLA-B*18:01 | DDAQKDSIY | 0.173229 | 0.5 |
| HLA-B*18:01 | REFVKGKYIM | 0.171882 | 0.5 |
| HLA-B*18:01 | DEMNRWFEEF | 0.526751 | 0.12 |
| HLA-B*18:01 | HEHVDWCREF | 0.267204 | 0.31 |
| HLA-B*18:01 | AQIDTAFSSY | 0.183185 | 0.47 |
|  |  |  |  |
| HLA-B*27:02 | WRKDIGFRV | 0.744194 | 0.2 |
| HLA-B*27:02 | GRISEMGVCF | 0.924559 | 0.07 |
|  |  |  |  |
| HLA-B*27:05 | WRKDIGFRV | 0.801681 | 0.12 |
| HLA-B*27:05 | RRRNLILNR | 0.737118 | 0.16 |
| HLA-B*27:05 | NRWFEEFKK | 0.691859 | 0.2 |
| HLA-B*27:05 | GRSGIALVA | 0.567518 | 0.33 |
| HLA-B*27:05 | GRISEMGVCF | 0.830032 | 0.1 |
|  |  |  |  |
| HLA-B*35:01 | VPNLDRFVF | 0.949747 | 0.02 |
| HLA-B*35:01 | FPTVSQFLF | 0.885602 | 0.04 |
| HLA-B*35:01 | DTFTNSYSF | 0.822763 | 0.07 |
| HLA-B*35:01 | LVDTFTNSY | 0.799865 | 0.08 |
| HLA-B*35:01 | ESVPNLDRF | 0.314239 | 0.47 |
| HLA-B*35:01 | ETFPTVSQF | 0.686051 | 0.14 |
| HLA-B*35:01 | QSAQIDTAF | 0.625987 | 0.16 |
| HLA-B*35:01 | HIAKAQELY | 0.609979 | 0.17 |
| HLA-B*35:01 | DSFQQNRIY | 0.556877 | 0.21 |
| HLA-B*35:01 | QIDTAFSSY | 0.521556 | 0.23 |
| HLA-B*35:01 | SPFQNAYNV | 0.463726 | 0.28 |
| HLA-B*35:01 | SALVEATKF | 0.445074 | 0.3 |
| HLA-B*35:01 | TPMKWGKKL | 0.438916 | 0.3 |
| HLA-B*35:01 | LSNKVLAEY | 0.408802 | 0.34 |
| HLA-B*35:01 | TIKSWDESY | 0.370699 | 0.38 |
| HLA-B*35:01 | VPGEIVMSV | 0.362666 | 0.39 |
| HLA-B*35:01 | TPMKWGKKLY | 0.420601 | 0.33 |
| HLA-B*35:01 | SVPNLDRFVF | 0.300518 | 0.49 |
| HLA-B*35:01 | VPKIEQLTGY | 0.711541 | 0.13 |
| HLA-B*35:01 | TPETFPTVSQF | 0.293903 | 0.5 |
|  |  |  |  |
| HLA-B*35:03 | FPTVSQFLF | 0.625123 | 0.06 |
| HLA-B*35:03 | SPFQNAYNV | 0.604668 | 0.07 |
| HLA-B*35:03 | VPNLDRFVF | 0.589899 | 0.07 |
| HLA-B*35:03 | VPGEIVMSV | 0.524912 | 0.09 |
| HLA-B*35:03 | TPMKWGKKL | 0.509342 | 0.09 |
| HLA-B*35:03 | DTFTNSYSF | 0.209614 | 0.27 |
| HLA-B*35:03 | SADSMITNL | 0.208245 | 0.28 |
| HLA-B*35:03 | EAKKTVEAL | 0.190728 | 0.31 |
| HLA-B*35:03 | TAALSNKVL | 0.188568 | 0.31 |
| HLA-B*35:03 | NPCAKTIVKL | 0.211735 | 0.27 |
|  |  |  |  |
| HLA-B*37:01 | SEHLLHQSL | 0.808322 | 0.02 |
| HLA-B*37:01 | VDVPKIEQL | 0.803617 | 0.02 |
| HLA-B*37:01 | REFVKGKYI | 0.761916 | 0.03 |
| HLA-B*37:01 | ADSMITNLL | 0.661958 | 0.06 |
| HLA-B*37:01 | AEYKVPGEI | 0.628043 | 0.07 |
| HLA-B*37:01 | SDMIRRRNL | 0.555155 | 0.1 |
| HLA-B*37:01 | MDIVASEHL | 0.532036 | 0.11 |
| HLA-B*37:01 | KDSIYASAL | 0.508781 | 0.13 |
| HLA-B*37:01 | EEFKKGNGL | 0.508627 | 0.13 |
| HLA-B*37:01 | YELFADDSF | 0.404353 | 0.25 |
| HLA-B*37:01 | AETEGKGIF | 0.341347 | 0.36 |
| HLA-B*37:01 | IEVNNKDEM | 0.302454 | 0.43 |
| HLA-B*37:01 | REFVKGKYIM | 0.349868 | 0.34 |
| HLA-B*37:01 | FEEFKKGNGL | 0.339128 | 0.36 |
| HLA-B*37:01 | AEYKVPGEIV | 0.30728 | 0.42 |
| HLA-B*37:01 | AEYKVPGEIVM | 0.320323 | 0.39 |
|  |  |  |  |
| HLA-B*38:01 | YKVPGEIVM | 0.507224 | 0.08 |
| HLA-B*38:01 | EHVDWCREF | 0.498152 | 0.08 |
| HLA-B*38:01 | GHTKSILNL | 0.451051 | 0.1 |
| HLA-B*38:01 | KHIAKAQEL | 0.370727 | 0.15 |
| HLA-B*38:01 | YELFADDSF | 0.344886 | 0.19 |
| HLA-B*38:01 | DRASADSMI | 0.301365 | 0.25 |
| HLA-B*38:01 | NKDEMNRWF | 0.282858 | 0.28 |
| HLA-B*38:01 | SEHLLHQSL | 0.256306 | 0.34 |
| HLA-B*38:01 | NRIYMHPAV | 0.23936 | 0.37 |
| HLA-B*38:01 | WRKDIGFRV | 0.226584 | 0.41 |
| HLA-B*38:01 | EEFKKGNGL | 0.19533 | 0.49 |
| HLA-B*38:01 | EHLLHQSLV | 0.192929 | 0.49 |
| HLA-B*38:01 | YKAGVTPETF | 0.297379 | 0.25 |
| HLA-B*38:01 | FRVNANTAAL | 0.229397 | 0.4 |
| HLA-B*38:01 | NRIYMHPAVL | 0.217337 | 0.43 |
|  |  |  |  |
| HLA-B*39:01 | YKVPGEIVM | 0.84043 | 0.02 |
| HLA-B*39:01 | NRIYMHPAV | 0.634529 | 0.09 |
| HLA-B*39:01 | KHIAKAQEL | 0.560471 | 0.13 |
| HLA-B*39:01 | GHTKSILNL | 0.477567 | 0.18 |
| HLA-B*39:01 | FRVNANTAA | 0.392938 | 0.25 |
| HLA-B*39:01 | WRKDIGFRV | 0.341913 | 0.31 |
| HLA-B*39:01 | EHVDWCREF | 0.313976 | 0.36 |
| HLA-B*39:01 | DRASADSMI | 0.312141 | 0.36 |
| HLA-B*39:01 | SEHLLHQSL | 0.283286 | 0.42 |
| HLA-B*39:01 | FRVNANTAAL | 0.714795 | 0.06 |
| HLA-B*39:01 | NRIYMHPAVL | 0.563923 | 0.12 |
|  |  |  |  |
| HLA-B*40:01 | SEHLLHQSL | 0.97911 | 0.02 |
| HLA-B*40:01 | AEYKVPGEI | 0.95336 | 0.04 |
| HLA-B*40:01 | AEYKVPGEIVM | 0.949875 | 0.04 |
| HLA-B*40:01 | YELFADDSF | 0.814979 | 0.14 |
| HLA-B*40:01 | EEFKKGNGL | 0.804566 | 0.14 |
| HLA-B*40:01 | REFVKGKYI | 0.774839 | 0.16 |
| HLA-B*40:01 | IEVNNKDEM | 0.727465 | 0.21 |
| HLA-B*40:01 | AETEGKGIF | 0.830949 | 0.12 |
| HLA-B*40:01 | SEMGVCFGTI | 0.458744 | 0.45 |
| HLA-B*40:01 | FEEFKKGNGL | 0.7693 | 0.17 |
| HLA-B*40:01 | AEYKVPGEIV | 0.756592 | 0.18 |
| HLA-B*40:01 | ASEHLLHQSL | 0.681625 | 0.23 |
| HLA-B*40:01 | GEIVMSVKEM | 0.66486 | 0.25 |
| HLA-B*40:01 | QELYKNSSAL | 0.662732 | 0.25 |
| HLA-B*40:01 | REFVKGKYIM | 0.842075 | 0.12 |
| HLA-B*40:01 | GEIVMSVKEML | 0.614287 | 0.3 |
|  |  |  |  |
| HLA-B*40:02 | SEHLLHQSL | 0.974194 | 0.01 |
| HLA-B*40:02 | AEYKVPGEI | 0.92572 | 0.04 |
| HLA-B*40:02 | REFVKGKYI | 0.855261 | 0.07 |
| HLA-B*40:02 | EEFKKGNGL | 0.659994 | 0.19 |
| HLA-B*40:02 | AETEGKGIF | 0.594656 | 0.23 |
| HLA-B*40:02 | YELFADDSF | 0.592274 | 0.24 |
| HLA-B*40:02 | VDVPKIEQL | 0.521687 | 0.31 |
| HLA-B*40:02 | IEVNNKDEM | 0.515372 | 0.32 |
| HLA-B*40:02 | ADSMITNLL | 0.481942 | 0.35 |
| HLA-B*40:02 | QELYKNSSAL | 0.480457 | 0.36 |
| HLA-B*40:02 | REFVKGKYIM | 0.822275 | 0.08 |
| HLA-B*40:02 | AEYKVPGEIV | 0.728446 | 0.15 |
| HLA-B*40:02 | ASEHLLHQSL | 0.622591 | 0.22 |
| HLA-B*40:02 | FEEFKKGNGL | 0.593571 | 0.23 |
| HLA-B*40:02 | GEIVMSVKEM | 0.535028 | 0.3 |
| HLA-B*40:02 | AEYKVPGEIVM | 0.899805 | 0.05 |
|  |  |  |  |
| HLA-B*44:02 | AETEGKGIF | 0.818123 | 0.06 |
| HLA-B*44:02 | SEHLLHQSL | 0.768253 | 0.08 |
| HLA-B*44:02 | AEYKVPGEI | 0.640658 | 0.14 |
| HLA-B*44:02 | EEFKKGNGL | 0.605275 | 0.17 |
| HLA-B*44:02 | REFVKGKYI | 0.55652 | 0.21 |
| HLA-B*44:02 | YELFADDSF | 0.432347 | 0.3 |
| HLA-B*44:02 | DEMNRWFEEF | 0.376527 | 0.36 |
| HLA-B*44:02 | GEIVMSVKEM | 0.316976 | 0.42 |
| HLA-B*44:02 | ASEHLLHQSL | 0.289371 | 0.47 |
| HLA-B*44:02 | AEYKVPGEIV | 0.267181 | 0.5 |
| HLA-B*44:02 | HEHVDWCREF | 0.51084 | 0.25 |
| HLA-B*44:02 | FEKNAGTIKSW | 0.771651 | 0.08 |
|  |  |  |  |
| HLA-B*44:03 | AETEGKGIF | 0.828911 | 0.07 |
| HLA-B*44:03 | SEHLLHQSL | 0.780718 | 0.08 |
| HLA-B*44:03 | AEYKVPGEI | 0.689508 | 0.13 |
| HLA-B*44:03 | EEFKKGNGL | 0.669183 | 0.13 |
| HLA-B*44:03 | YELFADDSF | 0.557171 | 0.21 |
| HLA-B*44:03 | REFVKGKYI | 0.526104 | 0.23 |
| HLA-B*44:03 | HEHVDWCREF | 0.487668 | 0.25 |
| HLA-B*44:03 | GEIVMSVKEM | 0.330432 | 0.42 |
| HLA-B*44:03 | DEMNRWFEEF | 0.320789 | 0.42 |
| HLA-B*44:03 | AQIDTAFSSY | 0.297057 | 0.45 |
| HLA-B*44:03 | AEYKVPGEIV | 0.293366 | 0.46 |
| HLA-B*44:03 | FEKNAGTIKSW | 0.641026 | 0.15 |
|  |  |  |  |
| HLA-B*46:01 | RVNANTAAL | 0.140177 | 0.05 |
| HLA-B*46:01 | ETFPTVSQF | 0.132715 | 0.06 |
| HLA-B*46:01 | KTVEALNGY | 0.109293 | 0.08 |
| HLA-B*46:01 | LSNKVLAEY | 0.102225 | 0.09 |
| HLA-B*46:01 | LTAGRISEM | 0.101381 | 0.09 |
| HLA-B*46:01 | QSAQIDTAF | 0.100611 | 0.09 |
| HLA-B*46:01 | RIYMHPAVL | 0.070555 | 0.15 |
| HLA-B*46:01 | KQSPFQNAY | 0.05887 | 0.18 |
| HLA-B*46:01 | YMHPAVLTA | 0.057598 | 0.19 |
| HLA-B*46:01 | LVDTFTNSY | 0.048211 | 0.24 |
| HLA-B*46:01 | RISEMGVCF | 0.043614 | 0.27 |
| HLA-B*46:01 | SLVGKQSPF | 0.03679 | 0.32 |
| HLA-B*46:01 | DTFTNSYSF | 0.03546 | 0.33 |
| HLA-B*46:01 | HIAKAQELY | 0.034288 | 0.34 |
| HLA-B*46:01 | SVKEMLSDM | 0.028383 | 0.39 |
| HLA-B*46:01 | ELYKNSSAL | 0.027607 | 0.4 |
| HLA-B*46:01 | LVATGLAKL | 0.023238 | 0.47 |
| HLA-B*46:01 | KGNGLVDTF | 0.022761 | 0.48 |
| HLA-B*46:01 | TIKSWDESY | 0.022526 | 0.49 |
| HLA-B*46:01 | SALVEATKF | 0.022051 | 0.5 |
| HLA-B*46:01 | AQIDTAFSSY | 0.032908 | 0.36 |
|  |  |  |  |
| HLA-B*48:01 | SEHLLHQSL | 0.407021 | 0.06 |
| HLA-B*48:01 | YKVPGEIVM | 0.38759 | 0.06 |
| HLA-B*48:01 | RIYMHPAVL | 0.324508 | 0.1 |
| HLA-B*48:01 | AEYKVPGEI | 0.302675 | 0.11 |
| HLA-B*48:01 | KHIAKAQEL | 0.206942 | 0.22 |
| HLA-B*48:01 | REFVKGKYI | 0.198171 | 0.24 |
| HLA-B*48:01 | RVNANTAAL | 0.184375 | 0.26 |
| HLA-B*48:01 | KQSPFQNAY | 0.138568 | 0.4 |
| HLA-B*48:01 | GHTKSILNL | 0.122251 | 0.48 |
| HLA-B*48:01 | REFVKGKYIM | 0.194871 | 0.25 |
| HLA-B*48:01 | AQSAQIDTAF | 0.15461 | 0.35 |
| HLA-B*48:01 | AEYKVPGEIVM | 0.168575 | 0.3 |
| HLA-B*48:01 | AQKDSIYASAL | 0.130657 | 0.44 |
|  |  |  |  |
| HLA-B*49:01 | AEYKVPGEI | 0.921745 | 0.01 |
| HLA-B*49:01 | REFVKGKYI | 0.915219 | 0.01 |
| HLA-B*49:01 | AETEGKGIF | 0.261661 | 0.44 |
| HLA-B*49:01 | SEHLLHQSL | 0.65429 | 0.07 |
| HLA-B*49:01 | YELFADDSF | 0.314022 | 0.34 |
| HLA-B*49:01 | EEFKKGNGL | 0.307844 | 0.34 |
| HLA-B*49:01 | LAEYKVPGEI | 0.277486 | 0.4 |
| HLA-B*49:01 | SEHLLHQSLV | 0.241119 | 0.48 |
| HLA-B*49:01 | TELKVDVPKI | 0.468106 | 0.17 |
| HLA-B*49:01 | REFVKGKYIM | 0.322146 | 0.31 |
| HLA-B*49:01 | SEMGVCFGTI | 0.376272 | 0.25 |
| HLA-B*49:01 | AEYKVPGEIV | 0.777758 | 0.04 |
| HLA-B*49:01 | AEYKVPGEIVM | 0.347394 | 0.28 |
|  |  |  |  |
| HLA-B*50:01 | AETEGKGIF | 0.246749 | 0.47 |
| HLA-B*50:01 | REFVKGKYI | 0.699562 | 0.09 |
| HLA-B*50:01 | SEHLLHQSL | 0.660641 | 0.1 |
| HLA-B*50:01 | KDIGFRVNA | 0.283065 | 0.42 |
| HLA-B*50:01 | QELYKNSSA | 0.58235 | 0.14 |
| HLA-B*50:01 | IEQLTGYQQA | 0.375333 | 0.3 |
| HLA-B*50:01 | REFVKGKYIM | 0.334048 | 0.35 |
| HLA-B*50:01 | AQELYKNSSA | 0.281985 | 0.42 |
| HLA-B*50:01 | FDEAKKTVEA | 0.28175 | 0.43 |
| HLA-B*50:01 | AEYKVPGEIV | 0.641747 | 0.11 |
| HLA-B*50:01 | AEYKVPGEIVM | 0.389252 | 0.28 |
|  |  |  |  |
| HLA-B*51:01 | VPGEIVMSV | 0.916995 | 0.01 |
| HLA-B*51:01 | SPFQNAYNV | 0.870618 | 0.03 |
| HLA-B*51:01 | FPTVSQFLF | 0.468091 | 0.25 |
| HLA-B*51:01 | TPMKWGKKL | 0.453414 | 0.27 |
| HLA-B*51:01 | DSIYASALV | 0.405425 | 0.34 |
| HLA-B*51:01 | VTPETFPTV | 0.39236 | 0.36 |
| HLA-B*51:01 | TAFSSYYWL | 0.347784 | 0.43 |
| HLA-B*51:01 | DTFTNSYSF | 0.341316 | 0.44 |
|  |  |  |  |
| HLA-B*52:01 | REFVKGKYI | 0.446634 | 0.03 |
| HLA-B*52:01 | AEYKVPGEI | 0.408146 | 0.04 |
| HLA-B*52:01 | VTPETFPTV | 0.304903 | 0.11 |
| HLA-B*52:01 | RIYMHPAVL | 0.228733 | 0.23 |
| HLA-B*52:01 | VPGEIVMSV | 0.18976 | 0.35 |
| HLA-B*52:01 | ETFPTVSQF | 0.181658 | 0.38 |
| HLA-B*52:01 | VDVPKIEQL | 0.166593 | 0.45 |
| HLA-B*52:01 | SPFQNAYNV | 0.161148 | 0.47 |
|  |  |  |  |
| HLA-B*53:01 | FPTVSQFLF | 0.902706 | 0.02 |
| HLA-B*53:01 | VPNLDRFVF | 0.876382 | 0.02 |
| HLA-B*53:01 | DTAFSSYYW | 0.679754 | 0.07 |
| HLA-B*53:01 | DTFTNSYSF | 0.627497 | 0.09 |
| HLA-B*53:01 | VPGEIVMSV | 0.599842 | 0.1 |
| HLA-B*53:01 | ETFPTVSQF | 0.588548 | 0.11 |
| HLA-B*53:01 | SPFQNAYNV | 0.545388 | 0.12 |
| HLA-B*53:01 | ALLSTPMKW | 0.219828 | 0.5 |
| HLA-B*53:01 | TAFSSYYW | 0.445175 | 0.18 |
| HLA-B*53:01 | TPMKWGKKL | 0.42359 | 0.2 |
| HLA-B*53:01 | SALVEATKF | 0.403159 | 0.22 |
| HLA-B*53:01 | YIMAFNPPW | 0.401953 | 0.22 |
| HLA-B*53:01 | ESVPNLDRF | 0.30916 | 0.32 |
| HLA-B*53:01 | DSFQQNRIY | 0.279023 | 0.37 |
| HLA-B*53:01 | LVDTFTNSY | 0.26757 | 0.39 |
| HLA-B*53:01 | QSAQIDTAF | 0.246773 | 0.44 |
| HLA-B*53:01 | SVPNLDRFVF | 0.240451 | 0.45 |
| HLA-B*53:01 | TPMKWGKKLY | 0.238952 | 0.45 |
| HLA-B*53:01 | GPVSHEHVDW | 0.53515 | 0.13 |
| HLA-B*53:01 | VPKIEQLTGY | 0.357042 | 0.27 |
| HLA-B*53:01 | TPETFPTVSQF | 0.341648 | 0.27 |
|  |  |  |  |
| HLA-B*55:01 | VPGEIVMSV | 0.680768 | 0.02 |
| HLA-B*55:01 | SPFQNAYNV | 0.646542 | 0.03 |
| HLA-B*55:01 | TPMKWGKKL | 0.388501 | 0.15 |
| HLA-B*55:01 | VPNLDRFVF | 0.294079 | 0.22 |
| HLA-B*55:01 | RIYMHPAVL | 0.233288 | 0.35 |
| HLA-B*55:01 | RVNANTAAL | 0.220227 | 0.39 |
| HLA-B*55:01 | YMHPAVLTA | 0.183425 | 0.5 |
|  |  |  |  |
| HLA-B*56:01 | SPFQNAYNV | 0.728571 | 0.01 |
| HLA-B*56:01 | VPGEIVMSV | 0.724602 | 0.01 |
| HLA-B*56:01 | TPMKWGKKL | 0.356552 | 0.16 |
| HLA-B*56:01 | VPNLDRFVF | 0.33844 | 0.18 |
| HLA-B*56:01 | FPTVSQFLF | 0.303136 | 0.23 |
| HLA-B*56:01 | IPVANPDDA | 0.198996 | 0.44 |
| HLA-B*56:01 | IPVANPDDAA | 0.182751 | 0.5 |
|  |  |  |  |
| HLA-B*57:01 | KTVEALNGY | 0.838909 | 0.05 |
| HLA-B*57:01 | KNAGTIKSW | 0.804793 | 0.06 |
| HLA-B*57:01 | ALLSTPMKW | 0.698228 | 0.11 |
| HLA-B*57:01 | KAGVTPETF | 0.684575 | 0.12 |
| HLA-B*57:01 | ETFPTVSQF | 0.664528 | 0.14 |
| HLA-B*57:01 | GIVKKGLEW | 0.6479 | 0.15 |
| HLA-B*57:01 | DTAFSSYYW | 0.567722 | 0.21 |
| HLA-B*57:01 | LSNKVLAEY | 0.543075 | 0.23 |
| HLA-B*57:01 | QSAQIDTAF | 0.493442 | 0.28 |
| HLA-B*57:01 | SALVEATKF | 0.476072 | 0.29 |
| HLA-B*57:01 | YIMAFNPPW | 0.393343 | 0.37 |
| HLA-B*57:01 | KGNGLVDTF | 0.37135 | 0.4 |
| HLA-B*57:01 | KSWDESYTEL | 0.360359 | 0.42 |
| HLA-B*57:01 | TGIVKKGLEW | 0.308434 | 0.5 |
| HLA-B*57:01 | KALLSTPMKW | 0.912069 | 0.02 |
| HLA-B*57:01 | IDTAFSSYYW | 0.483515 | 0.28 |
| HLA-B*57:01 | KKTVEALNGY | 0.407539 | 0.36 |
| HLA-B*57:01 | TGYQQAALKW | 0.388491 | 0.38 |
| HLA-B*57:01 | STGIVKKGLEW | 0.490844 | 0.28 |
|  |  |  |  |
| HLA-B*58:01 | ESVPNLDRF | 0.422305 | 0.43 |
| HLA-B*58:01 | KTVEALNGY | 0.848598 | 0.06 |
| HLA-B*58:01 | KAGVTPETF | 0.837066 | 0.07 |
| HLA-B*58:01 | ALLSTPMKW | 0.828102 | 0.08 |
| HLA-B*58:01 | KNAGTIKSW | 0.810218 | 0.09 |
| HLA-B*58:01 | LSNKVLAEY | 0.717778 | 0.15 |
| HLA-B*58:01 | ETFPTVSQF | 0.705206 | 0.16 |
| HLA-B*58:01 | DTAFSSYYW | 0.700418 | 0.16 |
| HLA-B*58:01 | QSAQIDTAF | 0.69214 | 0.16 |
| HLA-B*58:01 | GIVKKGLEW | 0.673267 | 0.17 |
| HLA-B*58:01 | SALVEATKF | 0.6486 | 0.19 |
| HLA-B*58:01 | YIMAFNPPW | 0.59352 | 0.23 |
| HLA-B*58:01 | KGNGLVDTF | 0.582222 | 0.25 |
| HLA-B*58:01 | KQSPFQNAY | 0.389652 | 0.5 |
| HLA-B*58:01 | IDTAFSSYYW | 0.615357 | 0.22 |
| HLA-B*58:01 | KALLSTPMKW | 0.941314 | 0.01 |
| HLA-B*58:01 | KSWDESYTEL | 0.508142 | 0.34 |
| HLA-B*58:01 | TGYQQAALKW | 0.480327 | 0.37 |
| HLA-B*58:01 | ASALVEATKF | 0.410109 | 0.45 |
| HLA-B*58:01 | KKTVEALNGY | 0.406408 | 0.47 |
| HLA-B*58:01 | STGIVKKGLEW | 0.476171 | 0.37 |
| HLA-B*58:01 | RAQSAQIDTAF | 0.412114 | 0.45 |
|  |  |  |  |
| HLA-B*58:02 | ESVPNLDRF | 0.080094 | 0.44 |
| HLA-B*58:02 | YIMAFNPPW | 0.103609 | 0.34 |
| HLA-B*58:02 | DTFTNSYSF | 0.087876 | 0.41 |
| HLA-B*58:02 | KTVEALNGY | 0.311873 | 0.06 |
| HLA-B*58:02 | KAGVTPETF | 0.305257 | 0.07 |
| HLA-B*58:02 | ALLSTPMKW | 0.27744 | 0.08 |
| HLA-B*58:02 | KNAGTIKSW | 0.260243 | 0.1 |
| HLA-B*58:02 | ETFPTVSQF | 0.231871 | 0.11 |
| HLA-B*58:02 | LSNKVLAEY | 0.174753 | 0.18 |
| HLA-B*58:02 | QSAQIDTAF | 0.164275 | 0.19 |
| HLA-B*58:02 | KGNGLVDTF | 0.14393 | 0.23 |
| HLA-B*58:02 | GIVKKGLEW | 0.14388 | 0.23 |
| HLA-B*58:02 | SALVEATKF | 0.141864 | 0.23 |
| HLA-B*58:02 | KQSPFQNAY | 0.133968 | 0.25 |
| HLA-B*58:02 | KSWDESYTEL | 0.120851 | 0.28 |
| HLA-B*58:02 | IDTAFSSYYW | 0.115599 | 0.3 |
| HLA-B*58:02 | TGYQQAALKW | 0.087198 | 0.41 |
| HLA-B*58:02 | KKTVEALNGY | 0.073701 | 0.48 |
| HLA-B*58:02 | KALLSTPMKW | 0.501683 | 0.02 |
|  |  |  |  |
| HLA-C*01:02 | RIYMHPAVL | 0.303314 | 0.17 |
| HLA-C*01:02 | RVNANTAAL | 0.278227 | 0.2 |
| HLA-C*01:02 | SADSMITNL | 0.373972 | 0.13 |
| HLA-C*01:02 | VTPETFPTV | 0.7889 | 0.02 |
| HLA-C*01:02 | SWDESYTEL | 0.339613 | 0.14 |
| HLA-C*01:02 | ELYKNSSAL | 0.171248 | 0.37 |
| HLA-C*01:02 | LVATGLAKL | 0.08252 | 0.76 |
| HLA-C*01:02 | LTAGRISEM | 0.122202 | 0.54 |
| HLA-C*01:02 | YMHPAVLTA | 0.057833 | 1,1 |
| HLA-C*01:02 | YLDKHKDEV | 0.126111 | 0.52 |
| HLA-C*01:02 | IVMSVKEML | 0.05245 | 1,2 |
|  |  |  |  |
| HLA-C*02:02 | RVNANTAAL | 0.084331 | 0.74 |
| HLA-C*02:02 | KTVEALNGY | 0.330517 | 0.17 |
| HLA-C*02:02 | LTAGRISEM | 0.574525 | 0.07 |
| HLA-C*02:02 | RIYMHPAVL | 0.162072 | 0.44 |
| HLA-C*02:02 | YMHPAVLTA | 0.10382 | 0.63 |
| HLA-C*02:02 | LVDTFTNSY | 0.253311 | 0.24 |
| HLA-C*02:02 | ETFPTVSQF | 0.596043 | 0.06 |
| HLA-C*02:02 | LSNKVLAEY | 0.592847 | 0.06 |
| HLA-C*02:02 | KQSPFQNAY | 0.512795 | 0.08 |
| HLA-C*02:02 | LVATGLAKL | 0.113352 | 0.6 |
| HLA-C*02:02 | SADSMITNL | 0.232305 | 0.27 |
| HLA-C*02:02 | QSAQIDTAF | 0.153079 | 0.46 |
| HLA-C*02:02 | RISEMGVCF | 0.106852 | 0.62 |
| HLA-C*02:02 | HIAKAQELY | 0.131447 | 0.52 |
| HLA-C*02:02 | VTPETFPTV | 0.127743 | 0.52 |
|  | | | |
| HLA-C*02:09 | RVNANTAAL | 0.084331 | 0.74 |
| HLA-C*02:09 | KTVEALNGY | 0.330517 | 0.17 |
| HLA-C*02:09 | LTAGRISEM | 0.574525 | 0.07 |
| HLA-C*02:09 | RIYMHPAVL | 0.162072 | 0.44 |
| HLA-C*02:09 | YMHPAVLTA | 0.10382 | 0.63 |
| HLA-C*02:09 | LVDTFTNSY | 0.253311 | 0.24 |
| HLA-C*02:09 | ETFPTVSQF | 0.596043 | 0.06 |
| HLA-C*02:09 | LSNKVLAEY | 0.592847 | 0.06 |
| HLA-C*02:09 | KQSPFQNAY | 0.512795 | 0.08 |
| HLA-C*02:09 | LVATGLAKL | 0.113352 | 0.6 |
| HLA-C*02:09 | SADSMITNL | 0.232305 | 0.27 |
| HLA-C*02:09 | QSAQIDTAF | 0.153079 | 0.46 |
| HLA-C*02:09 | RISEMGVCF | 0.106852 | 0.62 |
| HLA-C*02:09 | HIAKAQELY | 0.131447 | 0.52 |
| HLA-C*02:09 | VTPETFPTV | 0.127743 | 0.52 |
|  |  |  |  |
| HLA-C*03:02 | RVNANTAAL | 0.295069 | 0.45 |
| HLA-C*03:02 | RIYMHPAVL | 0.359952 | 0.35 |
| HLA-C*03:02 | ETFPTVSQF | 0.638901 | 0.11 |
| HLA-C*03:02 | QSAQIDTAF | 0.41976 | 0.27 |
| HLA-C*03:02 | LTAGRISEM | 0.65171 | 0.1 |
| HLA-C*03:02 | YMHPAVLTA | 0.192294 | 0.7 |
| HLA-C*03:02 | LSNKVLAEY | 0.701601 | 0.08 |
| HLA-C*03:02 | LVDTFTNSY | 0.653167 | 0.1 |
| HLA-C*03:02 | YKVPGEIVM | 0.230368 | 0.58 |
| HLA-C*03:02 | KQSPFQNAY | 0.624259 | 0.12 |
| HLA-C*03:02 | KTVEALNGY | 0.405564 | 0.28 |
| HLA-C*03:02 | SADSMITNL | 0.314099 | 0.42 |
| HLA-C*03:02 | SALVEATKF | 0.600363 | 0.14 |
| HLA-C*03:02 | LVATGLAKL | 0.138755 | 0.95 |
| HLA-C*03:02 | RISEMGVCF | 0.251313 | 0.54 |
| HLA-C*03:02 | YIMAFNPPW | 0.090208 | 1,4 |
| HLA-C*03:02 | IVMSVKEML | 0.119402 | 1,1 |
|  |  |  |  |
| HLA-C*03:03 | RVNANTAAL | 0.344089 | 0.2 |
| HLA-C*03:03 | RIYMHPAVL | 0.409238 | 0.16 |
| HLA-C*03:03 | SADSMITNL | 0.617927 | 0.07 |
| HLA-C*03:03 | LVATGLAKL | 0.16394 | 0.42 |
| HLA-C*03:03 | TAALSNKVL | 0.753266 | 0.04 |
| HLA-C*03:03 | LTAGRISEM | 0.464482 | 0.12 |
| HLA-C*03:03 | ELYKNSSAL | 0.153883 | 0.44 |
| HLA-C*03:03 | YMHPAVLTA | 0.068273 | 0.83 |
| HLA-C*03:03 | IVMSVKEML | 0.163322 | 0.42 |
| HLA-C*03:03 | ETFPTVSQF | 0.155636 | 0.44 |
| HLA-C*03:03 | YKVPGEIVM | 0.136982 | 0.49 |
| HLA-C*03:03 | TAFSSYYWL | 0.189497 | 0.36 |
| HLA-C*03:03 | QSAQIDTAF | 0.111817 | 0.59 |
| HLA-C*03:03 | VTPETFPTV | 0.12378 | 0.53 |
|  |  |  |  |
| HLA-C*03:04 | RVNANTAAL | 0.344089 | 0.2 |
| HLA-C*03:04 | RIYMHPAVL | 0.409238 | 0.16 |
| HLA-C*03:04 | SADSMITNL | 0.617927 | 0.07 |
| HLA-C*03:04 | LVATGLAKL | 0.16394 | 0.42 |
| HLA-C*03:04 | TAALSNKVL | 0.753266 | 0.04 |
| HLA-C*03:04 | LTAGRISEM | 0.464482 | 0.12 |
| HLA-C*03:04 | ELYKNSSAL | 0.153883 | 0.44 |
| HLA-C*03:04 | YMHPAVLTA | 0.068273 | 0.83 |
| HLA-C*03:04 | IVMSVKEML | 0.163322 | 0.42 |
| HLA-C*03:04 | ETFPTVSQF | 0.155636 | 0.44 |
| HLA-C*03:04 | YKVPGEIVM | 0.136982 | 0.49 |
| HLA-C*03:04 | TAFSSYYWL | 0.189497 | 0.36 |
| HLA-C*03:04 | QSAQIDTAF | 0.111817 | 0.59 |
| HLA-C*03:04 | VTPETFPTV | 0.12378 | 0.53 |
|  |  |  |  |
| HLA-C*04:01 | SWDESYTEL | 0.985106 | 0.01 |
| HLA-C*04:01 | IFDEAKKTV | 0.881367 | 0.02 |
| HLA-C*04:01 | YLDKHKDEV | 0.47002 | 0.07 |
| HLA-C*04:01 | TFPTVSQFL | 0.343864 | 0.11 |
| HLA-C*04:01 | SFQQNRIYM | 0.111717 | 0.41 |
| HLA-C*04:01 | LFEVQKTGF | 0.200133 | 0.23 |
| HLA-C*04:01 | WFEKNAGTI | 0.059495 | 0.69 |
| HLA-C*04:01 | SADSMITNL | 0.4651 | 0.08 |
| HLA-C*04:01 | NLDRFVFQM | 0.190982 | 0.24 |
| HLA-C*04:01 | AFNPPWGDI | 0.017669 | 1,7 |
| HLA-C*04:01 | KSWDESYTEL | 0.469634 | 0.07 |
| HLA-C*04:01 | SWDESYTELK | 0.205432 | 0.22 |
| HLA-C*04:01 | IKSWDESYTEL | 0.392693 | 0.1 |
|  |  |  |  |
| HLA-C*05:01 | YLDKHKDEV | 0.936415 | 0.04 |
| HLA-C*05:01 | SADSMITNL | 0.969829 | 0.02 |
| HLA-C*05:01 | NLDRFVFQM | 0.487646 | 0.23 |
| HLA-C*05:01 | IFDEAKKTV | 0.3478 | 0.31 |
| HLA-C*05:01 | LVDTFTNSY | 0.407043 | 0.28 |
| HLA-C*05:01 | RVNANTAAL | 0.080548 | 0.92 |
| HLA-C*05:01 | SWDESYTEL | 0.569742 | 0.17 |
| HLA-C*05:01 | VTPETFPTV | 0.212265 | 0.47 |
| HLA-C*05:01 | KVDVPKIEQL | 0.519538 | 0.21 |
| HLA-C*05:01 | KSWDESYTEL | 0.671896 | 0.14 |
| HLA-C*05:01 | SADSMITNLL | 0.68731 | 0.13 |
|  |  |  |  |
| HLA-C*06:02 | WRKDIGFRV | 0.536749 | 0.04 |
| HLA-C*06:02 | NRIYMHPAV | 0.193432 | 0.28 |
| HLA-C*06:02 | RIYMHPAVL | 0.068421 | 0.76 |
| HLA-C*06:02 | KHIAKAQEL | 0.193099 | 0.28 |
| HLA-C*06:02 | ETFPTVSQF | 0.18699 | 0.3 |
| HLA-C*06:02 | YKVPGEIVM | 0.162499 | 0.34 |
| HLA-C*06:02 | TFPTVSQFL | 0.144465 | 0.38 |
| HLA-C*06:02 | SFQQNRIYM | 0.048424 | 1,1 |
| HLA-C*06:02 | YMHPAVLTA | 0.076117 | 0.71 |
| HLA-C*06:02 | FRVNANTAAL | 0.009815 | 2,9 |
| HLA-C*06:02 | NRIYMHPAVL | 0.072897 | 0.73 |
|  |  |  |  |
| HLA-C*07:01 | WRKDIGFRV | 0.117822 | 0.16 |
| HLA-C*07:01 | NRIYMHPAV | 0.025969 | 0.77 |
| HLA-C*07:01 | RIYMHPAVL | 0.033783 | 0.62 |
| HLA-C*07:01 | YKVPGEIVM | 0.049556 | 0.45 |
| HLA-C*07:01 | KHIAKAQEL | 0.126428 | 0.15 |
| HLA-C*07:01 | ETFPTVSQF | 0.096438 | 0.22 |
| HLA-C*07:01 | SFQQNRIYM | 0.037442 | 0.56 |
| HLA-C*07:01 | FRVNANTAAL | 0.01775 | 1,1 |
| HLA-C*07:01 | NRIYMHPAVL | 0.285657 | 0.22 |
|  |  |  |  |
| HLA-C*07:02 | SFQQNRIYM | 0.184632 | 0.18 |
| HLA-C*07:02 | RIYMHPAVL | 0.051205 | 0.7 |
| HLA-C*07:02 | SWDESYTEL | 0.38543 | 0.06 |
| HLA-C*07:02 | WRKDIGFRV | 0.056625 | 0.63 |
| HLA-C*07:02 | KHIAKAQEL | 0.220904 | 0.14 |
| HLA-C*07:02 | TFPTVSQFL | 0.210181 | 0.15 |
| HLA-C*07:02 | RVNANTAAL | 0.006187 | 2,7 |
| HLA-C*07:02 | YKVPGEIVM | 0.203113 | 0.16 |
| HLA-C*07:02 | NRIYMHPAV | 0.331522 | 0.18 |
| HLA-C*07:02 | FRVNANTAAL | 0.042519 | 0.81 |
|  |  |  |  |
| HLA-C*07:04 | SWDESYTEL | 0.292426 | 0.02 |
| HLA-C*07:04 | SFQQNRIYM | 0.053104 | 0.41 |
| HLA-C*07:04 | IFDEAKKTV | 0.269055 | 0.03 |
| HLA-C*07:04 | TFPTVSQFL | 0.094353 | 0.2 |
| HLA-C*07:04 | RIYMHPAVL | 0.043099 | 0.52 |
| HLA-C*07:04 | RVNANTAAL | 0.01555 | 1,4 |
| HLA-C*07:04 | KHIAKAQEL | 0.193258 | 0.06 |
| HLA-C*07:04 | SADSMITNL | 0.132583 | 0.12 |
| HLA-C*07:04 | WRKDIGFRV | 0.030178 | 0.74 |
| HLA-C*07:04 | IYMHPAVL | 0.043455 | 0.51 |
| HLA-C*07:04 | YLDKHKDEV | 0.184856 | 0.07 |
| HLA-C*07:04 | YMHPAVLTA | 0.066028 | 0.32 |
| HLA-C*07:04 | WFEKNAGTI | 0.004299 | 3,4 |
| HLA-C*07:04 | YYWLYKAGV | 0.006095 | 2,7 |
| HLA-C*07:04 | SFCESVPNL | 0.040722 | 0.53 |
| HLA-C*07:04 | FRVNANTAAL | 0.013525 | 1,5 |
|  |  |  |  |
| HLA-C*08:01 | SADSMITNL | 0.804813 | 0.01 |
| HLA-C*08:01 | RVNANTAAL | 0.076462 | 0.44 |
| HLA-C*08:01 | RIYMHPAVL | 0.070643 | 0.47 |
| HLA-C*08:01 | YLDKHKDEV | 0.244297 | 0.15 |
| HLA-C*08:01 | YMHPAVLTA | 0.055305 | 0.57 |
| HLA-C*08:01 | VTPETFPTV | 0.150586 | 0.25 |
| HLA-C*08:01 | IVMSVKEML | 0.02501 | 1 |
| HLA-C*08:01 | NLDRFVFQM | 0.074625 | 0.44 |
| HLA-C*08:01 | SWDESYTEL | 0.218178 | 0.16 |
| HLA-C*08:01 | TVSQFLFEL | 0.080771 | 0.42 |
| HLA-C*08:01 | YKVPGEIVM | 0.051053 | 0.61 |
|  |  |  |  |
| HLA-C*08:02 | SADSMITNL | 0.977696 | 0.01 |
| HLA-C*08:02 | YLDKHKDEV | 0.831114 | 0.07 |
| HLA-C*08:02 | RVNANTAAL | 0.108121 | 0.69 |
| HLA-C*08:02 | RIYMHPAVL | 0.036847 | 1,3 |
| HLA-C*08:02 | SWDESYTEL | 0.617637 | 0.14 |
| HLA-C*08:02 | NLDRFVFQM | 0.302266 | 0.32 |
| HLA-C*08:02 | LVDTFTNSY | 0.314319 | 0.31 |
| HLA-C*08:02 | IFDEAKKTV | 0.350618 | 0.28 |
| HLA-C*08:02 | YMHPAVLTA | 0.019115 | 2 |
| HLA-C*08:02 | VTPETFPTV | 0.104076 | 0.7 |
| HLA-C*08:02 | SADSMITNLL | 0.64571 | 0.13 |
|  |  |  |  |
| HLA-C*12:02 | RVNANTAAL | 0.135487 | 0.48 |
| HLA-C*12:02 | RIYMHPAVL | 0.213749 | 0.32 |
| HLA-C*12:02 | YMHPAVLTA | 0.187153 | 0.36 |
| HLA-C*12:02 | ETFPTVSQF | 0.55293 | 0.06 |
| HLA-C*12:02 | LTAGRISEM | 0.482225 | 0.09 |
| HLA-C*12:02 | KTVEALNGY | 0.231956 | 0.27 |
| HLA-C*12:02 | KQSPFQNAY | 0.52096 | 0.07 |
| HLA-C*12:02 | YKVPGEIVM | 0.269833 | 0.21 |
| HLA-C*12:02 | LSNKVLAEY | 0.465.18 | 0.1 |
| HLA-C*12:02 | LVDTFTNSY | 0.314608 | 0.18 |
| HLA-C*12:02 | QSAQIDTAF | 0.142111 | 0.46 |
| HLA-C*12:02 | LVATGLAKL | 0.077703 | 0.82 |
| HLA-C*12:02 | SADSMITNL | 0.227361 | 0.28 |
| HLA-C*12:02 | ELYKNSSAL | 0.074394 | 0.85 |
| HLA-C*12:02 | RISEMGVCF | 0.072178 | 0.87 |
|  |  |  |  |
| HLA-C*12:03 | RVNANTAAL | 0.057429 | 0.81 |
| HLA-C*12:03 | RIYMHPAVL | 0.183156 | 0.32 |
| HLA-C*12:03 | LTAGRISEM | 0.586705 | 0.04 |
| HLA-C*12:03 | ETFPTVSQF | 0.436026 | 0.09 |
| HLA-C*12:03 | YMHPAVLTA | 0.161911 | 0.36 |
| HLA-C*12:03 | SADSMITNL | 0.137897 | 0.41 |
| HLA-C*12:03 | LVATGLAKL | 0.030888 | 1,4 |
| HLA-C*12:03 | KTVEALNGY | 0.109866 | 0.52 |
| HLA-C*12:03 | IVMSVKEML | 0.038686 | 1,2 |
| HLA-C*12:03 | LSNKVLAEY | 0.299341 | 0.17 |
| HLA-C*12:03 | LVDTFTNSY | 0.066203 | 0.73 |
| HLA-C*12:03 | VTPETFPTV | 0.229054 | 0.25 |
| HLA-C*12:03 | QSAQIDTAF | 0.046067 | 0.99 |
| HLA-C*12:03 | YKVPGEIVM | 0.109873 | 0.52 |
| HLA-C*12:03 | KQSPFQNAY | 0.194657 | 0.3 |
|  |  |  |  |
| HLA-C*14:02 | SFQQNRIYM | 0.888976 | 0.03 |
| HLA-C*14:02 | SWDESYTEL | 0.683506 | 0.1 |
| HLA-C*14:02 | RIYMHPAVL | 0.13154 | 0.65 |
| HLA-C*14:02 | RVNANTAAL | 0.083204 | 0.92 |
| HLA-C*14:02 | TFPTVSQFL | 0.848016 | 0.04 |
| HLA-C*14:02 | IYMHPAVL | 0.850381 | 0.04 |
| HLA-C*14:02 | IFDEAKKTV | 0.39511 | 0.25 |
| HLA-C*14:02 | SFCESVPNL | 0.477453 | 0.2 |
| HLA-C*14:02 | KHIAKAQEL | 0.160159 | 0.55 |
| HLA-C*14:02 | LFEVQKTGF | 0.279379 | 0.35 |
| HLA-C*14:02 | YMHPAVLTA | 0.048797 | 1,4 |
| HLA-C*14:02 | LVDTFTNSY | 0.093799 | 0.84 |
| HLA-C*14:02 | KQSPFQNAY | 0.113871 | 0.72 |
|  |  |  |  |
| HLA-C*15:02 | RVNANTAAL | 0.10376 | 1,6 |
| HLA-C*15:02 | RIYMHPAVL | 0.502089 | 0.14 |
| HLA-C*15:02 | KTIVKLFEV | 0.804631 | 0.02 |
| HLA-C*15:02 | SADSMITNL | 0.478278 | 0.16 |
| HLA-C*15:02 | LTAGRISEM | 0.585874 | 0.09 |
| HLA-C*15:02 | VTPETFPTV | 0.467707 | 0.16 |
| HLA-C*15:02 | LVATGLAKL | 0.134285 | 0.73 |
| HLA-C*15:02 | IVMSVKEML | 0.191032 | 0.52 |
| HLA-C*15:02 | YMHPAVLTA | 0.09988 | 0.93 |
| HLA-C*15:02 | YLDKHKDEV | 0.058935 | 1,4 |
| HLA-C*15:02 | KVDVPKIEQL | 0.134781 | 0.73 |
|  |  |  |  |
| HLA-C*16:01 | RVNANTAAL | 0.144389 | 0.65 |
| HLA-C*16:01 | RIYMHPAVL | 0.248505 | 0.38 |
| HLA-C*16:01 | LTAGRISEM | 0.721824 | 0.04 |
| HLA-C*16:01 | SADSMITNL | 0.224132 | 0.43 |
| HLA-C*16:01 | IVMSVKEML | 0.084388 | 1,1 |
| HLA-C*16:01 | YMHPAVLTA | 0.070683 | 1,12 |
| HLA-C*16:01 | LVATGLAKL | 0.037975 | 1,8 |
| HLA-C*16:01 | ETFPTVSQF | 0.245786 | 0.38 |
| HLA-C*16:01 | KSGRSGIAL | 0.092765 | 0.95 |
| HLA-C*16:01 | RISEMGVCF | 0.055127 | 1,4 |
| HLA-C*16:01 | TAALSNKVL | 0.657969 | 0.07 |
| HLA-C*16:01 | KGNGLVDTF | 0.03475 | 1,9 |
| HLA-C*16:01 | KAGVTPETF | 0.242351 | 0.39 |
| HLA-C*16:01 | SALVEATKF | 0.388382 | 0.22 |
| HLA-C*16:01 | QSAQIDTAF | 0.168323 | 0.56 |
| HLA-C*16:01 | TVSQFLFEL | 0.117503 | 0.78 |
|  |  |  |  |
| HLA-C*17:01 | SADSMITNL | 0.870763 | 0.02 |
| HLA-C*17:01 | YLDKHKDEV | 0.405748 | 0.26 |
| HLA-C*17:01 | RVNANTAAL | 0.387789 | 0.28 |
| HLA-C*17:01 | RIYMHPAVL | 0.594509 | 0.11 |
| HLA-C*17:01 | VTPETFPTV | 0.474787 | 0.19 |
| HLA-C*17:01 | YMHPAVLTA | 0.209866 | 0.64 |
| HLA-C*17:01 | NLDRFVFQM | 0.312571 | 0.41 |
| HLA-C*17:01 | LVATGLAKL | 0.42735 | 0.23 |
| HLA-C*17:01 | TVSQFLFEL | 0.58443 | 0.12 |
| HLA-C*17:01 | IVMSVKEML | 0.358419 | 0.33 |
| HLA-C*17:01 | LTAGRISEM | 0.425724 | 0.23 |
| HLA-C*17:01 | KTIVKLFEV | 0.284723 | 0.45 |
| HLA-C*17:01 | SWDESYTEL | 0.276751 | 0.47 |
|  |  |  |  |
| HLA-E*01:01 | RIYMHPAVL | 0.298321 | 0.02 |
| HLA-E*01:01 | VTPETFPTV | 0.238479 | 0.03 |
| HLA-E*01:01 | RVNANTAAL | 0.211718 | 0.05 |
| HLA-E*01:01 | SADSMITNL | 0.153482 | 0.1 |
| HLA-E*01:01 | SWDESYTEL | 0.121994 | 0.15 |
| HLA-E*01:01 | TFPTVSQFL | 0.094267 | 0.23 |
| HLA-E*01:01 | IVMSVKEML | 0.06817 | 0.36 |
| HLA-E*01:01 | YLDKHKDEV | 0.066049 | 0.38 |
| HLA-E*01:01 | MIRRRNLIL | 0.063059 | 0.39 |
| HLA-E*01:01 | KVDVPKIEQL | 0.060781 | 0.41 |
|  |  |  |  |
| HLA-G*01:01 | TFPTVSQFL | 0.686275 | 0.01 |
| HLA-G*01:01 | SWDESYTEL | 0.617221 | 0.03 |
| HLA-G*01:01 | VTPETFPTV | 0.496746 | 0.11 |
| HLA-G*01:01 | KWGKKLYEL | 0.496243 | 0.11 |
| HLA-G*01:01 | RVNANTAAL | 0.445052 | 0.17 |
| HLA-G*01:01 | SFQQNRIYM | 0.430164 | 0.18 |
| HLA-G*01:01 | RIYMHPAVL | 0.354299 | 0.34 |
| HLA-G*01:01 | SADSMITNL | 0.347672 | 0.36 |
| HLA-G*01:01 | ETFPTVSQF | 0.339252 | 0.38 |
| HLA-G*01:01 | KGNGLVDTF | 0.331135 | 0.41 |
| HLA-G*01:01 | SFCESVPNL | 0.330922 | 0.41 |
| HLA-G*01:01 | IVMSVKEML | 0.329213 | 0.42 |
| HLA-G*01:01 | IFDEAKKTV | 0.324607 | 0.43 |
| HLA-G*01:01 | QSAQIDTAF | 0.304129 | 0.5 |
| HLA-G*01:01 | RISEMGVCF | 0.319818 | 0.45 |
| HLA-G*01:01 | TFPTVSQFLF | 0.503224 | 0.1 |
| HLA-G*01:01 | KSWDESYTEL | 0.364337 | 0.32 |
| HLA-G*01:01 | SVPNLDRFVF | 0.324432 | 0.43 |
|  |  |  |  |
| HLA-G*01:02 | TFPTVSQFL | 0.686275 | 0.01 |
| HLA-G*01:02 | SWDESYTEL | 0.617221 | 0.03 |
| HLA-G*01:02 | VTPETFPTV | 0.496746 | 0.11 |
| HLA-G*01:02 | KWGKKLYEL | 0.496243 | 0.11 |
| HLA-G*01:02 | RVNANTAAL | 0.445052 | 0.17 |
| HLA-G*01:02 | SFQQNRIYM | 0.430164 | 0.18 |
| HLA-G*01:02 | RIYMHPAVL | 0.354299 | 0.34 |
| HLA-G*01:02 | SADSMITNL | 0.347672 | 0.36 |
| HLA-G*01:02 | ETFPTVSQF | 0.339252 | 0.38 |
| HLA-G*01:02 | KGNGLVDTF | 0.331135 | 0.41 |
| HLA-G*01:02 | SFCESVPNL | 0.330922 | 0.41 |
| HLA-G*01:02 | IVMSVKEML | 0.329213 | 0.42 |
| HLA-G*01:02 | IFDEAKKTV | 0.324607 | 0.43 |
| HLA-G*01:02 | RISEMGVCF | 0.319818 | 0.45 |
| HLA-G*01:02 | QSAQIDTAF | 0.304129 | 0.5 |
| HLA-G*01:02 | TFPTVSQFLF | 0.503224 | 0.1 |
| HLA-G*01:02 | KSWDESYTEL | 0.364337 | 0.32 |
| HLA-G*01:02 | SVPNLDRFVF | 0.324432 | 0.43 |
|  |  |  |  |
| HLA-G*01:03 | TFPTVSQFL | 0.686275 | 0.01 |
| HLA-G*01:03 | SWDESYTEL | 0.617221 | 0.03 |
| HLA-G*01:03 | VTPETFPTV | 0.496746 | 0.11 |
| HLA-G*01:03 | KWGKKLYEL | 0.496243 | 0.11 |
| HLA-G*01:03 | RVNANTAAL | 0.445052 | 0.17 |
| HLA-G*01:03 | SFQQNRIYM | 0.430164 | 0.18 |
| HLA-G*01:03 | RIYMHPAVL | 0.354299 | 0.34 |
| HLA-G*01:03 | SADSMITNL | 0.347672 | 0.36 |
| HLA-G*01:03 | ETFPTVSQF | 0.339252 | 0.38 |
| HLA-G*01:03 | KGNGLVDTF | 0.331135 | 0.41 |
| HLA-G*01:03 | SFCESVPNL | 0.330922 | 0.41 |
| HLA-G*01:03 | IVMSVKEML | 0.329213 | 0.42 |
| HLA-G*01:03 | IFDEAKKTV | 0.324607 | 0.43 |
| HLA-G*01:03 | RISEMGVCF | 0.319818 | 0.45 |
| HLA-G*01:03 | TFPTVSQF | 0.313963 | 0.46 |
| HLA-G*01:03 | QSAQIDTAF | 0.304129 | 0.5 |
| HLA-G*01:03 | TFPTVSQFLF | 0.503224 | 0.1 |
| HLA-G*01:03 | KSWDESYTEL | 0.364337 | 0.32 |
| HLA-G*01:03 | SVPNLDRFVF | 0.324432 | 0.43 |
|  |  |  |  |
| HLA-G*01:04 | TFPTVSQFL | 0.686275 | 0.01 |
| HLA-G*01:04 | SWDESYTEL | 0.617221 | 0.03 |
| HLA-G*01:04 | VTPETFPTV | 0.496746 | 0.11 |
| HLA-G*01:04 | KWGKKLYEL | 0.496243 | 0.11 |
| HLA-G*01:04 | RVNANTAAL | 0.445052 | 0.17 |
| HLA-G*01:04 | SFQQNRIYM | 0.430164 | 0.18 |
| HLA-G*01:04 | RIYMHPAVL | 0.354299 | 0.34 |
| HLA-G*01:04 | SADSMITNL | 0.347672 | 0.36 |
| HLA-G*01:04 | ETFPTVSQF | 0.339252 | 0.38 |
| HLA-G*01:04 | KGNGLVDTF | 0.331135 | 0.41 |
| HLA-G*01:04 | SFCESVPNL | 0.330922 | 0.41 |
| HLA-G*01:04 | IVMSVKEML | 0.329213 | 0.42 |
| HLA-G*01:04 | IFDEAKKTV | 0.324607 | 0.43 |
| HLA-G*01:04 | RISEMGVCF | 0.319818 | 0.45 |
| HLA-G*01:04 | QSAQIDTAF | 0.304129 | 0.5 |
| HLA-G*01:04 | TFPTVSQFLF | 0.503224 | 0.1 |
| HLA-G*01:04 | KSWDESYTEL | 0.364337 | 0.32 |
| HLA-G*01:04 | SVPNLDRFVF | 0.324432 | 0.43 |
|  |  |  |  |
| HLA-G*01:06 | TFPTVSQFL | 0.686275 | 0.01 |
| HLA-G*01:06 | SWDESYTEL | 0.617221 | 0.03 |
| HLA-G*01:06 | VTPETFPTV | 0.496746 | 0.11 |
| HLA-G*01:06 | KWGKKLYEL | 0.496243 | 0.11 |
| HLA-G*01:06 | RVNANTAAL | 0.445052 | 0.17 |
| HLA-G*01:06 | SFQQNRIYM | 0.430164 | 0.18 |
| HLA-G*01:06 | RIYMHPAVL | 0.354299 | 0.34 |
| HLA-G*01:06 | SADSMITNL | 0.347672 | 0.36 |
| HLA-G*01:06 | ETFPTVSQF | 0.339252 | 0.38 |
| HLA-G*01:06 | KGNGLVDTF | 0.331135 | 0.41 |
| HLA-G*01:06 | SFCESVPNL | 0.330922 | 0.41 |
| HLA-G*01:06 | IVMSVKEML | 0.329213 | 0.42 |
| HLA-G*01:06 | IFDEAKKTV | 0.324607 | 0.43 |
| HLA-G*01:06 | RISEMGVCF | 0.319818 | 0.45 |
| HLA-G*01:06 | QSAQIDTAF | 0.304129 | 0.5 |
| HLA-G*01:06 | TFPTVSQFLF | 0.503224 | 0.1 |
| HLA-G*01:06 | KSWDESYTEL | 0.364337 | 0.32 |
| HLA-G*01:06 | SVPNLDRFVF | 0.324432 | 0.43 |

**Supplementary Table 3** Prediction of MHC-I epitopes with binding affinity to CCHFV-NP using the NetMHC 4.0 database (August 2020 data)

| **HLA tipi** | **Peptide** | **1-log50k(aff)** | **Affinity(nM)** | **%Rank** |
| --- | --- | --- | --- | --- |
| HLA-A0101 | LVDTFTNSY | 0.844 | 5,43 | 0.01 |
| HLA-A0101 | LSNKVLAEY | 0.550 | 130.88 | 0.17 |
| HLA-A0101 | QIDTAFSSY | 0.502 | 219.78 | 0.25 |
| HLA-A0101 | FSSYYWLYK | 0.446 | 399.72 | 0.40 |
| HLA-A0101 | QIDTAFSSYY | 0.707 | 23.85 | 0.04 |
| HLA-A0101 | GLVDTFTNSY | 0.686 | 29.76 | 0.05 |
| HLA-A0101 | FSSYYWLYKA | 0.539 | 146.71 | 0.20 |
| HLA-A0101 | LVDTFTNSYS | 0.536 | 152.06 | 0.20 |
| HLA-A0101 | TAFSSYYWLY | 0.458 | 353.32 | 0.30 |
| HLA-A0101 | AQIDTAFSSY | 0.388 | 750.71 | 0.50 |
| HLA-A0101 | AQIDTAFSSYY | 0.574 | 99.96 | 0.15 |
| HLA-A0101 | DTAFSSYYWLY | 0.565 | 111.02 | 0.15 |
| HLA-A0101 | NGLVDTFTNSY | 0.548 | 133.52 | 0.17 |
| HLA-A0101 | ATDDAQKDSIY | 0.521 | 178.57 | 0.20 |
| HLA-A0101 | QIDTAFSSYYW | 0.407 | 613.21 | 0.50 |
| HLA-A0101 | AFSSYYWLYKA | 0.391 | 723.93 | 0.50 |
|  |  |  |  |  |
| HLA-A0201 | YMHPAVLTA | 0.750 | 15.00 | 0.20 |
| HLA-A0201 | KTIVKLFEV | 0.688 | 29.19 | 0.40 |
|  |  |  |  |  |
| HLA-A0202 | TVSQFLFEL | 0.743 | 16.13 | 0.50 |
|  |  |  |  |  |
| HLA-A0203 | YMHPAVLTA | 0.867 | 4,21 | 0.06 |
| HLA-A0203 | ALVATGLAKL | 0.753 | 14.48 | 0.40 |
|  |  |  |  |  |
| HLA-A0205 | YLDKHKDEV | 0.442 | 417.30 | 0.09 |
| HLA-A0205 | YYWLYKAGV | 0.410 | 593.60 | 0.12 |
| HLA-A0205 | VTPETFPTV | 0.409 | 596.53 | 0.12 |
| HLA-A0205 | ALRAQSAQI | 0.339 | 1279.63 | 0.30 |
| HLA-A0205 | WFEKNAGTI | 0.282 | 2370.46 | 0.50 |
|  |  |  |  |  |
| HLA-A0206 | KTIVKLFEV | 0.838 | 5,78 | 0.07 |
| HLA-A0206 | VTPETFPTV | 0.827 | 6,53 | 0.08 |
| HLA-A0206 | TVSQFLFEL | 0.729 | 18.79 | 0.40 |
| HLA-A0206 | AQIDTAFSS | 0.726 | 19.39 | 0.40 |
| HLA-A0206 | GVTPETFPTV | 0.711 | 22.87 | 0.50 |
|  |  |  |  |  |
| HLA-A0207 | YLDKHKDEV | 0.197 | 5918.30 | 0.15 |
| HLA-A0207 | YYWLYKAGV | 0.184 | 6856.21 | 0.20 |
| HLA-A0207 | VTPETFPTV | 0.181 | 7084.55 | 0.20 |
| HLA-A0207 | HVDWCREFV | 0.141 | 10918.51 | 0.50 |
| HLA-A0207 | GVTPETFPTV | 0.191 | 6357.35 | 0.17 |
| HLA-A0207 | KVPGEIVMSV | 0.176 | 7413.28 | 0.25 |
| HLA-A0207 | AGVTPETFPTV | 0.143 | 10595.44 | 0.50 |
| HLA-A0207 | GVTPETFPTVS | 0.143 | 10685.35 | 0.50 |
|  |  |  |  |  |
| HLA-A0211 | YMHPAVLTA | 0.890 | 3,28 | 0.09 |
| HLA-A0211 | YLDKHKDEV | 0.851 | 5,01 | 0.20 |
| HLA-A0211 | NLDRFVFQM | 0.750 | 14.93 | 0.50 |
| HLA-A0211 | VTPETFPTV | 0.742 | 16.37 | 0.50 |
|  |  |  |  |  |
| HLA-A0212 | YMHPAVLTA | 0.795 | Eyl.15 | 0.12 |
| HLA-A0212 | YLDKHKDEV | 0.718 | 21.15 | 0.25 |
| HLA-A0212 | KTIVKLFEV | 0.613 | 65.74 | 0.50 |
|  |  |  |  |  |
| HLA-A0216 | YLDKHKDEV | 0.828 | 6,4 | 0.07 |
| HLA-A0216 | YMHPAVLTA | 0.764 | 12,88 | 0.15 |
| HLA-A0216 | NLDRFVFQM | 0.633 | 53.00 | 0.50 |
| HLA-A0216 | NLLKHIAKA | 0.628 | 56.25 | 0.50 |
|  |  |  |  |  |
| HLA-A0217 | YIMAFNPPW | 0.609 | 68.47 | 0.10 |
| HLA-A0217 | TVSQFLFEL | 0.509 | 203.57 | 0.40 |
|  |  |  |  |  |
| HLA-A0219 | NLDRFVFQM | 0.620 | 60.88 | 0.30 |
| HLA-A0219 | YLDKHKDEV | 0.605 | 71.60 | 0.30 |
|  |  |  |  |  |
| HLA-A0250 | YMHPAVLTA | 0.823 | 6,8 | 0.10 |
| HLA-A0250 | YYWLYKAGV | 0.731 | 18.27 | 0.30 |
| HLA-A0250 | YLDKHKDEV | 0.720 | 20.58 | 0.30 |
| HLA-A0250 | WRKDIGFRV | 0.652 | 43.27 | 0.50 |
|  |  |  |  |  |
| HLA-A0301 | ALVATGLAK | 0.658 | 40.52 | 0.20 |
| HLA-A0301 | FSSYYWLYK | 0.648 | 45.23 | 0.25 |
| HLA-A0301 | KALLSTPMK | 0.613 | 65.96 | 0.30 |
| HLA-A0301 | LLHQSLVGK | 0.596 | 79.43 | 0.40 |
| HLA-A0301 | HLLHQSLVGK | 0.740 | 16.71 | 0.06 |
| HLA-A0301 | HIAKAQELYK | 0.725 | 19.56 | 0.08 |
| HLA-A0301 | LLSTPMKWGK | 0.706 | 24.20 | 0.12 |
| HLA-A0301 | AFSSYYWLYK | 0.702 | 25.26 | 0.12 |
| HLA-A0301 | LTGYQQAALK | 0.658 | 40.68 | 0.20 |
| HLA-A0301 | IALVATGLAK | 0.639 | 49.60 | 0.25 |
| HLA-A0301 | ADSMITNLLK | 0.629 | 55.30 | 0.25 |
| HLA-A0301 | LSNKVLAEYK | 0.587 | 87.04 | 0.40 |
| HLA-A0301 | ALNGYLDKHK | 0.576 | 98.74 | 0.50 |
| HLA-A0301 | ALSNKVLAEY | 0.567 | 108.47 | 0.50 |
| HLA-A0301 | ALSNKVLAEYK | 0.594 | 80.51 | 0.40 |
|  |  |  |  |  |
| HLA-A1101 | FSSYYWLYK | 0.814 | 7,5 | 0.01 |
| HLA-A1101 | SQFLFELGK | 0.742 | 16.28 | 0.08 |
| HLA-A1101 | VSSTGIVKK | 0.705 | 24.27 | 0.15 |
| HLA-A1101 | KALLSTPMK | 0.655 | 41.72 | 0.30 |
| HLA-A1101 | ASALVEATK | 0.629 | 55.34 | 0.40 |
| HLA-A1101 | ALVATGLAK | 0.622 | 59.83 | 0.50 |
| HLA-A1101 | AFSSYYWLYK | 0.815 | 7,44 | 0.01 |
| HLA-A1101 | ADSMITNLLK | 0.751 | 14.73 | 0.06 |
| HLA-A1101 | VSQFLFELGK | 0.705 | 24.35 | 0.15 |
| HLA-A1101 | LSNKVLAEYK | 0.675 | 33.81 | 0.25 |
| HLA-A1101 | ITNLLKHIAK | 0.627 | 56.52 | 0.40 |
| HLA-A1101 | HIAKAQELYK | 0.618 | 62.16 | 0.50 |
| HLA-A1101 | TAFSSYYWLYK | 0.730 | 18.64 | 0.10 |
| HLA-A1101 | SADSMITNLLK | 0.695 | 27.15 | 0.17 |
| HLA-A1101 | TVSQFLFELGK | 0.623 | 58.93 | 0.40 |
|  |  |  |  |  |
| HLA-A2301 | GYQQAALKW | 0.565 | 110.82 | 0.40 |
| HLA-A2301 | KWGKKLYELF | 0.732 | 18.22 | 0.06 |
| HLA-A2301 | KYIMAFNPPW | 0.696 | 26.81 | 0.10 |
| HLA-A2301 | LYELFADDSF | 0.664 | 37.96 | 0.15 |
| HLA-A2301 | TFPTVSQFLF | 0.630 | 54.52 | 0.20 |
|  |  |  |  |  |
| HLA-A2402 | TFPTVSQFL | 0.549 | 132.30 | 0.25 |
| HLA-A2402 | GYQQAALKW | 0.477 | 285.85 | 0.50 |
| HLA-A2402 | KWGKKLYEL | 0.476 | 288.57 | 0.50 |
| HLA-A2402 | TFPTVSQFLF | 0.737 | 17.13 | 0.02 |
| HLA-A2402 | KWGKKLYELF | 0.723 | 19.96 | 0.03 |
| HLA-A2402 | KYIMAFNPPW | 0.640 | 49.11 | 0.09 |
| HLA-A2402 | TGYQQAALKW | 0.540 | 145.01 | 0.30 |
| HLA-A2402 | ETFPTVSQFLF | 0.556 | 122.19 | 0.25 |
| HLA-A2402 | TFPTVSQFLFE | 0.539 | 146.95 | 0.30 |
| HLA-A2402 | MKWGKKLYELF | 0.526 | 168.13 | 0.30 |
| HLA-A2402 | KWGKKLYELFA | 0.509 | 203.63 | 0.40 |
|  |  |  |  |  |
| HLA-A2403 | GYQQAALKW | 0.877 | 3,78 | 0.03 |
| HLA-A2403 | KWGKKLYEL | 0.789 | 9,8 | 0.10 |
| HLA-A2403 | TFPTVSQFL | 0.714 | 22,12 | 0.20 |
| HLA-A2403 | KYIMAFNPP | 0.605 | 71.85 | 0.40 |
| HLA-A2403 | AFSSYYWLY | 0.588 | 85.86 | 0.50 |
| HLA-A2403 | AFNPPWGDI | 0.562 | 114.84 | 0.50 |
| HLA-A2403 | KYIMAFNPPW | 0.575 | 99.12 | 0.50 |
|  |  |  |  |  |
| HLA-A2501 | ETFPTVSQF | 0.600 | 75.80 | 0.01 |
| HLA-A2501 | KTVEALNGY | 0.521 | 177.89 | 0.02 |
| HLA-A2501 | DTFTNSYSF | 0.392 | 718.04 | 0.08 |
| HLA-A2501 | ESVPNLDRF | 0.344 | 1211.18 | 0.12 |
| HLA-A2501 | SVKEMLSDM | 0.323 | 1525.10 | 0.17 |
| HLA-A2501 | EIVMSVKEM | 0.302 | 1911.55 | 0.20 |
| HLA-A2501 | ELYKNSSAL | 0.286 | 2271.83 | 0.25 |
| HLA-A2501 | PKIEQLTGY | 0.257 | 3098.97 | 0.40 |
| HLA-A2501 | LTAGRISEM | 0.247 | 3471.55 | 0.40 |
| HLA-A2501 | TIKSWDESY | 0.232 | 4076.25 | 0.50 |
| HLA-A2501 | QIDTAFSSY | 0.229 | 4180.27 | 0.50 |
| HLA-A2501 | FVFQMASAT | 0.225 | 4393.22 | 0.50 |
| HLA-A2501 | QSAQIDTAF | 0.218 | 4744.93 | 0.50 |
| HLA-A2501 | ETFPTVSQFL | 0.229 | 4176.16 | 0.50 |
| HLA-A2501 | PETFPTVSQF | 0.217 | 4753.31 | 0.50 |
| HLA-A2501 | DVPKIEQLTGY | 0.251 | 3313.84 | 0.40 |
|  |  |  |  |  |
| HLA-A2601 | ETFPTVSQF | 0.822 | 6,83 | 0.01 |
| HLA-A2601 | DTFTNSYSF | 0.560 | 116.85 | 0.12 |
| HLA-A2601 | LTAGRISEM | 0.537 | 149.39 | 0.15 |
| HLA-A2601 | HIAKAQELY | 0.495 | 234.91 | 0.20 |
| HLA-A2601 | EIVMSVKEM | 0.465 | 326.49 | 0.25 |
| HLA-A2601 | SVKEMLSDM | 0.421 | 523.64 | 0.40 |
| HLA-A2601 | ESVPNLDRF | 0.410 | 594.56 | 0.40 |
| HLA-A2601 | KTVEALNGY | 0.408 | 606.12 | 0.40 |
| HLA-A2601 | FVKGKYIMAF | 0.597 | 78.61 | 0.10 |
| HLA-A2601 | ETFPTVSQFL | 0.489 | 251.60 | 0.20 |
| HLA-A2601 | EATKFCAPIY | 0.405 | 628.05 | 0.40 |
| HLA-A2601 | PETFPTVSQF | 0.403 | 637.61 | 0.40 |
| HLA-A2601 | QIDTAFSSYY | 0.358 | 1043.46 | 0.50 |
| HLA-A2601 | DVPKIEQLTGY | 0.626 | 57.24 | 0.08 |
| HLA-A2601 | DTAFSSYYWLY | 0.488 | 254.10 | 0.20 |
| HLA-A2601 | ETFPTVSQFLF | 0.396 | 689.25 | 0.40 |
|  |  |  |  |  |
| HLA-B0702 | TPMKWGKKL | 0.776 | 11,35 | 0.05 |
| HLA-B0702 | RVNANTAAL | 0.748 | 15.22 | 0.07 |
| HLA-B0702 | MIRRRNLIL | 0.615 | 64.31 | 0.30 |
| HLA-B0702 | VPNLDRFVF | 0.564 | 111.94 | 0.50 |
| HLA-B0702 | STPMKWGKKL | 0.723 | 19.95 | 0.10 |
| HLA-B0702 | TPMKWGKKLY | 0.553 | 125.97 | 0.50 |
|  |  |  |  |  |
| HLA-B0801 | MIRRRNLIL | 0.883 | 3,54 | 0.01 |
| HLA-B0801 | ELYKNSSAL | 0.566 | 109.27 | 0.30 |
| HLA-B0801 | RIYMHPAVL | 0.555 | 123.73 | 0.40 |
| HLA-B0801 | DMIRRRNLIL | 0.827 | 6,49 | 0.01 |
| HLA-B0801 | MIRRRNLILN | 0.746 | 15.69 | 0.04 |
| HLA-B0801 | FVKGKYIMAF | 0.548 | 133.21 | 0.40 |
| HLA-B0801 | SDMIRRRNLIL | 0.673 | 34.48 | 0.10 |
| HLA-B0801 | MLSDMIRRRNL | 0.589 | 85.37 | 0.25 |
| HLA-B0801 | DMIRRRNLILN | 0.556 | 121.55 | 0.40 |
|  |  |  |  |  |
| HLA-B0802 | MIRRRNLIL | 0.302 | 1912.50 | 0.01 |
| HLA-B0802 | DMIRRRNLI | 0.229 | 4206.36 | 0.05 |
| HLA-B0802 | EMNRWFEEF | 0.209 | 5204.32 | 0.07 |
| HLA-B0802 | TKKMKKALL | 0.166 | 8257.08 | 0.20 |
| HLA-B0802 | WGKKLYELF | 0.161 | 8752.28 | 0.20 |
| HLA-B0802 | FQQNRIYMH | 0.152 | 9638.98 | 0.30 |
| HLA-B0802 | FPTVSQFLF | 0.149 | 9973.27 | 0.30 |
|  |  |  |  |  |
| HLA-B0803 | MIRRRNLIL | 0.236 | 3882.37 | 0.06 |
| HLA-B0803 | ALRAQSAQI | 0.200 | 5750.58 | 0.15 |
| HLA-B0803 | KMKKALLST | 0.191 | 6362.99 | 0.20 |
| HLA-B0803 | DMIRRRNLI | 0.180 | 7122.22 | 0.25 |
| HLA-B0803 | YMHPAVLTA | 0.175 | 7500.91 | 0.30 |
| HLA-B0803 | EMNRWFEEF | 0.172 | 7793.78 | 0.30 |
| HLA-B0803 | FQQNRIYMH | 0.166 | 8311.30 | 0.40 |
| HLA-B0803 | WGKKLYELF | 0.161 | 8804.61 | 0.40 |
| HLA-B0803 | TKKMKKALL | 0.157 | 9174.25 | 0.50 |
| HLA-B0803 | ELYKNSSAL | 0.154 | 9456.04 | 0.50 |
|  |  |  |  |  |
| HLA-B1402 | ELYKNSSAL | 0.406 | 618.59 | 0.08 |
| HLA-B1402 | MIRRRNLIL | 0.396 | 686.49 | 0.10 |
| HLA-B1402 | DMIRRRNLI | 0.343 | 1217.58 | 0.25 |
| HLA-B1402 | LTAGRISEM | 0.326 | 1465.05 | 0.30 |
| HLA-B1402 | SSALRAQSA | 0.313 | 1698.78 | 0.40 |
| HLA-B1402 | DIGFRVNAN | 0.308 | 1786.28 | 0.40 |
| HLA-B1402 | RVNANTAAL | 0.298 | 1989.24 | 0.50 |
|  |  |  |  |  |
| HLA-B1501 | LSNKVLAEY | 0.652 | 43.41 | 0.40 |
| HLA-B1501 | RISEMGVCF | 0.629 | 55.47 | 0.50 |
| HLA-B1501 | AQIDTAFSSY | 0.896 | 3,09 | 0.01 |
| HLA-B1501 | AQSAQIDTAF | 0.798 | 8,91 | 0.04 |
| HLA-B1501 | GLVDTFTNSY | 0.780 | 10,86 | 0.06 |
| HLA-B1501 | FVKGKYIMAF | 0.697 | 26.51 | 0.25 |
| HLA-B1501 | ALSNKVLAEY | 0.641 | 48.55 | 0.50 |
| HLA-B1501 | SAQIDTAFSSY | 0.655 | 41.91 | 0.40 |
|  |  |  |  |  |
| HLA-B1502 | SLVGKQSPF | 0.634 | 52.62 | 0.02 |
| HLA-B1502 | YIMAFNPPW | 0.532 | 157.64 | 0.09 |
| HLA-B1502 | ELYKNSSAL | 0.503 | 217.23 | 0.12 |
| HLA-B1502 | KQSPFQNAY | 0.421 | 527.68 | 0.30 |
| HLA-B1502 | TIKSWDESY | 0.406 | 619.00 | 0.40 |
| HLA-B1502 | YELFADDSF | 0.400 | 662.31 | 0.40 |
| HLA-B1502 | PMKWGKKLY | 0.391 | 723.52 | 0.40 |
| HLA-B1502 | QSAQIDTAF | 0.370 | 911.11 | 0.50 |
|  |  |  |  |  |
| HLA-B1503 | KQSPFQNAY | 0.866 | 4,26 | 0.03 |
| HLA-B1503 | VKGKYIMAF | 0.827 | 6,47 | 0.07 |
| HLA-B1503 | KKALLSTPM | 0.766 | 12,58 | 0.17 |
| HLA-B1503 | LKWRKDIGF | 0.759 | 13.53 | 0.20 |
| HLA-B1503 | RIYMHPAVL | 0.720 | 20.70 | 0.30 |
| HLA-B1503 | ETFPTVSQF | 0.711 | 22.86 | 0.40 |
| HLA-B1503 | SALVEATKF | 0.676 | 33.47 | 0.50 |
| HLA-B1503 | YKVPGEIVM | 0.674 | 34.17 | 0.50 |
| HLA-B1503 | KAGVTPETF | 0.666 | 37.02 | 0.50 |
|  |  |  |  |  |
| HLA-B1509 | KHIAKAQEL | 0.517 | 185.75 | 0.03 |
| HLA-B1509 | YKVPGEIVM | 0.459 | 349.62 | 0.05 |
| HLA-B1509 | EHVDWCREF | 0.393 | 711.49 | 0.12 |
| HLA-B1509 | TPMKWGKKL | 0.385 | 773.42 | 0.12 |
| HLA-B1509 | EHLLHQSLV | 0.357 | 1048.91 | 0.15 |
| HLA-B1509 | ELYKNSSAL | 0.353 | 1094.44 | 0.17 |
| HLA-B1509 | NRIYMHPAV | 0.302 | 1914.77 | 0.30 |
| HLA-B1509 | RIYMHPAVL | 0.257 | 3110.86 | 0.50 |
| HLA-B1509 | KKALLSTPM | 0.248 | 3412.52 | 0.50 |
|  |  |  |  |  |
| HLA-B1517 | KTVEALNGY | 0.921 | 2,35 | 0.03 |
| HLA-B1517 | ETFPTVSQF | 0.882 | 3,59 | 0.08 |
| HLA-B1517 | LTAGRISEM | 0.857 | 4,72 | 0.12 |
| HLA-B1517 | LSNKVLAEY | 0.849 | 5,1 | 0.15 |
| HLA-B1517 | QSAQIDTAF | 0.726 | 19.46 | 0.40 |
| HLA-B1517 | RVNANTAAL | 0.705 | 24.45 | 0.50 |
| HLA-B1517 | ATKFCAPIY | 0.704 | 24.49 | 0.50 |
| HLA-B1517 | LTGYQQAAL | 0.696 | 26.76 | 0.50 |
| HLA-B1517 | KTIVKLFEV | 0.689 | 28.97 | 0.50 |
| HLA-B1517 | RISEMGVCF | 0.687 | 29.51 | 0.50 |
| HLA-B1517 | SALVEATKF | 0.680 | 31.81 | 0.50 |
| HLA-B1517 | KTGFNIQDM | 0.679 | 32.30 | 0.50 |
|  |  |  |  |  |
| HLA-B1801 | YELFADDSF | 0.692 | 27.94 | 0.12 |
| HLA-B1801 | SEHLLHQSL | 0.620 | 60.81 | 0.20 |
| HLA-B1801 | DTFTNSYSF | 0.514 | 192.80 | 0.40 |
| HLA-B1801 | DEMNRWFEEF | 0.615 | 64.56 | 0.20 |
| HLA-B1801 | KDEMNRWFEEF | 0.504 | 213.99 | 0.50 |
|  |  |  |  |  |
| HLA-B2705 | RRRNLILNR | 0.655 | 41.98 | 0.17 |
| HLA-B2705 | NRWFEEFKK | 0.562 | 113.86 | 0.50 |
| HLA-B2705 | RRRNLILNRG | 0.598 | 77.15 | 0.40 |
| HLA-B2705 | FRVNANTAAL | 0.587 | 87.35 | 0.40 |
|  |  |  |  |  |
| HLA-B2720 | KKALLSTPM | 0.736 | 17.39 | 0.08 |
| HLA-B2720 | NRIYMHPAV | 0.690 | 28.50 | 0.12 |
| HLA-B2720 | KQPRGTKKM | 0.603 | 73.10 | 0.25 |
| HLA-B2720 | YYWLYKAGV | 0.561 | 115.35 | 0.30 |
| HLA-B2720 | RIYMHPAVL | 0.535 | 153.63 | 0.40 |
| HLA-B2720 | REFVKGKYI | 0.531 | 160.06 | 0.40 |
| HLA-B2720 | ELYKNSSAL | 0.511 | 198.69 | 0.40 |
| HLA-B2720 | YIMAFNPPW | 0.481 | 273.85 | 0.50 |
|  |  |  |  |  |
| HLA-B3501 | FPTVSQFLF | 0.788 | 9,93 | 0.06 |
| HLA-B3501 | LVDTFTNSY | 0.717 | 21.27 | 0.12 |
| HLA-B3501 | MASATDDAQ | 0.668 | 36.41 | 0.20 |
| HLA-B3501 | VPNLDRFVF | 0.665 | 37.52 | 0.25 |
| HLA-B3501 | QSAQIDTAF | 0.639 | 49.70 | 0.30 |
| HLA-B3501 | FVFQMASAT | 0.616 | 63.40 | 0.40 |
| HLA-B3501 | LSNKVLAEY | 0.597 | 78.36 | 0.40 |
| HLA-B3501 | YKVPGEIVM | 0.562 | 114.36 | 0.50 |
|  |  |  |  |  |
| HLA-B3503 | FPTVSQFLF | 0.595 | 80.12 | 0.01 |
| HLA-B3503 | VPNLDRFVF | 0.344 | 1215.61 | 0.04 |
| HLA-B3503 | YKVPGEIVM | 0.177 | 7343.91 | 0.40 |
| HLA-B3503 | VPKIEQLTG | 0.162 | 8680.69 | 0.40 |
| HLA-B3503 | FPTVSQFLFE | 0.353 | 1099.65 | 0.04 |
| HLA-B3503 | TFPTVSQFLF | 0.339 | 1281.07 | 0.05 |
| HLA-B3503 | FPTVSQFLFEL | 0.379 | 829.91 | 0.03 |
| HLA-B3503 | ETFPTVSQFLF | 0.305 | 1837.49 | 0.07 |
| HLA-B3503 | TFPTVSQFLFE | 0.301 | 1930.11 | 0.07 |
|  |  |  |  |  |
| HLA-B3801 | DRASADSMI | 0.356 | 1063.42 | 0.40 |
| HLA-B3801 | EHLLHQSLV | 0.345 | 1199.50 | 0.40 |
| HLA-B3801 | GHTKSILNL | 0.325 | 1490.13 | 0.50 |
|  |  |  |  |  |
| HLA-B3901 | NRIYMHPAV | 0.599 | 76.39 | 0.15 |
| HLA-B3901 | YKVPGEIVM | 0.571 | 103.53 | 0.20 |
| HLA-B3901 | ELYKNSSAL | 0.526 | 168.37 | 0.25 |
| HLA-B3901 | SEHLLHQSL | 0.473 | 298.25 | 0.40 |
| HLA-B3901 | TPMKWGKKL | 0.462 | 336.78 | 0.40 |
| HLA-B3901 | KHIAKAQEL | 0.437 | 443.06 | 0.50 |
| HLA-B3901 | FRVNANTAA | 0.428 | 487.44 | 0.50 |
| HLA-B3901 | FRVNANTAAL | 0.474 | 295.33 | 0.40 |
|  |  |  |  |  |
| HLA-B4001 | SEHLLHQSL | 0.748 | 15.35 | 0.07 |
| HLA-B4001 | AETEGKGIF | 0.686 | 29.95 | 0.15 |
| HLA-B4001 | YELFADDSF | 0.669 | 36.08 | 0.17 |
| HLA-B4001 | AEYKVPGEI | 0.618 | 62.10 | 0.25 |
| HLA-B4001 | IEVNNKDEM | 0.558 | 118.95 | 0.40 |
| HLA-B4001 | SEMGVCFGTI | 0.630 | 54.86 | 0.25 |
| HLA-B4001 | ASEHLLHQSL | 0.596 | 79.36 | 0.30 |
| HLA-B4001 | AEYKVPGEIV | 0.571 | 103.66 | 0.40 |
| HLA-B4001 | REFVKGKYIM | 0.566 | 109.76 | 0.40 |
| HLA-B4001 | GEIVMSVKEM | 0.565 | 110.79 | 0.40 |
| HLA-B4001 | FEVQKTGFNI | 0.554 | 124.19 | 0.40 |
| HLA-B4001 | QELYKNSSAL | 0.540 | 145.28 | 0.50 |
| HLA-B4001 | FEEFKKGNGL | 0.535 | 153.19 | 0.50 |
| HLA-B4001 | GEIVMSVKEML | 0.514 | 192.04 | 0.50 |
|  |  |  |  |  |
| HLA-B4002 | SEHLLHQSL | 0.753 | 14.51 | 0.01 |
| HLA-B4002 | AEYKVPGEI | 0.656 | 41.13 | 0.10 |
| HLA-B4002 | REFVKGKYI | 0.652 | 43.35 | 0.12 |
| HLA-B4002 | YECAWVSST | 0.565 | 111.13 | 0.40 |
| HLA-B4002 | SEMGVCFGT | 0.552 | 127.28 | 0.40 |
| HLA-B4002 | REFVKGKYIM | 0.671 | 35.20 | 0.08 |
| HLA-B4002 | ASEHLLHQSL | 0.661 | 39.27 | 0.09 |
| HLA-B4002 | SEMGVCFGTI | 0.661 | 39.27 | 0.09 |
| HLA-B4002 | QELYKNSSAL | 0.618 | 62.22 | 0.20 |
| HLA-B4002 | GEIVMSVKEM | 0.606 | 71.25 | 0.25 |
| HLA-B4002 | SEHLLHQSLV | 0.590 | 84.66 | 0.25 |
| HLA-B4002 | FEVQKTGFNI | 0.560 | 116.80 | 0.40 |
|  |  |  |  |  |
| HLA-B4013 | TAFSSYYWL | 0.504 | 213.29 | 0.07 |
| HLA-B4013 | REFVKGKYI | 0.445 | 405.91 | 0.15 |
| HLA-B4013 | YIMAFNPPW | 0.423 | 516.47 | 0.20 |
| HLA-B4013 | RIYMHPAVL | 0.412 | 581.73 | 0.25 |
| HLA-B4013 | DMIRRRNLI | 0.398 | 675.75 | 0.25 |
| HLA-B4013 | DTFTNSYSF | 0.343 | 1218.91 | 0.50 |
| HLA-B4013 | YYWLYKAGV | 0.323 | 1519.86 | 0.50 |
|  |  |  |  |  |
| HLA-C0303 | ELYKNSSAL | 0.781 | 10,72 | 0.08 |
| HLA-C0303 | RVNANTAAL | 0.753 | 14.48 | 0.12 |
| HLA-C0303 | TAFSSYYWL | 0.748 | 15.34 | 0.12 |
| HLA-C0303 | YKVPGEIVM | 0.723 | 20,12 | 0.17 |
| HLA-C0303 | VANPDDAAQ | 0.602 | 74.07 | 0.40 |
| HLA-C0303 | EATKFCAPI | 0.599 | 76.42 | 0.40 |
| HLA-C0303 | RIYMHPAVL | 0.587 | 87.46 | 0.40 |
| HLA-C0303 | TAALSNKVL | 0.543 | 141.12 | 0.50 |
|  |  |  |  |  |
| HLA-C0401 | TFPTVSQFL | 0.319 | 1580.85 | 0.02 |
| HLA-C0401 | SWDESYTEL | 0.292 | 2133.18 | 0.05 |
| HLA-C0401 | WFEKNAGTI | 0.265 | 2836.69 | 0.08 |
| HLA-C0401 | LYKNSSALR | 0.240 | 3729.97 | 0.17 |
| HLA-C0401 | FEKNAGTIK | 0.229 | 4205.73 | 0.25 |
| HLA-C0401 | TVEALNGYL | 0.226 | 4322.58 | 0.25 |
| HLA-C0401 | RIYMHPAVL | 0.219 | 4657.95 | 0.30 |
| HLA-C0401 | TPMKWGKKL | 0.219 | 4687.67 | 0.40 |
| HLA-C0401 | YIMAFNPPW | 0.206 | 5377.76 | 0.50 |
|  |  |  |  |  |
| HLA-C0501 | FADDSFQQN | 0.626 | 56.91 | 0.09 |
| HLA-C0501 | LVDTFTNSY | 0.607 | 70.26 | 0.10 |
| HLA-C0501 | YLDKHKDEV | 0.579 | 95.18 | 0.12 |
| HLA-C0501 | SADSMITNL | 0.546 | 136.66 | 0.15 |
| HLA-C0501 | NKDEMNRWF | 0.527 | 166.53 | 0.17 |
| HLA-C0501 | HVDWCREFV | 0.518 | 184.07 | 0.17 |
| HLA-C0501 | SWDESYTEL | 0.415 | 558.00 | 0.40 |
| HLA-C0501 | RISEMGVCF | 0.404 | 633.79 | 0.40 |
|  |  |  |  |  |
| HLA-C0602 | SFQQNRIYM | 0.421 | 525.32 | 0.30 |
|  |  |  |  |  |
| HLA-C0702 | YYWLYKAGV | 0.459 | 349.63 | 0.12 |
| HLA-C0702 | YKVPGEIVM | 0.435 | 453.95 | 0.15 |
| HLA-C0702 | RIYMHPAVL | 0.377 | 845.85 | 0.30 |
| HLA-C0702 | KQSPFQNAY | 0.366 | 950.36 | 0.40 |
| HLA-C0702 | AFSSYYWLY | 0.322 | 1529.83 | 0.50 |
|  |  |  |  |  |
| HLA-C0802 | YLDKHKDEV | 0.420 | 533.21 | 0.03 |
| HLA-C0802 | FADDSFQQN | 0.330 | 1402.25 | 0.12 |
| HLA-C0802 | LTGYQQAAL | 0.265 | 2841.30 | 0.30 |
| HLA-C0802 | SADSMITNL | 0.264 | 2863.34 | 0.30 |
| HLA-C0802 | IFDEAKKTV | 0.241 | 3680.78 | 0.50 |
| HLA-C0802 | LVDTFTNSY | 0.232 | 4050.71 | 0.50 |
| HLA-C0802 | FADDSFQQNRI | 0.356 | 1060.32 | 0.08 |
|  |  |  |  |  |
| HLA-C1203 | YKVPGEIVM | 0.612 | 66.65 | 0.25 |
| HLA-C1203 | YIMAFNPPW | 0.585 | 89.11 | 0.30 |
| HLA-C1203 | FVFQMASAT | 0.580 | 94.54 | 0.30 |
| HLA-C1203 | YMHPAVLTA | 0.573 | 101.12 | 0.30 |
| HLA-C1203 | RIYMHPAVL | 0.552 | 127.85 | 0.40 |
| HLA-C1203 | NSYSFCESV | 0.548 | 133.40 | 0.40 |
| HLA-C1203 | ETFPTVSQF | 0.536 | 151.76 | 0.40 |
| HLA-C1203 | LVDTFTNSY | 0.515 | 189.88 | 0.50 |
|  |  |  |  |  |
| HLA-C1402 | YIMAFNPPW | 0.738 | 17,04 | 0.06 |
| HLA-C1402 | YYWLYKAGV | 0.698 | 26.33 | 0.09 |
| HLA-C1402 | ELYKNSSAL | 0.668 | 36.19 | 0.12 |
| HLA-C1402 | RVNANTAAL | 0.665 | 37.62 | 0.12 |
| HLA-C1402 | SFQQNRIYM | 0.624 | 58.49 | 0.20 |
| HLA-C1402 | TFPTVSQFL | 0.623 | 59.37 | 0.20 |
| HLA-C1402 | RIYMHPAVL | 0.618 | 62.48 | 0.20 |
| HLA-C1402 | SYYWLYKAG | 0.547 | 133.79 | 0.40 |
| HLA-C1402 | YMHPAVLTA | 0.544 | 139.61 | 0.40 |
| HLA-C1402 | VTPETFPTV | 0.518 | 184.57 | 0.50 |
| HLA-C1402 | SWDESYTEL | 0.511 | 198.68 | 0.50 |
| HLA-C1402 | KQPRGTKKM | 0.506 | 210.32 | 0.50 |
|  |  |  |  |  |
| HLA-C1502 | KTIVKLFEV | 0.660 | 39.49 | 0.02 |
| HLA-C1502 | RIYMHPAVL | 0.625 | 57.76 | 0.04 |
| HLA-C1502 | NSYSFCESV | 0.597 | 78.35 | 0.07 |
| HLA-C1502 | DSIYASALV | 0.522 | 176.92 | 0.17 |
| HLA-C1502 | RVNANTAAL | 0.472 | 302.66 | 0.30 |
| HLA-C1502 | NTAALSNKV | 0.461 | 339.42 | 0.30 |
| HLA-C1502 | LTAGRISEM | 0.455 | 363.49 | 0.40 |
| HLA-C1502 | KHIAKAQEL | 0.422 | 522.19 | 0.50 |
|  |  |  |  |  |
| HLA-E0101 | MIRRRNLIL | 0.223 | 4465.05 | 0.08 |

**Supplementary Table 4** Prediction of MHC-I epitopes with binding affinity to CCHFV-NP using the Rankpep database (August 2020 data)

| **Allele** | **Sequence** | **Score** | **Optimal score (%)** |
| --- | --- | --- | --- |
| HLA-A0201 | ALRAQSAQI | 93.0 | 72.66 % |
| MITNLLKHI | 81.0 | 63.28 % |
| LVATGLAKL | 81.0 | 63.28 % |
| ELYKNSSAL | 77.0 | 60.16 % |
| TVSQFLFEL | 75.0 | 58.59 % |
| IVMSVKEML | 73.0 | 57.03 % |
| RVNANTAAL | 72.0 | 56.25 % |
| NLLKHIAKA | 69.0 | 53.91 % |
| SVKEMLSDM | 66.0 | 51.56 % |
| EIVMSVKEM | 66.0 | 51.56 % |
| NLDRFVFQM | 66.0 | 51.56 % |
| ALVEATKFC | 65.0 | 50.78 % |
| ELKVDVPKI | 64.0 | 50.00 % |
| HLA-A0301 | LLHQSLVGK | 16.155 | 45.79 % |
| HLA-A1101 | ALVATGLAK | 15.091 | 38.45 % |
| IVKLFEVQK | 13.545 | 33.68 % |
| HLA-B0702 | FPTVSQFLF | 21.268 | 52.63 % |
| APIYECAWV | 18.181 | 44.99 % |
| HLA-B2705 | RRRNLILNR | 22.676 | 48.14 % |
| HLA-B3501 | TPMKWGKKL | 20.748 | 52.06 % |
| FPTVSQFLF | 20.61 | 51.71 % |

**Supplementary Table 5** VaxiJen antigenicity scores of predicted MHC-I peptides

| **Peptide** | **Score** | **Peptide** | **Score** |
| --- | --- | --- | --- |
| ALVATGLAK | 0.6524 | EHLLHQSLV | -0.0526 |
| AQIDTAFSSY | 0.4241 | ELYKNSSAL | -0.3171 |
| AQSAQIDTAF | 0.5474 | ESVPNLDRF | -0.5398 |
| ASALVEATK | 0.6406 | ETFPTVSQF | 0.2140 |
| DMIRRRNLIL | 0.9159 | ETFPTVSQFL | -0.0621 |
| DTAFSSYYWLY | 0.4672 | ETFPTVSQFLF | 0.0571 |
| EIVMSVKEM | 1.1743 | FPTVSQFLF | 0.0669 |
| FVKGKYIMAF | 0.4541 | FRVNANTAA | -0.2638 |
| GYQQAALKW | 0.4828 | FRVNANTAAL | -0.1279 |
| IALVATGLAK | 0.9752 | FSSYYWLYK | 0.0300 |
| KHIAKAQEL | 0.4875 | GHTKSILNL | 0.1211 |
| KQSPFQNAY | 0.4510 | GLVDTFTNSY | -0.5851 |
| KWGKKLYEL | 0.4993 | HIAKAQELY | 0.2572 |
| KYIMAFNPPW | 0.3023 | HIAKAQELYK | -0.0899 |
| LTAGRISEM | 1.1429 | HLLHQSLVGK | 0.2662 |
| MIRRRNLIL | 1.4458 | IFDEAKKTV | 0.0398 |
| NRIYMHPAV | 0.3896 | KALLSTPMK | -0.2636 |
| QIDTAFSSY | 0.4380 | KTIVKLFEV | -0.4941 |
| QIDTAFSSYY | 0.3701 | KTVEALNGY | 0.2957 |
| QSAQIDTAF | 0.5882 | KWGKKLYELF | 0.1699 |
| REFVKGKYI | 0.3071 | LLHQSLVGK | 0.1809 |
| RISEMGVCF | 1.1847 | LSNKVLAEY | 0.1183 |
| RIYMHPAVL | 0.5250 | LVDTFTNSY | -0.7712 |
| RRRNLILNR | 0.9350 | LVDTFTNSYS | -0.7375 |
| SAQIDTAFSSY | 0.4124 | LYELFADDSF | -0.4497 |
| SLVGKQSPF | 1.2622 | NGLVDTFTNSY | -0.9160 |
| STPMKWGKKL | 1.1821 | NRWFEEFKK | -1.1625 |
| SWDESYTEL | 0.4271 | PETFPTVSQF | 0.2373 |
| TAALSNKVL | 0.5152 | QELYKNSSAL | -0.2640 |
| TGYQQAALKW | 0.5764 | RVNANTAAL | -0.0917 |
| TIKSWDESY | 0.4218 | SADSMITNL | 0.0149 |
| VSSTGIVKK | 0.6587 | SEHLLHQSL | -0.0428 |
| VTPETFPTV | 0.6477 | SFQQNRIYM | 0.2415 |
| YMHPAVLTA | 0.8430 | SQFLFELGK | 0.0968 |
| ADSMITNLLK | -0.4609 | SVKEMLSDM | -0.1763 |
| AEYKVPGEI | -0.0062 | TFPTVSQFL | -0.0424 |
| ALNGYLDKHK | -0.4939 | TFPTVSQFLF | 0.0905 |
| ALSNKVLAEY | 0.1692 | TVSQFLFEL | 0.0184 |
| ASEHLLHQSL | -0.0660 | VPNLDRFVF | -0.8266 |
| ATDDAQKDSIY | -0.0242 | WFEKNAGTI | 0.1982 |
| DEMNRWFEEF | -1.2820 | YELFADDSF | -0.2713 |
| DRASADSMI | -0.0211 | YKVPGEIVM | -0.1450 |
| DTFTNSYSF | -0.6681 | YLDKHKDEV | -0.1799 |
| DVPKIEQLTGY | -0.3344 |  |  |

*Threshold: >0.4

**Supplementary Table 6** Predicted Antigenic Peptides antigenicity scores of predicted MHC-I peptides

| **Predicted Antigenic Peptides** |
| --- |
| **Peptides** |
| NSYSFCESVPNLDRFVFQ |
| KDSIYASALVEATKFCAPIYECAWVSSTGIVKK |
| TELKVDVPKI |
| QLTGYQQAAL |
| ALSNKVLAEYKVPGEIVMSVKE |
| RGPVSHEHVDWCRE |
| SGIALVATGLAK |
| KTVEALNG |
| ITNLLKHIAKAQE |
| SALRAQSAQIDTAFSSYYWLYKAGVTP |
| TFPTVSQFLFEL |
| YMHPAVLTA |
| EMGVCFGTIPVAN |
| CAKTIVKLFEVQ |
| DMDIVASEHLLHQSLVGKQ |

**Supplementary Table 7** The online immunoinformatics tools **VaxiJen** and **Prediction of Anti-Inflammatory Peptides,** the antigenicity scores of **CCHF-NP MHC-I epitopes**

| **Peptides** | **VaxiJen** | **Prediction of Anti-Inflammatory Peptides** | **Peptides** | **VaxiJen** | **Prediction of Anti-Inflammatory Peptides** | **Peptides** | **VaxiJen** | **Prediction of Anti-Inflammatory Peptides** | **Peptides** | **VaxiJen** | **Prediction of Anti-Inflammatory Peptides** |
| --- | --- | --- | --- | --- | --- | --- | --- | --- | --- | --- | --- |
| ALSNKVLAEYK | 0.5327 # | 0.426 ** | DVPKIEQLTGY | -0.3344 | 0.359 *** | RISEMGVCF | 1.1847 # | 0.497 * | LSNKVLAEY | 0.1183 | 0.381 *** |
| ALVATGLAK | 0.6524 # | 0.300 | EHLLHQSLV | -0.0526 | 0.454 ** | RIYMHPAVL | 0.5250 # | 0.585 * | LVDTFTNSY | -0.7712 | 0.419 ** |
| AQIDTAFSSY | 0.4241 # | 0.387 *** | ELYKNSSAL | -0.3171 | 0.356 *** | RRRNLILNR | 0.9350 # | 0.543 * | LVDTFTNSYS | -0.7375 | 0.396 ** |
| AQSAQIDTAF | 0.5474 # | 0.402 ** | ESVPNLDRF | -0.5398 | 0.412 ** | SAQIDTAFSSY | 0.4124 # | 0.388 ** | LYELFADDSF | -0.4497 | 0.465 ** |
| ASALVEATK | 0.6406 # | 0.359 *** | ETFPTVSQF | 0.2140 | 0.397 ** | SLVGKQSPF | 1.2622 # | 0.404 ** | NGLVDTFTNSY | -0.9160 | 0.364 *** |
| DMIRRRNLIL | 0.9159 # | 0.653 * | ETFPTVSQFL | -0.0621 | 0.398 ** | STPMKWGKKL | 1.1821 # | 0.447 ** | NRWFEEFKK | -1.1625 | 0.474 * |
| DTAFSSYYWLY | 0.4672 # | 0.414 ** | ETFPTVSQFLF | 0.0571 | 0.434 ** | SWDESYTEL | 0.4271 # | 0.327 | PETFPTVSQF | 0.2373 | 0.408 ** |
| EIVMSVKEM | 1.1743 # | 0.521 * | FPTVSQFLF | 0.0669 | 0.360 *** | TAALSNKVL | 0.515 # | 0.444 ** | QELYKNSSAL | -0.2640 | 0.399 ** |
| FVKGKYIMAF | 0.4541 # | 0.514 * | FRVNANTAA | -0.2638 | 0.341 | TGYQQAALKW | 0.5764 # | 0.496 * | RVNANTAAL | -0.0917 | 0.359 *** |
| GYQQAALKW | 0.4828 # | 0.468 * | FRVNANTAAL | -0.1279 | 0.431 ** | TIKSWDESY | 0.4218 # | 0.417 ** | SADSMITNL | 0.0149 | 0.454 ** |
| IALVATGLAK | 0.9752 # | 0.350 *** | FSSYYWLYK | 0.0300 | 0.402 ** | VSSTGIVKK | 0.6587 # | 0.339 | SEHLLHQSL | -0.0428 | 0.450 ** |
| KHIAKAQEL | 0.4875 # | 0.423 ** | GHTKSILNL | 0.1211 | 0.389 ** | VTPETFPTV | 0.6477 # | 0.370 *** | SFQQNRIYM | 0.2415 | 0.497 * |
| KQSPFQNAY | 0.4510 # | 0.385 *** | GLVDTFTNSY | -0.5851 | 0.456 ** | YMHPAVLTA | 0.8430 | 0.443 ** | SQFLFELGK | 0.0968 | 0.430 ** |
| KWGKKLYEL | 0.4993 | 0.421 ** | HIAKAQELY | 0.2572 | 0.394 ** | ADSMITNLLK | -0.4609 | 0.509 * | SVKEMLSDM | -0.1763 | 0.416 ** |
| KYIMAFNPPW | 0.3023 | 0.485 * | HIAKAQELYK | -0.0899 | 0.387 *** | AEYKVPGEI | -0.0062 | 0.391 ** | TFPTVSQFL | -0.0424 | 0.342 *** |
| LTAGRISEM | 1.1429 # | 0.407 ** | HLLHQSLVGK | 0.2662 | 0.490 * | ALNGYLDKHK | -0.4939 | 0.447 ** | TFPTVSQFLF | 0.0905 | 0.385 *** |
| MIRRRNLIL | 1.4458 # | 0.635 * | IFDEAKKTV | 0.0398 | 0.383 *** | ALSNKVLAEY | 0.1692 | 0.396 ** | TVSQFLFEL | 0.0184 | 0.381 *** |
| NRIYMHPAV | 0.3896 | 0.536 * | KALLSTPMK | -0.2636 | 0.457 ** | ASEHLLHQSL | -0.0660 | 0.479 * | VPNLDRFVF | -0.8266 | 0.403 ** |
| QIDTAFSSY | 0.4380 # | 0.325 | KTIVKLFEV | -0.4941 | 0.430 ** | ATDDAQKDSIY | -0.0242 | 0.357 *** | WFEKNAGTI | 0.1982 | 0.413 ** |
| QIDTAFSSYY | 0.3701 | 0.402 ** | KTVEALNGY | 0.2957 | 0.384 *** | DEMNRWFEEF | -1.2820 | 0.455 ** | YELFADDSF | -0.2713 | 0.421 ** |
| QSAQIDTAF | 0.5882 # | 0.379 *** | KWGKKLYELF | 0.1699 | 0.433 ** | DRASADSMI | -0.0211 | 0.335 | YKVPGEIVM | -0.1450 | 0.472 * |
| REFVKGKYI | 0.3071 | 0.457 ** | LLHQSLVGK | 0.1809 | 0.491 * | DTFTNSYSF | -0.6681 | 0.461 ** | YLDKHKDEV | -0.1799 | 0.356 *** |

#: Antigen for VaxiJen (>threshold (0.4)); Antigen for Prediction of Anti-Inflammatory Peptides *: high, **: medium, ***: low

Peptides predicted as antigenic by VaxiJen, as well as those demonstrating high antigenic properties according to the “Prediction of Anti-Inflammatory Peptides” tool, are highlighted in green.

**Supplementary Table 8** Allergenicity analysis of selected epitopes

| **Peptide** | **AllerTOP v2.0** | **Algpred2** | **AllergenFP v1.0** |
| --- | --- | --- | --- |
| ALSNKVLAEYK | Probable Allergen | Allergen | Probable Allergen |
| ALVATGLAK | Probable Non-Allergen | Allergen | Probable Allergen |
| AQIDTAFSSY | Probable Non-Allergen | Allergen | Probable Allergen |
| AQSAQIDTAF | Probable Allergen | Allergen | Probable Non-Allergen |
| ASALVEATK | Probable Non-Allergen | Allergen | Probable Non-Allergen |
| **DMIRRRNLIL** | **Probable Non-Allergen** | **Non-Allergen** | **Probable Non-Allergen** |
| DTAFSSYYWLY | Probable Non-Allergen | Allergen | Probable Allergen |
| EIVMSVKEM | Probable Allergen | Non-Allergen | Probable Allergen |
| FVKGKYIMAF | Probable Non-Allergen | Allergen | Probable Allergen |
| GYQQAALKW | Probable Non-Allergen | Allergen | Probable Allergen |
| IALVATGLAK | Probable Non-Allergen | Allergen | Probable Allergen |
| KHIAKAQEL | Probable Allergen | Allergen | Probable Allergen |
| KQSPFQNAY | Probable Allergen | Allergen | Probable Non-Allergen |
| KWGKKLYEL | Probable Non-Allergen | Allergen | Probable Allergen |
| KYIMAFNPPW | Probable Non-Allergen | Allergen | Probable Non-Allergen |
| LTAGRISEM | Probable Allergen | Non-Allergen | Probable Allergen |
| MIRRRNLIL | Probable Non-Allergen | Non-Allergen | Probable Allergen |
| NRIYMHPAV | Probable Allergen | Allergen | Probable Non-Allergen |
| QIDTAFSSY | Probable Non-Allergen | Allergen | Probable Allergen |
| QIDTAFSSYY | Probable Non-Allergen | Allergen | Probable Non-Allergen |
| QSAQIDTAF | Probable Allergen | Allergen | Probable Non-Allergen |
| REFVKGKYI | Probable Non-Allergen | Allergen | Probable Non-Allergen |
| RISEMGVCF | Probable Allergen | Allergen | Probable Allergen |
| **RIYMHPAVL** | **Probable Non-Allergen** | **Non-Allergen** | **Probable Non-Allergen** |
| RRRNLILNR | Probable Non-Allergen | Allergen | Probable Allergen |
| SAQIDTAFSSY | Probable Allergen | Allergen | Probable Non-Allergen |
| SLVGKQSPF | Probable Non-Allergen | Allergen | Probable Allergen |
| STPMKWGKKL | Probable Non-Allergen | Allergen | Probable Non-Allergen |
| SWDESYTEL | Probable Non-Allergen | Allergen | Probable Allergen |
| TAALSNKVL | Probable Non-Allergen | Allergen | Probable Allergen |
| TGYQQAALKW | Probable Allergen | Allergen | Probable Allergen |
| TIKSWDESY | Probable Allergen | Allergen | Probable Allergen |
| VSSTGIVKK | Probable Allergen | Allergen | Probable Allergen |
| VTPETFPTV | Probable Allergen | Allergen | Probable Allergen |
| YMHPAVLTA | Probable Non-Allergen | Allergen | Probable Allergen |
| ADSMITNLLK | Probable Allergen | Allergen | Probable Non-Allergen |
| AEYKVPGEI | Probable Allergen | Allergen | Probable Non-Allergen |
| ALNGYLDKHK | Probable Allergen | Allergen | Probable Allergen |
| ALSNKVLAEY | Probable Non-Allergen | Allergen | Probable Allergen |
| ASEHLLHQSL | Probable Allergen | Allergen | Probable Allergen |
| ATDDAQKDSIY | Probable Allergen | Allergen | Probable Non-Allergen |
| DEMNRWFEEF | Probable Allergen | Non-Allergen | Probable Allergen |
| DRASADSMI | Probable Non-Allergen | Allergen | Probable Allergen |
| DTFTNSYSF | Probable Allergen | Allergen | Probable Allergen |
| DVPKIEQLTGY | Probable Allergen | Allergen | Probable Allergen |
| EHLLHQSLV | Probable Allergen | Allergen | Probable Allergen |
| ELYKNSSAL | Probable Non-Allergen | Allergen | Probable Non-Allergen |
| ESVPNLDRF | Probable Non-Allergen | Allergen | Probable Non-Allergen |
| ETFPTVSQF | Probable Non-Allergen | Allergen | Probable Allergen |
| ETFPTVSQFL | Probable Non-Allergen | Allergen | Probable Allergen |
| ETFPTVSQFLF | Probable Allergen | Allergen | Probable Allergen |
| FPTVSQFLF | Probable Allergen | Allergen | Probable Non-Allergen |
| FRVNANTAA | Probable Allergen | Allergen | Probable Allergen |
| FRVNANTAAL | Probable Allergen | Allergen | Probable Allergen |
| FSSYYWLYK | Probable Allergen | Non-Allergen | Probable Allergen |
| GHTKSILNL | Probable Allergen | Allergen | Probable Allergen |
| GLVDTFTNSY | Probable Non-Allergen | Allergen | Probable Allergen |
| HIAKAQELY | Probable Non-Allergen | Allergen | Probable Allergen |
| HIAKAQELYK | Probable Non-Allergen | Allergen | Probable Allergen |
| HLLHQSLVGK | Probable Allergen | Allergen | Probable Non-Allergen |
| IFDEAKKTV | Probable Non-Allergen | Allergen | Probable Allergen |
| KALLSTPMK | Probable Allergen | Allergen | Probable Allergen |
| KTIVKLFEV | Probable Non-Allergen | Allergen | Probable Allergen |
| KTVEALNGY | Probable Non-Allergen | Allergen | Probable Non-Allergen |
| KWGKKLYELF | Probable Non-Allergen | Allergen | Probable Non-Allergen |
| LLHQSLVGK | Probable Allergen | Allergen | Probable Allergen |
| LSNKVLAEY | Probable Allergen | Allergen | Probable Non-Allergen |
| LVDTFTNSY | Probable Non-Allergen | Allergen | Probable Non-Allergen |
| LVDTFTNSYS | Probable Non-Allergen | Allergen | Probable Non-Allergen |
| LYELFADDSF | Probable Allergen | Allergen | Probable Non-Allergen |
| NGLVDTFTNSY | Probable Non-Allergen | Allergen | Probable Allergen |
| NRWFEEFKK | Probable Allergen | Allergen | Probable Allergen |
| PETFPTVSQF | Probable Allergen | Allergen | Probable Allergen |
| QELYKNSSAL | Probable Non-Allergen | Allergen | Probable Non-Allergen |
| RVNANTAAL | Probable Allergen | Allergen | Probable Allergen |
| SADSMITNL | Probable Non-Allergen | Allergen | Probable Allergen |
| SEHLLHQSL | Probable Allergen | Allergen | Probable Allergen |
| SFQQNRIYM | Probable Allergen | Allergen | Probable Allergen |
| SQFLFELGK | Probable Allergen | Allergen | Probable Allergen |
| **SVKEMLSDM** | **Probable Non-Allergen** | **Non-Allergen** | **Probable Non-Allergen** |
| TFPTVSQFL | Probable Allergen | Allergen | Probable Allergen |
| TFPTVSQFLF | Probable Allergen | Allergen | Probable Non-Allergen |
| TVSQFLFEL | Probable Allergen | Allergen | Probable Non-Allergen |
| VPNLDRFVF | Probable Non-Allergen | Allergen | Probable Allergen |
| WFEKNAGTI | Probable Non-Allergen | Allergen | Probable Non-Allergen |
| YELFADDSF | Probable Allergen | Allergen | Probable Non-Allergen |
| YKVPGEIVM | Probable Non-Allergen | Allergen | Probable Allergen |
| YLDKHKDEV | Probable Non-Allergen | Allergen | Probable Allergen |

Non-allergenic peptides (as determined by all three online tools) are highlighted in bold and green.

**Supplementary Table 9** Hydrophobicity analysis of selected epitopes

| **Peptide** | **Peptide v2.0 (%)** | **ToxinPred** | **CSM-Toxin** | **Peptide** | **Peptide v2.0 (%)** | **ToxinPred** | **CSM-Toxin** |
| --- | --- | --- | --- | --- | --- | --- | --- |
| ALSNKVLAEYK | 45.45 | -0.15 | -0.14 | FPTVSQFLF | 66.67 | 0.19 | 1.09 |
| ALVATGLAK | 66.67 | 0.14 | 1.36 | DTFTNSYSF | 22.22 | -0.11 | -0.63 |
| AQIDTAFSSY | 40 | -0.02 | 0.03 | DVPKIEQLTGY | 36.36 | -0.13 | -0.54 |
| AQSAQIDTAF | 50 | -0.04 | 0.07 | EHLLHQSLV | 44.44 | -0.03 | 0.16 |
| ASALVEATK | 55.56 | -0.04 | 0.5 | ELYKNSSAL | 33.33 | -0.17 | -0.49 |
| DMIRRRNLIL | 50 | -0.39 | -0.2 | ESVPNLDRF | 44.44 | -0.27 | -0.73 |
| DTAFSSYYWLY | 36.36 | 0.04 | -0.2 | ETFPTVSQF | 44.44 | -0.03 | -0.11 |
| EIVMSVKEM | 55.56 | -0.03 | 0.56 | ETFPTVSQFL | 50 | 0.03 | 0.28 |
| FVKGKYIMAF | 60 | 0.10 | 0.85 | FRVNANTAA | 55.56 | -0.15 | 0.02 |
| GYQQAALKW | 44.44 | -0.10 | -0.68 | FRVNANTAAL | 60 | -0.08 | 0.4 |
| IALVATGLAK | 70 | 0.20 | 1.67 | FSSYYWLYK | 33.33 | -0.01 | -0.41 |
| KHIAKAQEL | 44.44 | -0.24 | -0.68 | GHTKSILNL | 33.33 | -0.07 | -0.04 |
| KQSPFQNAY | 33.33 3 | -0.29 | -1.5 | GLVDTFTNSY | 30 | -0.01 | -0.01 |
| KWGKKLYEL | 3.33 | -0.26 | -1.13 | HIAKAQELY | 44.44 | -0.11 | -0.39 |
| KYIMAFNPPW | 70 | 0.04 | -0.18 | HIAKAQELYK | 40 | -0.21 | -0.74 |
| LTAGRISEM | 44.44 | -0.10 | 0.23 | HLLHQSLVGK | 40 | -0.06 | 0.06 |
| MIRRRNLIL | 55.56 | -0.35 | 0.17 | IFDEAKKTV | 44.44 | -0.18 | -0.24 |
| NRIYMHPAV | 55.56 | -0.12 | -0.19 | KALLSTPMK | 55.56 | -0.13 | 0.04 |
| QIDTAFSSY | 33.33 | -0.06 | -0.17 | KTIVKLFEV | 55.56 | -0.01 | 0.83 |
| QIDTAFSSYY | 30 | -0.05 | -0.28 | KTVEALNGY | 33.33 | -0.12 | -0.39 |
| QSAQIDTAF | 44.44 | -0.08 | -0.12 | KWGKKLYELF | 40 | -0.17 | -0.74 |
| REFVKGKYI | 33.33 | -0.28 | -0.67 | LLHQSLVGK | 44.44 | -0.02 | 0.42 |
| RISEMGVCF | 44.44 | -0.03 | 0.74 | LSNKVLAEY | 44.44 | -0.08 | 0.07 |
| RIYMHPAVL | 66.67 | 0.01 | 0.62 | LVDTFTNSY | 33.33 | -0.03 | 0.03 |
| RRRNLILNR | 33.33 | -0.73 | -1.43 | LVDTFTNSYS | 30 | -0.05 | -0.05 |
| SAQIDTAFSSY | 36.36 | -0.05 | -0.05 | LYELFADDSF | 50 | 0.02 | 0.24 |
| SLVGKQSPF | 44.44 | -0.06 | -0.02 | NGLVDTFTNSY | 27.27 | -0.07 | -0.33 |
| STPMKWGKKL | 40 | -0.25 | -1.04 | NRWFEEFKK | 33.33 | -0.47 | -2.01 |
| SWDESYTEL | 22.22 | -0.19 | -1.24 | PETFPTVSQF | 50 | -0.03 | -0.26 |
| TAALSNKVL | 55.56 | -0.01 | 0.72 | QELYKNSSAL | 30 | -0.22 | -0.79 |
| TGYQQAALKW | 40 | -0.11 | -0.68 | RVNANTAAL | 55.56 | -0.16 | 0.13 |
| TIKSWDESY | 22.22 | -0.22 | -1.21 | SADSMITNL | 44.44 | -0.03 | 0.3 |
| VSSTGIVKK | 33.33 | -0.10 | 0.27 | SEHLLHQSL | 33.33 | -0.12 | -0.4 |
| VTPETFPTV | 55.56 | 0.04 | 0.27 | SFQQNRIYM | 33.33 | -0.27 | -0.88 |
| YMHPAVLTA | 66.67 | 0.13 | 0.74 | SQFLFELGK | 44.44 | -0.03 | 0.12 |
| ADSMITNLLK | 50 | -0.06 | 0.34 | SVKEMLSDM | 44.44 | -0.15 | -0.08 |
| AEYKVPGEI | 44.44 | -0.08 | -0.41 | TFPTVSQFL | 55.56 | 0.10 | 0.7 |
| ALNGYLDKHK | 30 | -0.25 | -1.03 | TFPTVSQFLF | 60 | 0.15 | 0.91 |
| ALSNKVLAEY | 50 | -0.05 | 0.24 | TVSQFLFEL | 55.56 | 0.12 | 0.99 |
| ASEHLLHQSL | 40 | -0.08 | -0.18 | VPNLDRFVF | 66.67 | -0.04 | 0.52 |
| ATDDAQKDSIY | 27.27 | -0.29 | -1.15 | WFEKNAGTI | 44.44 | -0.05 | -0.42 |
| DEMNRWFEEF | 40 | -0.31 | -1.54 | YELFADDSF | 44.44 | -0.03 | -0.16 |
| DRASADSMI | 44.44 | -0.25 | -0.34 | YKVPGEIVM | 55.56 | 0.05 | 0.46 |
| ETFPTVSQFLF | 54.55 | 0.08 | 0.51 | YLDKHKDEV | 22.22 | -0.40 | -1.64 |

For the Peptide 2.0 analysis, the threshold was established at 40.46%, corresponding to the hydrophobicity value of the full-length protein.

**Supplementary Table 10** Toxicity analysis of selected epitopes

| **Toxinpred** | | | | **ToxIBTL** | | **CSM-Toxin** | | |
| --- | --- | --- | --- | --- | --- | --- | --- | --- |
| **No** | **Peptide Sequence** | **Prediction** | **SVM Score** | **Result** | **Score** | | **Prediction** | **Probability** |
| 1 | ALSNKVLAEYK | Non-toxin | -0.42 | toxic | 0.99999607 | | Non-toxic | 0.49 |
| 2 | ALVATGLAK | Non-toxin | -0.94 | non-toxic | 7,87E+00 | | Toxic | 0.52 |
| 3 | AQIDTAFSSY | Non-toxin | -0.67 | non-toxic | 8,52E-22 | | Toxic | 0.55 |
| 4 | AQSAQIDTAF | Non-toxin | -0.53 | non-toxic | 6,09E-31 | | Non-toxic | 0.02 |
| 5 | ASALVEATK | Non-toxin | -1.25 | non-toxic | 3,45E-13 | | Non-toxic | 0.12 |
| 6 | DMIRRRNLIL | Non-toxin | -0.45 | toxic | 0.99999833 | | Non-toxic | 0.47 |
| 7 | DTAFSSYYWLY | Non-toxin | -0.65 | non-toxic | 1,83E-09 | | Non-toxic | 0.0 |
| 8 | EIVMSVKEM | Non-toxin | -0.26 | non-toxic | 3,68E-13 | | Toxic | 0.52 |
| 9 | FVKGKYIMAF | Non-toxin | -0.68 | non-toxic | 6,37E-06 | | Toxic | 0.6 |
| 10 | GYQQAALKW | Non-toxin | -0.97 | toxic | 0.9999995 | | Non-toxic | 0.47 |
| 11 | IALVATGLAK | Non-toxin | -0.97 | non-toxic | 5,46E-04 | | Toxic | 0.77 |
| 12 | KHIAKAQEL | Non-toxin | -0.43 | non-toxic | 1,04E-26 | | Non-toxic | 0.3 |
| 13 | KQSPFQNAY | Non-toxin | -0.69 | non-toxic | 0.029409789 | | Non-toxic | 0.03 |
| 14 | KWGKKLYEL | Non-toxin | -0.90 | non-toxic | 3,79E+00 | | Non-toxic | 0.49 |
| 15 | KYIMAFNPPW | Non-toxin | -0.46 | toxic | 0.9999738 | | Toxic | 0.53 |
| 16 | LTAGRISEM | Non-toxin | -1.07 | non-toxic | 0.007647459 | | Non-toxic | 0.02 |
| 17 | MIRRRNLIL | Non-toxin | -0.50 | non-toxic | 1,41E-01 | | Toxic | 0.69 |
| 18 | NRIYMHPAV | Non-toxin | -1.18 | non-toxic | 3,78E-28 | | Non-toxic | 0.35 |
| 19 | QIDTAFSSY | Non-toxin | -0.79 | non-toxic | 3,26E-20 | | Non-toxic | 0.01 |
| 20 | QIDTAFSSYY | Non-toxin | -0.68 | non-toxic | 1,24E-04 | | Non-toxic | 0.07 |
| 21 | QSAQIDTAF | Non-toxin | -0.62 | non-toxic | 6,78E-24 | | Non-toxic | 0.13 |
| 22 | REFVKGKYI | Non-toxin | -0.38 | non-toxic | 4,24E-03 | | Non-toxic | 0.09 |
| 23 | RISEMGVCF | Non-toxin | -1.24 | toxic | 0.6393609 | | Non-toxic | 0.1 |
| 24 | RIYMHPAVL | Non-toxin | -1.29 | non-toxic | 0.0 | | Non-toxic | 0.39 |
| 25 | RRRNLILNR | Non-toxin | -0.92 | non-toxic | 1,18E-16 | | Non-toxic | 0.46 |
| 26 | SAQIDTAFSSY | Non-toxin | -0.66 | non-toxic | 6,77E-30 | | Non-toxic | 0.0 |
| 27 | SLVGKQSPF | Non-toxin | -0.68 | non-toxic | 1,73E+01 | | Non-toxic | 0.24 |
| 28 | STPMKWGKKL | Non-toxin | -0.73 | toxic | 0.9999999 | | Non-toxic | 0.03 |
| 29 | SWDESYTEL | Non-toxin | -1.16 | non-toxic | 1,40E-02 | | Non-toxic | 0.09 |
| 30 | TAALSNKVL | Non-toxin | -0.75 | non-toxic | 1,64E-04 | | Toxic | 0.67 |
| 31 | TGYQQAALKW | Non-toxin | -0.91 | toxic | 0.9877087 | | Non-toxic | 0.49 |
| 32 | TIKSWDESY | Non-toxin | -0.79 | non-toxic | 7,09E-11 | | Non-toxic | 0.28 |
| 33 | VSSTGIVKK | Non-toxin | -0.56 | non-toxic | 5,84E-14 | | Non-toxic | 0.35 |
| 34 | VTPETFPTV | Non-toxin | -1.23 | non-toxic | 5,43E-21 | | Toxic | 0.91 |
| 35 | YMHPAVLTA | Non-toxin | -0.72 | non-toxic | 1,74E-23 | | Toxic | 0.57 |
| 36 | ADSMITNLLK | Non-toxin | -1.03 | non-toxic | 2,95E-04 | | Non-toxic | 0.35 |
| 37 | AEYKVPGEI | Non-toxin | -0.44 | toxic | 0.9999784 | | Non-toxic | 0.32 |
| 38 | ALNGYLDKHK | Non-toxin | -1.08 | non-toxic | 3,16E-07 | | Toxic | 0.67 |
| 39 | ALSNKVLAEY | Non-toxin | -0.59 | toxic | 0.99998665 | | Non-toxic | 0.25 |
| 40 | ASEHLLHQSL | Non-toxin | -0.59 | non-toxic | 0.00027193959 | | Non-toxic | 0.0 |
| 41 | ATDDAQKDSIY | Non-toxin | -1.25 | non-toxic | 1,58E-23 | | Non-toxic | 0.15 |
| 42 | DEMNRWFEEF | Non-toxin | -0.61 | non-toxic | 3,02E-28 | | Toxic | 0.73 |
| 43 | DRASADSMI | Non-toxin | -0.84 | non-toxic | 1,54E-05 | | Non-toxic | 0.47 |
| 44 | DTFTNSYSF | Non-toxin | -0.87 | non-toxic | 0.006997126 | | Non-toxic | 0.04 |
| 45 | DVPKIEQLTGY | Non-toxin | -1.21 | non-toxic | 1,54E-07 | | Non-toxic | 0.32 |
| 46 | EHLLHQSLV | Non-toxin | -0.55 | non-toxic | 3,30E-01 | | Non-toxic | 0.21 |
| 47 | ELYKNSSAL | Non-toxin | -0.19 | non-toxic | 6,74E-18 | | Toxic | 0.61 |
| 48 | ESVPNLDRF | Non-toxin | -1.07 | non-toxic | 3,27E-14 | | Non-toxic | 0.02 |
| 49 | ETFPTVSQF | Non-toxin | -1.15 | non-toxic | 8,86E-32 | | Non-toxic | 0.01 |
| 50 | ETFPTVSQFL | Non-toxin | -1.10 | non-toxic | 1,62E-30 | | Non-toxic | 0.49 |
| 51 | ETFPTVSQFLF | Non-toxin | -1.11 | non-toxic | 1,60E-19 | | Non-toxic | 0.41 |
| 52 | FPTVSQFLF | Non-toxin | -0.98 | non-toxic | 0.0 | | Toxic | 0.61 |
| 53 | FRVNANTAA | Non-toxin | -0.93 | non-toxic | 0.00045994582 | | Non-toxic | 0.36 |
| 54 | FRVNANTAAL | Non-toxin | -0.93 | non-toxic | 5,37E+01 | | Non-toxic | 0.34 |
| 55 | FSSYYWLYK | Non-toxin | -0.41 | non-toxic | 5,74E-09 | | Non-toxic | 0.36 |
| 56 | GHTKSILNL | Non-toxin | -1.20 | non-toxic | 5,10E-17 | | Non-toxic | 0.43 |
| 57 | GLVDTFTNSY | Non-toxin | -0.76 | toxic | 0.9999229 | | Non-toxic | 0.42 |
| 58 | HIAKAQELY | Non-toxin | -0.53 | non-toxic | 1,63E-24 | | Non-toxic | 0.09 |
| 59 | HIAKAQELYK | Non-toxin | -0.39 | non-toxic | 3,95E-15 | | Non-toxic | 0.28 |
| 60 | HLLHQSLVGK | Non-toxin | -0.74 | non-toxic | 2,83E-07 | | Toxic | 0.65 |
| 61 | IFDEAKKTV | Non-toxin | -0.92 | non-toxic | 2,74E-18 | | Toxic | 0.63 |
| 62 | KALLSTPMK | Non-toxin | -1.11 | toxic | 0.99974245 | | Non-toxic | 0.27 |
| 63 | KTIVKLFEV | Non-toxin | -0.64 | non-toxic | 2,08E-13 | | Non-toxic | 0.06 |
| 64 | KTVEALNGY | Non-toxin | -0.78 | non-toxic | 2,92E-03 | | Toxic | 0.69 |
| 65 | KWGKKLYELF | Non-toxin | -0.93 | non-toxic | 3,38E+01 | | Non-toxic | 0.23 |
| 66 | LLHQSLVGK | Non-toxin | -0.78 | non-toxic | 2,05E-03 | | Toxic | 0.65 |
| 67 | LSNKVLAEY | Non-toxin | -0.68 | toxic | 0.9833066 | | Non-toxic | 0.05 |
| 68 | LVDTFTNSY | Non-toxin | -0.69 | toxic | 0.9999889 | | Non-toxic | 0.08 |
| 69 | LVDTFTNSYS | Non-toxin | -0.77 | toxic | 0.99998355 | | Non-toxic | 0.35 |
| 70 | LYELFADDSF | Non-toxin | -0.87 | non-toxic | 2,53E-16 | | Non-toxic | 0.33 |
| 71 | NGLVDTFTNSY | Non-toxin | -0.63 | toxic | 1.0 | | Toxic | 0.62 |
| 72 | NRWFEEFKK | Non-toxin | -0.82 | non-toxic | 3,28E-12 | | Toxic | 0.65 |
| 73 | PETFPTVSQF | Non-toxin | -1.20 | non-toxic | 7,70E-27 | | Non-toxic | 0.1 |
| 74 | QELYKNSSAL | Non-toxin | -0.09 | non-toxic | 1,86E-15 | | Non-toxic | 0.01 |
| 75 | RVNANTAAL | Non-toxin | -0.72 | non-toxic | 8,57E-08 | | Toxic | 0.53 |
| 76 | SADSMITNL | Non-toxin | -0.82 | non-toxic | 2,10E-17 | | Toxic | 0.51 |
| 77 | SEHLLHQSL | Non-toxin | -0.60 | toxic | 0.8242968 | | Non-toxic | 0.29 |
| 78 | SFQQNRIYM | Non-toxin | -1.63 | non-toxic | 0.0 | | Non-toxic | 0.15 |
| 79 | SQFLFELGK | Non-toxin | -0.92 | non-toxic | 9,47E-10 | | Non-toxic | 0.0 |
| 80 | SVKEMLSDM | Non-toxin | -0.67 | non-toxic | 4,76E-04 | | Non-toxic | 0.07 |
| 81 | TFPTVSQFL | Non-toxin | -1.07 | non-toxic | 0.0 | | Toxic | 0.54 |
| 82 | TFPTVSQFLF | Non-toxin | -1.07 | non-toxic | 0.0 | | Non-toxic | 0.39 |
| 83 | TVSQFLFEL | Non-toxin | -1.02 | non-toxic | 0.0 | | Non-toxic | 0.04 |
| 84 | VPNLDRFVF | Non-toxin | -1.04 | non-toxic | 1,95E-18 | | Non-toxic | 0.31 |
| 85 | WFEKNAGTI | Non-toxin | -0.70 | non-toxic | 3,75E-16 | | Toxic | 1.0 |
| 86 | YELFADDSF | Non-toxin | -0.98 | non-toxic | 1,17E-03 | | Toxic | 0.58 |
| 87 | YKVPGEIVM | Non-toxin | -0.59 | non-toxic | 4,42E-09 | | Non-toxic | 0.02 |
| 88 | YLDKHKDEV | Non-toxin | -1.30 | non-toxic | 6,49E-27 | | Toxic | 0.61 |

**Supplementary Table 11** Population covarage analysis of selected peptides (IEDB)

| **Epitop** | **Allel** | **coveragea** | **average_hitb** | **pc90c** |
| --- | --- | --- | --- | --- |
| ADSMITNLLK | A0301,A1101 | 30.92% | 0.32 | 0.14 |
| AEYKVPGEI | B1301,B1302,B3701,B4001,B4002,B4402,B440,B4801,B4901,B5201 | 37.39% | 0.41 | 0.16 |
| ALNGYLDKHK | A0301 | 16.81% | 0.17 | 0.12 |
| ALSNKVLAEY | A0101,A0301,B1501,B1525,A2902,A3002 | 43.89% | 0.5 | 0.18 |
| ALSNKVLAEYK | A0301 | 16.81% | 0.17 | 0.12 |
| ALVATGLAK | A0301,A1101,A3001,A7401 | 35.91% | 0.38 | 0.16 |
| AQIDTAFSSY | A0101,A2501,A2601,A2902,A3002,B1501,B1502,B1525,B1801,B4403,B4601 | 49.89% | 0.62 | 0.2 |
| AQSAQIDTAF | B1301,B1501,B1502,B1525,B4801 | 16.1% | 0.17 | 0.12 |
| ASALVEATK | A0301,A1101,A3001,A6801,A7401 | 40.56% | 0.44 | 0.17 |
| ASEHLLHQSL | B4001,B4002,B4402 | 18.29% | 0.19 | 0.12 |
| ATDDAQKDSIY | A0101 | 17.34% | 0.17 | 0.12 |
| DEMNRWFEEF | B1801,B4402,B4403 | 20.42% | 0.21 | 0.13 |
| DMIRRRNLIL | B0801 | 10.55% | 0.11 | 0.11 |
| DRASADSMI | B1402,B3801,B3901 | 8.72% | 0.09 | 0.11 |
| DTAFSSYYWLY | A0101,A2601 | 22.62% | 0.23 | 0.13 |
| DTFTNSYSF | A0101, A2501, A2601, A2902, B5101, B5301, B5802 | 23.55% | 0.26 | 0.13 |
| DVPKIEQLTGY | A2501,A2601 | 9.07% | 0.09 | 0.11 |
| EHLLHQSLV | B1402,B1509,B3801 | 6.16% | 0.06 | 0.11 |
| EIVMSVKEM | A2501,A2601 | 9.07% | 0.09 | 0.11 |
| ELYKNSSAL | A2501,B0801,B0803,B1402,B1502,B1509,B2720,B3901,C0303,C1402 | 29.75% | 0.33 | 0.14 |
| ESVPNLDRF | A2501,A2601,B3501,B5301,B5801,B5802 | 23.96% | 0.26 | 0.13 |
| ETFPTVSQF | A2501,A2601,B1503,B1517,C1203 | 19.99% | 0.21 | 0.12 |
| ETFPTVSQFL | A2501,A2601 | 9.07% | 0.09 | 0.11 |
| ETFPTVSQFLF | A2402,A2601,B3503 | 28.99% | 0.31 | 0.14 |
| FPTVSQFLF | B0802,B3501,B3503 | 11.75% | 0.12 | 0.11 |
| FRVNANTAA | B3901 | 2.75% | 0.03 | 0.1 |
| FRVNANTAAL | B2705,B3901 | 7.46% | 0.08 | 0.11 |
| FSSYYWLYK | A0101,A0301,A1101 | 45.19% | 0.5 | 0.18 |
| FVKGKYIMAF | A2501,A2601,B0801,B1501 | 25.92% | 0.28 | 0.13 |
| GHTKSILNL | B1402,B3801,B3901,B4801 | 10.35% | 0.11 | 0.11 |
| GLVDTFTNSY | A0101,A2601,A2902,A3002,B1501,B1502,B1525 | 36.95% | 0.42 | 0.16 |
| GYQQAALKW | A2301,A2402,A2403 | 26.6% | 0.27 | 0.14 |
| HIAKAQELY | A2601 | 5.82% | 0.06 | 0.11 |
| HIAKAQELYK | A0301,A1101 | 30.92% | 0.32 | 0.14 |
| HLLHQSLVGK | A0301 | 16.81% | 0.17 | 0.12 |
| IALVATGLAK | A0301 | 16.81% | 0.17 | 0.12 |
| IFDEAKKTV | C0401,C0501,C0704,C0802,C1402,G0101,G0102,G0103,G0104 | 99.58% | 1,79 | 1,26 |
| KALLSTPMK | A0301,A1101,A3001 | 34.14% | 0.36 | 0.15 |
| KHIAKAQEL | B1402,B3801,B3901,BB4801,C0602,C0701,C0702,C0704 | 57.78% | 0.7 | 0.24 |
| KQSPFQNAY | A2902,A3002,A3201,B1301,B1501,B1502,B1503,B1525,B1801,B4601,B4801,B5801,B5802,C0202,C0209,C0302,C0702,C1202,C1203,C1402 | 67.89% | 0.98 | 0.31 |
| KTIVKLFEV | A0201,A0206,A0212,A3001,A3201,B1517,C1502,C1701 | 51.5% | 0.58 | 0.21 |
| KTVEALNGY | A0101,A2501,A2601,A2902,A3002,A3201,A7401,A1101,B1501,B1517,B1525,B4601,B5701,B5801,B5802 | 60.22% | 0.79 | 0.25 |
| KWGKKLYEL | A2301,A2402,A2403,G0101,G0102,G0103,G0104,G0106 | 99.86% | 1,75 | 1,26 |
| KWGKKLYELF | A2301,A2402 | 26.18% | 0.27 | 0.14 |
| KYIMAFNPPW | A2301,A2402,A2403 | 26.6% | 0.27 | 0.14 |
| LLHQSLVGK | A0301,A1101,A7401 | 32.73% | 0.35 | 0.15 |
| LSNKVLAEY | A0101,A0301,B1501,B1517,B3501 | 44.01% | 0.52 | 0.18 |
| LTAGRISEM | A2501,A2601,B1402,B1517,C1502 | 16.06% | 0.17 | 0.12 |
| LVDTFTNSY | A0101,B3501,C0501,C0802,C1203 | 40.63% | 0.48 | 0.17 |
| LVDTFTNSYS | A0101,B3501,C0501,C0802,C1203 | 40.63% | 0.48 | 0.17 |
| LYELFADDSF | A2301,A2402 | 26.18% | 0.27 | 0.14 |
| MIRRRNLIL | A3001,B0702,B0801,B0802,B0803,B1402,E0101 | 81.91% | 1,05 | 0.55 |
| NGLVDTFTNSY | A0101 | 17.34% | 0.17 | 0.12 |
| NRIYMHPAV | B1402,B1509,B2720,B3801,B3901,C0701,0702 | 44.0% | 0.5 | 0.18 |
| NRWFEEFKK | B2705 | 4.78% | 0.05 | 0.11 |
| PETFPTVSQF | A2501,A2601 | 9.07% | 0.09 | 0.11 |
| QELYKNSSAL | B4001,B4002 | 11.13% | 0.11 | 0.11 |
| QIDTAFSSY | A0101,A2501,A2601,A2902,A3002,B1501,B1502,B1525,B3501 | 44.88% | 0.54 | 0.18 |
| QIDTAFSSYY | A0101,A2601,A2902,A3002 | 28.12% | 0.29 | 0.14 |
| QSAQIDTAF | A2501,B1502,B1517,B3501 | 14.26% | 0.15 | 0.12 |
| REFVKGKYI | B2720,B4002,B4013 | 3.45% | 0.03 | 0.1 |
| RISEMGVCF | A3201,B1501,B1502,B1517,B1525,B4601,C0202,C0209,C0302,C0501,C1202,C1601 | 42.77% | 0.51 | 0.17 |
| RIYMHPAVL | B0801,B1503,B1509,B2720,B4013,B4601,C0303,C0401,C0702,C1203,C1402,C1502,C1601,C1701,E0101 | 92.06% | 1,65 | 1,06 |
| RRRNLILNR | B2705 | 4.78% | 0.05 | 0.11 |
| RVNANTAAL | A3001, A3201, B0702, B1402, B1517, B1525, B1501, B0801, B5501, B4801, B4601, C0303, C1402, C1502, C1202, C0702, C0704, C1601, C1701, C0102, C0202, C0209, C0302, C0303, C0304,C0501,C0801, C0802, C1203, E0101,G0101, G0102, G0103, G0104, G0106 | 99.99% | 3,38 | 2,5 |
| SADSMITNL | B3503, E0101, G0101, G0102, G0103, G0104, G0106, C0102, C0202, C0209, C0302, C0303, C0304, C0401, C0501, C0704, C0801, C0802, C1202, C1203, C1502, C1601, C1701 | 99.99% | 3,38 | 2,5 |
| SAQIDTAFSSY | A0101, B1501 | 24.32% | 0.26 | 0.13 |
| SEHLLHQSL | B1301, B1302, B1402, B1801, B3901, B4001,B4002,B3701,B3801,B4402,B4403,B4801,B4901,B5001 | 48.77% | 0.56 | 0.2 |
| SFQQNRIYM | G0101, G0102, G0103, G0104, G0106, C0602,C1402,C0401,C0701,C0702,C0704 | 99.94% | 2,31 | 1,06 |
| SLVGKQSPF | B1501,B1502,B1525,B4601,A3201 | 19.07% | 0.2 | 0.12 |
| SQFLFELGK | A0301, A1101, A7401 | 32.73% | 0.35 | 0.15 |
| STPMKWGKKL | B0702 | 12.78% | 0.13 | 0.11 |
| SVKEMLSDM | A2501, A2601, B4601 | 11.86% | 0.12 | 0.11 |
| SWDESYTEL | A2301,A2402,E0101,G0101,G0102,G0103,G0104,G0106,C0102,C0401,C0501,C1402,C0702,C0704,C0801,C0802,C1701 | 99.99% | 3,28 | 2,34 |
| TAALSNKVL | B3503,C0303,C0304,C1601 | 27.1% | 0.29 | 0.14 |
| TFPTVSQFL | A2301,A2402,A2403,E0101,C0401,C1402,G0101,G0102,G0103,G0104,G0106 | 99.97% | 2,73 | 2,07 |
| TFPTVSQFLF | A2301,A2402,B3503,G0101,G0102,G0103,G0104,G0106 | 99.86% | 1,78 | 1,27 |
| TGYQQAALKW | A2301, A2402,B5701,B5801,B5802 | 33.31% | 0.37 | 0.15 |
| TIKSWDESY | A2501,A2601,A2902,A3002,B1501,B1502,B1525,B3501,B4601 | 34.49% | 0.39 | 0.15 |
| TVSQFLFEL | A0202,A0206,A0217,A6802,C0801,C1601,C1701 | 16.86% | 0.18 | 0.12 |
| VPNLDRFVF | B0702,B1502,B3501,B3503,B5301,B5501,B5601 | 31.1% | 0.33 | 0.15 |
| VSSTGIVKK | A0301,A1101,A3001,A7401 | 35.91% | 0.38 | 0.16 |
| VTPETFPTV | A0205,A0206,A0207,0211,C1402 | 7.39% | 0.08 | 0.11 |
| WFEKNAGTI | A0205,C0401,C0704 | 23.86% | 0.24 | 0.13 |
| YELFADDSF | B1301,B1302,B1502,B1801,B3701,B3801,B4002,B4901,B4402,B4403 | 37.81% | 0.42 | 0.16 |
| YKVPGEIVM | B1402,B1503,B1509,B3501,B3503,B3801,B3901,B4801,C0302,C0303,C0304,C0602,C0701,C0702,C0801,C1202,C1203 | 81.71% | 1,23 | 0.55 |
| YLDKHKDEV | A0201,A0205,A0206,A0207,A0211,A0212,A0216,A0219,A0250,C0102,C0401,C0501,C0704,C0801,C0802,C1502,C1701,E0101 | 92.96% | 1,77 | 1,09 |
| YMHPAVLTA | A0201,A0203,A0211,A0212,A0216,B0802,B0803,C1203,C1402 | 48.19% | 0.54 | 0.19 |


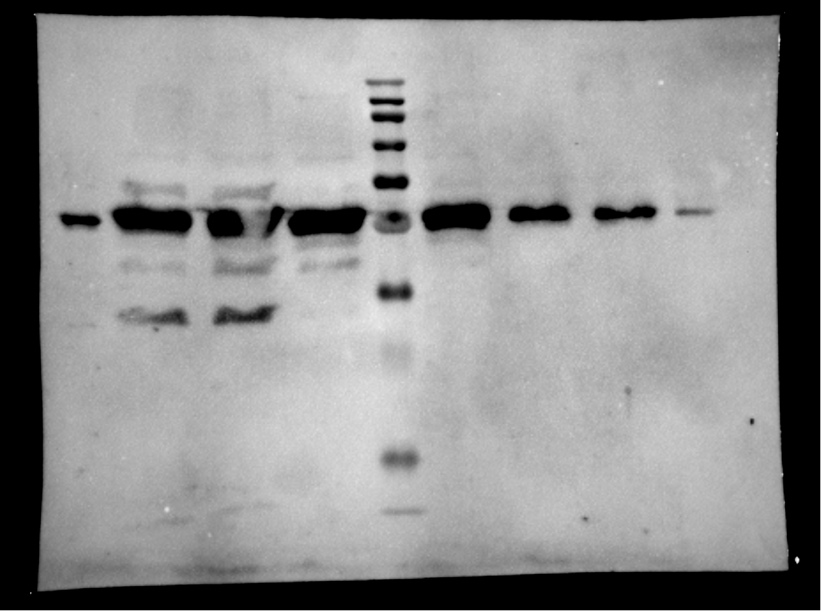


**Supplementary Figure 1** Western blotting of recombinant CCHFV-NP to evaluate IgG responses by ELISA, 54 kDa (it sequentially presents the elution steps from left to right)
